1 Evolutionary outcomes of plasmid-CRISPR conflicts in an opportunistic pathogen

2

3

4 Wenwen Huo<sup>ab</sup>, Valerie J. Price<sup>ab</sup>, Ardalan Sharifi<sup>a</sup>, Michael Q. Zhang<sup>a</sup>, and Kelli L.

5 Palmer<sup>a\*</sup>

6

7 Department of Biological Sciences, The University of Texas at Dallas, Richardson,

8 Texas, USA<sup>a</sup>

9 <sup>b</sup>These authors contributed equally

10 \*Corresponding author

11 E-mail: [kelli.palmer@utdallas.edu](mailto:kelli.palmer@utdallas.edu) (KLP)

12 **Abstract**

13 The persistence of antibiotic resistance plasmids in pathogens is a global health  
14 concern. Plasmid persistence results from host-plasmid co-evolution that enhances  
15 plasmid stability, where the role of CRISPR-Cas is not well understood. *Enterococcus*  
16 *faecalis* is an opportunistic pathogen that disseminates antibiotic resistance via  
17 conjugative plasmids. Some *E. faecalis* possess CRISPR-Cas that limit acquisition of  
18 resistance plasmids; however, transconjugants arise despite CRISPR-Cas activity. We  
19 utilized *in vitro* evolution to investigate how the conflict between CRISPR-Cas and  
20 plasmid targets is resolved. We observed a cost to maintain both the plasmid and  
21 functional CRISPR-Cas. Under antibiotic selection, heterogeneous populations with  
22 compromised CRISPR-Cas emerged, which benefited acquisition of other plasmids.  
23 Using targeted sequencing, we demonstrate RecA-independent allelic heterogeneity  
24 provides an evolutionary basis for the emergence of compromised CRISPR-Cas.  
25 Overall, antibiotic selection for plasmids targeted by CRISPR-Cas results in host  
26 mutations that stabilize plasmid maintenance and reduce the barrier to future horizontal  
27 gene transfer events.

28

## 29 Introduction

30

31 Plasmid-mediated dissemination of antibiotic resistance contributes to the rapid  
32 emergence of multidrug-resistant (MDR) bacterial pathogens. The emergence and  
33 persistence of antibiotic resistance is one of the most challenging problems facing health  
34 care today. The opportunistic pathogen *Enterococcus faecalis* is a paradigm for the  
35 emergence of antibiotic resistance by horizontal gene transfer (HGT) (1-5). Conjugative  
36 and mobilizable plasmids belonging to both narrow and broad host range classes  
37 disseminate antibiotic resistance genes in *E. faecalis* (6-10). Hospital-adapted strains of  
38 *E. faecalis* have an enhanced propensity to engage in HGT, making them reservoirs for  
39 antibiotic resistance genes that can be transferred to other gram-positive pathogens  
40 including *Enterococcus faecium*, staphylococci, streptococci and *Clostridium difficile* (3,  
41 11-14).

42

43 Much research on antibiotic resistance focuses on the mechanisms that facilitate  
44 persistence of antibiotic resistance plasmids in bacterial populations when antibiotic  
45 selection is absent (15-18). Persistent plasmids are reservoirs for accessory genes that  
46 can be readily shared and utilized for rapid adaptation to new environments (15, 17, 19).  
47 Overall, this speeds up the evolution of bacteria by negating the reliance on adaptation  
48 by mutation (20, 21). There is growing consensus in the field that the persistence of  
49 resistance plasmids in the absence of antibiotic selection is due to compensatory  
50 mutations made in the host, plasmid, or both (17, 21, 22). These mutations reduce the  
51 metabolic burden of plasmid carriage, and also reduce the rate at which the plasmid can  
52 engage in horizontal transfer while stabilizing the vertical inheritance of the plasmid,  
53 ultimately leading to plasmid persistence (23).

54

55 A facet of host-plasmid co-evolution that is currently poorly understood is the impact of  
56 host-encoded CRISPR-Cas systems, which can block the acquisition of potentially  
57 beneficial mobile genetic elements (MGEs) and thus significantly impact host fitness in  
58 different environments. CRISPR-Cas systems confer programmable genome defense  
59 against plasmids and phage. CRISPR-Cas systems consist of *cas* genes and a CRISPR  
60 array composed of spacers interspersed by direct and partially palindromic repeats (24,  
61 25). Each spacer is a molecular memory of a previously encountered MGE (26-28). *E.*  
62 *faecalis* possesses Type II CRISPR-Cas systems that encode the endonuclease Cas9  
63 (4, 29). CRISPR-Cas defense is afforded in three stages, adaptation, expression and  
64 interference, that ultimately result in sequence-specific cleavage of MGEs by a *cas*-  
65 encoded endonuclease. A Cas protein complex recognizes a protospacer from a newly  
66 encountered MGE in a PAM (Protospacer Adjacent Motif)-dependent manner, after  
67 which the protospacer is incorporated into the leader end of the CRISPR array (30, 31).  
68 During expression, the CRISPR array is transcribed and processed by Cas9, RNase III,  
69 and *tracrRNA* (trans-activating crRNA) generating a mature crRNA (32, 33). Each  
70 mature crRNA is bound by Cas9 and *tracrRNA* to form an active targeting complex.  
71 When the bacterial host is invaded by a MGE that has complementarity to a crRNA, the  
72 active targeting complex recognizes the target in a PAM-dependent manner and creates  
73 a double-stranded DNA break, which prevents MGE invasion (34-36).

74

75 We reported in previous studies that Type II CRISPR-Cas systems reduce plasmid  
76 dissemination in *E. faecalis* colony biofilms by 80-fold (37). Although CRISPR-Cas had a  
77 significant impact on plasmid transfer, we still observed a high number ( $10^5$ )  
78 transconjugants (37). This observation suggests that unique interactions occur under  
79 these mating conditions that allow plasmids to escape genome defense. Moreover, in  
80 these transconjugants a conflict is established between a CRISPR-Cas system and one

81 of its targets. These transconjugants present a unique opportunity to study the role of  
82 CRISPR-Cas systems in plasmid-host interactions. In this study, we used a combination  
83 of *in vitro* evolution and deep sequencing analysis to investigate how *E. faecalis* resolves  
84 conflicts between CRISPR-Cas and antibiotic resistance plasmids, and the role that  
85 antibiotic selection plays in this process. We conclude that antibiotic-driven PRP  
86 maintenance in *E. faecalis* can lead to compromised genome defense and enhanced  
87 susceptibility to other MGEs, ultimately transforming these strains into reservoirs for  
88 antibiotic resistance and other virulence traits. These findings demonstrate that  
89 antibiotics can alter pathogen evolution by accelerating the host-adaptation process that  
90 results in antibiotic resistance plasmid persistence.

91

## 92 **Results**

93

94 **Design of *in vitro* evolution assay to study CRISPR-Cas and plasmid dynamics.** *E.*  
95 *faecalis* T11RF possesses a Type II CRISPR-Cas system, CRISPR3-Cas, that has 21  
96 unique spacers (Fig 1) (37). Spacer 6 has 100% sequence identity to the *repB* gene of  
97 the PRP pAD1 (38, 39). Previous research from our lab demonstrated that T11RF  
98 CRISPR3-Cas significantly reduces the conjugation frequency of pAM714, a derivative  
99 of pAD1 conferring erythromycin resistance via *ermB* (37). CRISPR3-Cas genome  
100 defense against pAM714 required both *cas9* and spacer 6 sequences. However, despite  
101 the activity of CRISPR3-Cas, a large number ( $\sim 10^5$ ) of T11RF pAM714 transconjugants  
102 were obtained from these conjugation reactions. We hypothesized that the T11RF  
103 pAM714 transconjugants were subject to intracellular conflict between the endogenous  
104 CRISPR3-Cas and its pAM714 target, and that antibiotic selection for pAM714 could  
105 impact the outcome of this conflict.

106

107 To understand how T11RF transconjugants resolve conflicts between active CRISPR3-  
108 Cas defense and a CRISPR-Cas target, we utilized an *in vitro* evolution assay. We  
109 randomly selected transconjugant colonies from two mating schemes, T11RF pAM714  
110 and T11RF  $\Delta cas9$  pAM714; the  $\Delta cas9$  strain was included as a control for the condition  
111 where CRISPR-Cas is inactive. Next, the colonies were split equally into two growth  
112 media, BHI medium and BHI medium with erythromycin to maintain selection for  
113 pAM714; see Fig 2a (a detailed explanation of the assay conditions can be found in  
114 Materials and Methods). These populations were then passaged daily for 14 days. We  
115 performed *in vitro* evolution on a total of six T11RF pAM714 (referred to as WT1-WT6)  
116 and six T11RF  $\Delta cas9$  pAM714 (referred to as  $\Delta 1$ -  $\Delta 6$ ) transconjugants originating from  
117 two independent conjugation experiments each. Every 24 h during the course of the  
118 passage, the proportion of cells within the population that maintained pAM714 was  
119 enumerated by determining the percentage of erythromycin-resistant cells relative to the  
120 total viable population.

121

122 We established the frequency of pAM714 carriage in our transconjugant colonies at Day  
123 0, prior to serial passage (Fig 2b). As expected, pAM714 was detected at ~100%  
124 frequency for the T11RF  $\Delta cas9$  pAM714 transconjugant colonies. The frequency of  
125 plasmid carriage in the T11RF pAM714 transconjugant colonies varied greatly and was  
126 <25% for five of the six transconjugant colonies evaluated. We attribute the variability of  
127 plasmid carriage in the T11RF pAM714 transconjugants to the biofilm-like mode of  
128 colony growth, where different cells may be exposed to different antibiotic concentrations  
129 as a result of spatial heterogeneity.

130

131 In addition to determining the frequency of plasmid carriage over the course of the *in*  
132 *vitro* evolution experiments, we also selected a genetic locus to assay for variation. We

133 chose the CRISPR3 array, which is required to produce an active Cas9-crRNA targeting  
134 complex and houses a molecular memory of previous interactions with MGEs. To  
135 assess our transconjugants for pre-existing deletions in the CRISPR3 array, we  
136 performed PCR on the individual colonies, prior to initiating the passage experiments.  
137 We observed no fixed, pre-existing CRISPR3 array deletions that would allow stable  
138 maintenance of pAM714 prior to the evolution assay (Fig 2c), an observation confirmed  
139 by Sanger sequencing of CRISPR3 amplicons.

140

141 **CRISPR3-Cas eliminates its target during passage in non-selective medium.** For  
142 passage without erythromycin selection, a gradual decrease in frequency of pAM714-  
143 containing cells was observed for five out of the six WT transconjugants (Fig 3a); a  
144 discussion of WT4 will be provided later. These data are consistent with CRISPR3-Cas  
145 eliminating its target, pAM714, via Cas9 programmed with a crRNA derived from the  
146 spacer 6 ( $S_6$ ) sequence. In contrast, pAM714 was stably maintained at high frequencies  
147 in all of the T11RF $\Delta$ cas9 pAM714 transconjugant populations (Fig 3a). CRISPR3 array  
148 integrity was maintained over the course of serial passage for both T11RF pAM714 and  
149 T11RF $\Delta$ cas9 pAM714 transconjugant populations (Fig 3c). Overall, these data  
150 demonstrate that cas9-dependent pAM714 loss occurs in *E. faecalis* when passaged in  
151 the absence of antibiotic selection for pAM714. By extension, for 5 of 6 WT  
152 transconjugants, the progenitor recipient cells for these lineages must have had  
153 functional CRISPR-Cas defense.

154

155 As stated above, the WT4 population did not exhibit plasmid loss in the absence of  
156 antibiotic selection. We reasoned that this transconjugant may have been CRISPR-Cas-  
157 deficient prior to serial passage. We sequenced the cas9 coding region from passage  
158 day 1 of the WT4 population and identified a mutation resulting in an Ala749Thr

159 substitution. Ala749 occurs within the RuvC nuclease domain in T11RF Cas9 and is  
160 conserved in the model *Streptococcus pyogenes* Cas9 (37). Due to the critical catalytic  
161 function of the RuvC domain, we hypothesize that the Ala749Thr substitution confers a  
162 loss of Cas9 function. We describe the inability of the WT4 population to interfere with  
163 plasmid targets in a later section.

164

165 **Under continuous antibiotic selection, conflicts can be resolved by CRISPR**  
166 **memory loss.** Although pAM714 initially escapes CRISPR-Cas defense in some cells,  
167 when antibiotic selection for the plasmid is absent, CRISPR-Cas depletes pAM714 from  
168 transconjugant populations over time (Fig 3a). When passaging the same original  
169 transconjugant populations with erythromycin selection, we observed stable  
170 maintenance of pAM714 in both WT and  $\Delta cas9$  transconjugants (Fig 3b). Knowing that  
171 the 5 of the 6 WT passage experiments each initiated with at least some cells in the  
172 population having active CRISPR-Cas defense, we investigated how the conflict  
173 between CRISPR-Cas and pAM714 was resolved in these populations under antibiotic  
174 selection.

175

176 We amplified the CRISPR3 region of erythromycin-passaged transconjugants and  
177 observed significant heterogeneity in the CRISPR3 array for only the WT transconjugant  
178 populations (Fig 3c). By Day 14, four of the six T11RF pAM714 transconjugants had  
179 visibly reduced CRISPR3 arrays (Fig 2c); the variation in array size initiated sporadically  
180 over the 14 days and was unique in pattern of emergence for each transconjugant (SFig  
181 1). We utilized Sanger sequencing as a first-line assessment of CRISPR3 allele  
182 composition present in Day 1 and Day 14 erythromycin-passaged populations. The  
183 results showed that, for transconjugant populations where CRISPR array reduction was  
184 observed,  $S_6$  was either deleted from the array or had low sequencing quality (Table 2).



185 Low Sanger sequencing quality likely resulted from mixed populations with different  
186 deletion events arising stochastically, resulting in  $S_6$  deletion. In contrast to the WT  
187 populations, CRISPR3 arrays for the T11RF  $\Delta cas9$  pAM714 transconjugants were  
188 unchanged (Fig 3c and Table 2). We chose the  $\Delta 4$  population as a representative of the  
189 T11RF $\Delta cas9$  pAM714 transconjugant populations for future analyses as all data  
190 indicated that the six populations were equivalent. In summary,  $S_6$  was poorly tolerated  
191 in four WT transconjugants whereas no diversification of the CRISPR3 array occurred in  
192  $\Delta cas9$  transconjugants. This suggests that under antibiotic selection, the conflict  
193 between CRISPR3-Cas and its target can be resolved by compromising the CRISPR3-  
194 Cas system, in the form of either  $S_6$  loss (populations WT2, WT3, WT5, WT6) or *cas9*  
195 mutation (population WT4).

196

197 The WT1 population is discussed further here. PCR analysis of transconjugant WT1  
198 indicated that the wild-type CRISPR3 allele was present after 14 days of passage with  
199 erythromycin (Fig 3c). However, Sanger sequencing detected a mixed population in the  
200 region of  $S_6$  and  $S_7$  after passage day 1, which was not detected after passage day 14  
201 (Table 2). Therefore, a  $S_6$  deletion arose during the passage experiment but did not  
202 become fixed. Mutations in other CRISPR-associated factors could have arisen in the  
203 WT1 population.

204

205 To investigate this possibility, we performed whole genome Illumina deep sequencing on  
206 five Day 14 erythromycin-passaged T11RF pAM714 transconjugant populations and a  
207 control population,  $\Delta 4$  (see Table 2). We observed variation in *cas9* sequence in the  
208 WT1, WT2, and WT3 populations (Table 3). All of the mutations led to nonsynonymous  
209 changes and are predicted to result in Cas9 loss of function (Table 3). In addition to *cas9*  
210 mutations, we observed variation in six other genes in some of the populations

211 (STable2). No variations were identified in the S<sub>6</sub> protospacer or PAM region of pAM714,  
212 although one variation was identified elsewhere in *repB* in the WT2 population  
213 (STable2).

214

215 **Reduced tolerance of S<sub>6</sub> in T11RF pAM714 transconjugant populations.** To attain  
216 greater resolution of CRISPR3 alleles beyond what Sanger sequencing could achieve,  
217 we deep-sequenced CRISPR3 amplicons from populations of interest, beginning with  
218 BHI-passaged T11RF (lacking pAM714) (Fig. 4a) and a representative  $\Delta cas9$  pAM714  
219 transconjugant passaged in erythromycin (Fig. 4b) as controls. We first mapped  
220 CRISPR3 amplicon reads to the T11 reference sequence and calculated coverage depth  
221 to analyze mapping efficiency. Serial passaging for 14 days slightly altered the  
222 distribution of reads across the amplicon but did not result in a strong preference for the  
223 abundance or absence of any spacer.

224

225 We then expanded this analysis to the T11RF pAM714 transconjugants, excepting WT4.  
226 As expected, depletion of S<sub>6</sub> was detected for WT2, WT3, WT5, and WT6 populations  
227 after 14 days of passage with antibiotic selection (Fig 4d-g). For WT3, WT5, and WT6  
228 populations, S<sub>6</sub> depletion was evident after one day of passage with selection (Fig 4e-g).  
229 For WT1, depletion of S<sub>6</sub> was not detected after 14 days passage with selection (Fig 4c),  
230 consistent with our Sanger sequencing results (Table 2).

231

232 To identify specific mutant CRISPR alleles in the amplicon deep sequencing, we  
233 manually constructed artificial CRISPR reference sequences for every possible spacer  
234 deletion event (see Materials and Methods for more information). In total, 484 references  
235 were constructed, where wild type CRISPR alleles were represented by the wild type  
236 references: 5'-S<sub>x</sub>RS<sub>(x+1)</sub>-3' (0 ≤ x < 21) and 5'-S<sub>21</sub>TRS<sub>T</sub>-3'. Mutant alleles were

237 represented by 5'-S<sub>x</sub>RS<sub>y</sub>-3' ( $y \neq x+1$ ). For control T11RF passaged for 1 or 14 days in  
238 plain BHI medium, all but 28 (day 1) and 4 (day 14) alleles out of 484 possible alleles  
239 were detected. We conclude that CRISPR3 heterogeneity naturally occurs in T11RF  
240 populations, possibly as a result of slippage during DNA replication and/or recombination  
241 between CRISPR repeat sequences. This is consistent with previous research that  
242 proposed that heterogeneity exists within CRISPR arrays in bacterial populations (40-  
243 42).

244

245 The electrophoresis analysis shown in Fig 3 revealed that some T11RF pAM714  
246 transconjugant populations passaged in erythromycin possessed multiple CRISPR3  
247 alleles. We resolved the most abundant mutant CRISPR3 alleles in transconjugant  
248 populations (Fig 5) by mapping amplicon reads to wild-type and mutant CRISPR3  
249 references. The amplicon sequencing provided greater resolution than Sanger  
250 sequencing (Table 2). All T11RF transconjugant populations, other than WT1,  
251 possessed multiple co-existing CRISPR3 alleles after 14 days of passage with antibiotic  
252 selection, and each of those alleles lacked S<sub>6</sub>. Overall, we conclude that natural  
253 heterogeneity in CRISPR3 arises at a low frequency in T11RF populations, and this  
254 heterogeneity provides a genetic basis for CRISPR (host)-plasmid conflict resolution in  
255 erythromycin-passaged WT transconjugant populations.

256

257 **Preference for forward spacer deletion events.** We categorized mutant CRISPR3  
258 alleles into two groups of events: forward spacer deletion and backward spacer  
259 rearrangement. The forward mutant group represents the mutant alleles with spacer  
260 deletion (5'-S<sub>x</sub>RS<sub>y</sub>-3' where  $y > x+1$  and 5'-S<sub>x</sub>TRS<sub>T</sub>-3' where  $x < 21$ ), while the backward  
261 mutant group represents the mutant alleles with a terminal spacer becoming more  
262 leader-proximal (5'-S<sub>x</sub>RS<sub>y</sub>-3' where  $y < x$ ). We calculated forward spacer deletion and

263 backward spacer rearrangement rates for each 5' spacer as described in Materials and  
264 Methods.

265

266 We observed slightly higher forward spacer deletion rates than backward spacer  
267 rearrangement rates for leader end spacers in Day 1 and Day 14 BHI-passaged T11RF,  
268 suggesting that spacers at the leader end are more readily deleted than flipped (Fig 6a).

269 The forward deletion and backward rearrangement rates are similar at spacers S<sub>9</sub>-S<sub>15</sub> for  
270 Day 1 and Day 14 T11RF populations, indicating an equal chance of spacer deletion and  
271 flip (Fig 6a). As the 5' spacer reaches the terminal end of the array, the forward deletion  
272 and backward rearrangement rates decrease, indicating a dormant activity of spacer  
273 rearrangement near the terminal end. On average, Day 14 T11RF showed slightly lower  
274 rates for forward deletion and backward rearrangement than Day 1 T11RF.

275

276 The population diversity of the CRISPR3 array was evaluated in the same manner by  
277 analyzing the forward deletion and backward rearrangement rates in five T11RF  
278 pAM714 transconjugants and the  $\Delta$ 4 populations from Day 1 and Day 14 erythromycin  
279 passages. The distribution of forward deletion and backward rearrangement rates in the  
280  $\Delta$ 4 and WT1 populations (Fig 6b and c) were similar to T11RF (Fig 6a), except that we  
281 observed an elevated forward deletion rate at S<sub>5</sub> for WT1 at Day 1, consistent with deep  
282 sequencing results which detected S<sub>6</sub> deletion alleles occurring in this population. The  
283 forward spacer deletion events in the other T11RF pAM714 erythromycin-passaged  
284 transconjugants have unique positional preferences based on an increase in the  
285 average number of reads mapped to the mutant allele references containing spacer  
286 deletions (Fig 6 c-g; red or black dots). The elevated forward deletion rates were often  
287 observed for spacers upstream of S<sub>6</sub>, indicating a positional preference for forward  
288 deletion events upstream of S<sub>6</sub>. We speculate that this is because internal spacer

289 deletions upstream of  $S_6$  provide a selective advantage under these conditions. Finally,  
290 we did not observe significant fluctuation of backward rearrangements in erythromycin-  
291 passaged transconjugants (Fig 6 c-g), indicating that spacers are more readily deleted  
292 than flipped.

293

#### 294 **Compromised CRISPR3-Cas resulting from pAM714 conflict benefits other MGEs.**

295 Under antibiotic selection for pAM714, the CRISPR3-Cas system was compromised by  $S_6$   
296 deletion or *cas9* mutation. Considering that each spacer bears a unique memory of a  
297 previously encountered MGE, the loss of spacers surrounding  $S_6$  could lead to  
298 compromised defense against multiple MGEs. To investigate this, we engineered pCF10, a  
299 PRP conferring tetracycline resistance (43), to encode different T11RF CRISPR3  
300 protospacer targets along with the consensus CRISPR3 PAM sequence (37) (Table 1). We  
301 generated three pCF10 derivatives that would be targets for CRISPR3  $S_1$ ,  $S_6$ , or  $S_7$ ,  
302 generating plasmids pWH107.S1, pWH107.S6, and pWH107.S7, respectively. Mutant  
303 CRISPR3 alleles with  $S_6$  and  $S_7$  deletions arose in all transconjugant populations that  
304 experienced array degeneracy after antibiotic passage (Table 2) and would therefore allow  
305 us to make conclusions about compromised defense.  $S_1$  was maintained in Day 14  
306 transconjugant populations (Table 2) and serves as a test for intact CRISPR-Cas function in  
307 passaged populations. We used wild type pCF10 as a control for baseline conjugation  
308 frequency as pCF10 is not targeted by T11RF CRISPR3-Cas (37).

309

310 We performed conjugation using Day 14 BHI-passaged T11RF as a recipient and *E. faecalis*  
311 OG1SSp bearing pCF10 and its derivatives as donors to ascertain the impact of CRISPR3-  
312 Cas on conjugation frequency of the plasmid constructs. All protospacers were targeted,  
313 resulting in significant reductions in conjugation frequencies relative to wild-type pCF10 (Fig  
314 7). However, the degree of interference with plasmid transfer was different for each target;

315 CRISPR-Cas defense against a MGE bearing a target for  $S_7$  was weak compared to  $S_1$  and  
316  $S_6$ .

317

318 To determine the impact of serial passage on CRISPR-Cas defense in our transconjugant  
319 populations, we assessed conjugation of pCF10 and its derivatives to Day 14 BHI- and  
320 erythromycin-passaged populations of WT5. The erythromycin-passaged WT5  
321 transconjugant population experienced the greatest diversification within the CRISPR3 array  
322 (Table 2), and we expected it to be compromised in terms of its ability to defend against  
323 other CRISPR targets. Day 14 BHI-passaged WT5 had conjugation frequencies very similar  
324 to BHI-passaged T11RF for all pCF10 plasmids (Fig 7). This was expected because the  
325 BHI-passaged WT5 population became depleted for pAM714 over time (Fig 3a), and did not  
326 have any changes in the CRISPR3 array (Table 2), therefore it was expected to maintain  
327 CRISPR-Cas activity against all CRISPR3 targets. In contrast, Day 14 erythromycin-  
328 passaged WT5 exhibited defense only against pCF10 bearing a target for  $S_1$  (Fig 7). This is  
329 consistent with the amplicon analysis that identified multiple CRISPR3 alleles with deletions  
330 of  $S_6$  and  $S_7$  in the erythromycin-passaged WT5 population (Table 2).

331

332 We also tested the WT4 transconjugant populations for CRISPR-Cas activity. We detected a  
333 mutation within the RuvC catalytic domain coding region of *cas9* in WT4 after passage day  
334 1, and WT4 failed to deplete pAM714 when passaged without erythromycin selection (Fig  
335 3a). We expected both the BHI- and erythromycin-passaged populations of WT4 to be  
336 completely deficient for CRISPR-Cas activity if the observed mutation conferred loss of  
337 Cas9 function. CRISPR-Cas activity against  $S_1$ ,  $S_6$ , and  $S_7$  targets was in fact absent in  
338 these populations (Fig 7).

339

340 We observed that the transfer frequencies of pCF10 and its derivatives were higher for all  
341 populations containing pAM714 (WT5-Erm, WT4-BHI, and WT4-Erm in Fig 7). We infer that  
342 pAM714 enhances pCF10 conjugation frequency via an unknown mechanism.

343

344 **Spacer deletion is not exclusively RecA-dependent.** Under antibiotic selection, the  
345 T11RF transconjugants lost  $S_6$  to resolve the conflict between CRISPR-Cas and its  
346 target. The loss of  $S_6$  was often coupled with the loss of surrounding spacers, ranging  
347 from  $S_1$  to  $S_{18}$  (Table 2). The rearrangements associated with shortened CRISPR3-Cas  
348 arrays occurred between repeat-spacer junctions leaving behind perfectly intact repeat-  
349 spacer-repeat sequences that are still of use as guides for CRISPR interference. This  
350 phenomenon led us to hypothesize that either homologous recombination or DNA  
351 replication slippage plays a role in eliminating  $S_6$  from the array. To study if homologous  
352 recombination had an impact on spacer loss, we constructed an in-frame deletion of  
353 *recA* in T11RF, generating strain T11RF  $\Delta recA$ . The pAM714 plasmid was introduced  
354 into T11RF  $\Delta recA$  through the same conjugation procedures described previously and  
355 two select transconjugants (*recA*.TC1 and *recA*.TC2) were serially passaged for 14 days  
356 with continuous erythromycin selection. The PCR analysis for the select transconjugant  
357 colonies indicated that *recA*.TC1 had a wild type CRISPR3-Cas array size while  
358 *recA*.TC2 had a shortened CRISPR3-Cas array (Fig 8). Using Sanger sequencing, we  
359 observed that *recA*.TC1 lost  $S_6$  after one day of passage in erythromycin, while the initial  
360 *recA*.TC2 colony had a deletion of  $S_6$ - $S_7$ . The same CRISPR3 alleles were detected by  
361 Sanger sequencing from day 14 erythromycin-passaged. These data demonstrate that  
362 spacer deletion can occur in the absence of *recA*, and implicates DNA replication  
363 slippage in the emergence of mutant CRISPR alleles.

364

365 **Mechanism of conflict resolution is not specific to *E. faecalis* T11RF or pAM714.**

366 We wanted to determine if our observations were limited to one host-plasmid pair.  
367 Therefore, we expanded our analysis to include *E. faecalis* OG1RF, which possesses a  
368 Type II CRISPR-Cas system, CRISPR1-Cas, that is related to but distinct from  
369 CRISPR3-Cas of T11RF (29, 44). Like all sequenced *E. faecalis* strains, OG1RF also  
370 possesses the orphan CRISPR2 array (Fig 1). Previous research demonstrated that the  
371 T11RF CRISPR2 array is active for genome defense in the presence of CRISPR1 *cas9*  
372 (37). We interpret this to mean that the orphan CRISPR2 locus can be used as a native  
373 genome defense system in *E. faecalis* OG1RF, due to the presence of endogenous  
374 CRISPR1-Cas which was recently demonstrated to provide genome defense (45).

375

376 We utilized the shuttle vector pLZ12, which confers chloramphenicol resistance, as a  
377 backbone for the generation of artificial OG1RF CRISPR1-Cas and CRISPR2  
378 protospacer targets (Table 1). The pKH12 plasmid does not natively contain a  
379 protospacer that would be targeted by either CRISPR1-Cas or CRISPR2 spacers (45).  
380 pKHS96 is a pKH12 derivative with an engineered CRISPR1-Cas protospacer that is  
381 targeted by OG1RF CRISPR1-Cas  $S_4$ . pKHS5 is a pKH12 derivative with an engineered  
382 CRISPR2 protospacer that is targeted by OG1RF CRISPR2  $S_6$ . The consensus PAM  
383 sequence for both CRISPR1-Cas and CRISPR2 is NGG (37) and was included adjacent  
384 to the engineered protospacers. pKH12, pKHS96 and pKHS5 were each transformed  
385 into electrocompetent OG1RF. Twenty random transformants for each plasmid were  
386 selected as templates for PCR to determine the initial integrity of the CRISPR1-Cas and  
387 CRISPR2 arrays using Sanger sequencing. We determined that the CRISPR1-Cas and  
388 CRISPR2 arrays were intact in all selected transformants, regardless of the plasmid that  
389 was transformed.

390



391 We randomly selected three transformants for each plasmid to be used for *in vitro*  
392 evolution experiments. Each transformant was passaged in plain BHI medium and BHI  
393 medium supplemented with chloramphenicol for a period of 14 days. Similar to our  
394 observations for T11RF pAM714 transconjugants, we observed loss of pKHS5 and  
395 pKHS96 over the course of passaging without antibiotic selection (Fig 9a).

396

397 CRISPR1 and CRISPR2 integrity was assessed for transformants on passage day 14  
398 (Fig 9b). For passages with selection, all pKHS96 transformants had reduced CRISPR1  
399 arrays, and two of three pKHS5 transformants had reduced CRISPR2 arrays, after 14  
400 days. Using Sanger sequencing, we confirmed that three pKHS96 transformants lost  
401 CRISPR1 S<sub>4</sub> while CRISPR2 remained intact, and two pKHS5 transformants lost  
402 CRISPR2 S<sub>6</sub> while CRISPR1 remained intact. The chloramphenicol-passaged pKHS5  
403 transformant without a visible reduction in the CRISPR2 amplicon size was confirmed to  
404 have a mixed spacer population. Sanger sequencing revealed mixed nucleotides with  
405 low sequencing quality overlapping S<sub>5</sub> and S<sub>6</sub>. This confirms that both OG1RF  
406 CRISPR1-Cas and CRISPR2 can become compromised when selection for CRISPR-  
407 targeted MGEs is present, which is consistent with what we observed in T11RF  
408 CRISPR3-Cas. Overall, we conclude that regardless of the CRISPR subtype involved or  
409 the nature of the plasmid (naturally occurring PRP or shuttle vector), spacer loss events  
410 occur under antibiotic selection for CRISPR-Cas targets in *E. faecalis*.

411

## 412 **Discussion**

413

414 It has been well documented that antibiotic use contributes to the dissemination of  
415 antibiotic resistance plasmids and the emergence of MDR organisms. However, bacteria  
416 encode genome defense systems such as CRISPR-Cas to reduce plasmid acquisition.

417 The interactions of CRISPR-Cas systems and naturally occurring resistance plasmids  
418 are poorly understood, as is the impact of selection (in this case, strong antibiotic  
419 selection) on these evolutionary interactions. This is of particular concern in the  
420 opportunistic pathogen *E. faecalis* due to its propensity to engage in intra- and  
421 interspecies HGT. Compromised CRISPR-Cas systems have been observed in MDR  
422 strains of *E. faecalis* (44), substantiating the hypothesis that compromised genome  
423 defense contributes to the evolution of MDR *E. faecalis*.

424

425 In our study, we used *in vitro* passaging experiments and deep sequencing analysis of  
426 CRISPR3 amplicons to study the dynamics of CRISPR-Cas and its plasmid target in  
427 transconjugants where these systems are in conflict. We find that the CRISPR3 array of  
428 T11RF populations is naturally heterogeneous in allelic structure, with most possible  
429 spacer deletion alleles occurring at low frequencies. When a CRISPR target is present,  
430 CRISPR-Cas eliminates its target from the population over time. However, when  
431 antibiotic selection for the target is present, CRISPR-Cas mutants emerge that allow the  
432 plasmid to be maintained. One would reason that the heterogeneity of a CRISPR array  
433 could be a result of either homologous recombination or slippage during DNA replication.  
434 Our results demonstrate that *recA* is not required for CRISPR compromise by spacer  
435 deletion. However, the fact that we observed flipped spacers, where  $x > y$  in 5'-S<sub>x</sub>RS<sub>y</sub>-3',  
436 indicates that homologous recombination likely does play a role. It is likely that both  
437 mechanisms contribute to the emergence of heterogeneous CRISPR alleles. We do not  
438 have an estimate of which process has a greater effect, nor whether additional stresses  
439 beyond antibiotic selection could influence rates for each. Moreover, we do not know  
440 whether sub-inhibitory antibiotic concentrations, fluctuating selection, and spatial  
441 heterogeneity could alter outcomes of these conflicts.

442

443 CRISPR arrays undergo dynamic evolution (46-51). The addition of new spacers into the  
444 leader end provides fresh immunity to newly evolved MGEs, while leader distal spacers  
445 act as molecular 'fossils' to track the evolutionary history of strains (50, 52). At the same  
446 time, CRISPR array expansion is not unlimited as internal spacers can be deleted,  
447 providing a basis for diversification and the emergence of heterogeneous bacterial  
448 populations with dynamic CRISPR array-allele variations (42, 45). Previously,  
449 researchers used mathematical modeling to estimate the rate of these deletion events to  
450 be around  $e^{-4}$  for a type III-A CRISPR-Cas system in *Staphylococcus epidermidis* (41).  
451 This study also concluded that the ability of a MGE to escape CRISPR-Cas defense was  
452 dependent on the existence of pre-existing CRISPR mutants in recipient populations.  
453 This is in contrast to our results, where functional CRISPR-Cas and its plasmid target  
454 can co-exist in conflict in *E. faecalis* cells, although over time, this conflict is resolved by  
455 either plasmid loss or the emergence of mutants with compromised CRISPR-Cas.

456

457 Our studies utilized pAM714, which encodes a toxin-antitoxin system (53-55). The  
458 system encodes a stable toxin that will kill daughter cells that have not inherited a  
459 plasmid copy; an unstable antitoxin is encoded from the same locus that blocks toxin  
460 translation in cells with proper plasmid segregation. However, in our study, we observed  
461 a gradual decrease of erythromycin-resistant cells when we passaged T11RF pAM714  
462 in BHI for 14 days, indicating that the toxin-antitoxin system does not have robust activity  
463 in our experiments. The fact that pAM714, pKHS67 and pKHS5 were also eliminated  
464 gradually over the passage and not immediately suggests that *E. faecalis* CRISPR-Cas  
465 systems either act slowly or are poorly expressed under laboratory conditions. An initial  
466 lag in Cas9 activation would explain the ability of pAM714 to become established in a  
467 subpopulation of CRISPR-Cas active cells. It is of interest to study the efficiency of

468 plasmid elimination in T11RF that overexpresses Cas9. It is also of interest to identify  
469 mechanisms of *cas9* expression regulation, about which little is known.

470

471 The work presented here contributes to an understanding of host-plasmid co-evolution  
472 and the emergence of MDR bacteria. Our work underscores the short- and long-term  
473 effects antibiotic usage has on the evolutionary trajectory of opportunistic pathogens. We  
474 hypothesize that the evolutionary outcomes of CRISPR-plasmid conflicts described in  
475 this study occur in other bacterial pathogens with Type II CRISPR-Cas systems, and that  
476 the specific outcomes observed will be a function of Cas9 expression and kinetics.

477

## 478 **Materials and Methods**

479

480 **Strains, reagents, and routine molecular biology procedures.** Bacterial strains and  
481 plasmids used in this study are listed in Table 1. *E. faecalis* strains were grown in Brain  
482 Heart Infusion (BHI) broth or on agar plates at 37°C unless otherwise noted. Antibiotics  
483 were used for *E. faecalis* at the following concentrations: erythromycin, 50 µg/mL;  
484 chloramphenicol, 15 µg/mL; streptomycin, 500 µg/mL; spectinomycin, 500 µg/mL;  
485 rifampicin, 50 µg/mL; fusidic acid, 25 µg/mL. *Escherichia coli* strains used for plasmid  
486 propagation and were grown in lysogeny broth (LB) broth or on agar plates at 37°C.  
487 Chloramphenicol was used at 15 µg/mL for *E. coli*. PCR was performed using *Taq* (New  
488 England Biolabs) or Phusion (Fisher Scientific) polymerases. Primer sequences used  
489 are in STable 1. Routine DNA sequencing was carried out at the Massachusetts General  
490 Hospital DNA core facility (Boston, MA). *E. faecalis* electrocompetent cells were made  
491 using the lysozyme method as previously described (56).

492

493 **Generation of mutant *E. faecalis* strains and plasmids.** In-frame deletion of *recA* in  
494 T11RF was generated using a previously established protocol (57). Briefly, ~750 bp  
495 regions up- and downstream of *recA* in *E. faecalis* T11RF were amplified, digested, and  
496 ligated into pLT06 (57) to generate pWH*recA*. The resulting plasmid was transformed  
497 into competent T11RF cells via electroporation (56). Following transformation at 30°C, a  
498 shift to the non-permissive temperature of 42°C and counterselection on p-chloro-  
499 phenylalanine were performed to generate an in-frame, markerless deletion.

500

501 To insert the T11 CRISPR3 spacer 1 (*S*<sub>1</sub>), *S*<sub>6</sub>, and *S*<sub>7</sub> sequences and CRISPR3 PAM  
502 (TTGTA) into pCF10, 47 bp and 39 bp single stranded DNA oligos were annealed to  
503 each other to generate dsDNA with restriction enzyme overhangs for *Bam*HI and *Pst*I.  
504 The annealed oligos were ligated into the pLT06 derivative pWH107 that includes  
505 sequence from pCF10 *uvrB*, to insert these sequences into the *uvrB* gene of pCF10 by  
506 homologous recombination. A knock-in protocol was performed as previously described  
507 (37).

508

509 **Conjugation experiments.** *E. faecalis* donor and recipient strains were grown in BHI  
510 overnight to stationary phase. A 1:10 dilution was made for both donor and recipient  
511 cultures in fresh BHI broth and incubated for 1.5 hr to reach mid-exponential phase. A  
512 mixture of 100 µL donor cells and 900 µL recipient cells was pelleted and plated on BHI  
513 agar to allow conjugation. After 18 h incubation, the conjugation mixture was scraped  
514 from the plate using 2 mL 1X PBS supplemented with 2 mM EDTA. Serial dilutions were  
515 prepared from the conjugation mixture and plated on selective BHI agars. After 24-48 h  
516 incubation, colony forming units per milliliter (CFU/mL) was determined using plates with  
517 30 - 300 colonies. The conjugation frequency was calculated as the CFU/mL of  
518 transconjugants divided by the CFU/mL of donors.

519

520 **Serial passage.** Transconjugant or transformant colonies were suspended in 50  $\mu$ L BHI  
521 broth. The 50  $\mu$ L suspension was used as follows: 3  $\mu$ L was used for PCR to confirm the  
522 integrity of the CRISPR array, 10  $\mu$ L was inoculated into plain BHI broth, another 10  $\mu$ L  
523 was inoculated into selective BHI broth for plasmid selection, and another 10  $\mu$ L was  
524 used for serial dilution and plating on selective medium to enumerate the initial number  
525 of plasmid-containing cells in the transconjugant colonies. Broth cultures were incubated  
526 for 24 h, followed by 1:1000 dilution into either fresh plain BHI or fresh selective BHI. At  
527 each 24 h interval, 3  $\mu$ L of each culture from the previous incubation was used for PCR  
528 to check CRISPR array integrity, and 10  $\mu$ L was used for serial dilution and plating on  
529 agars to determine CFU/mL for total viable cells and plasmid-containing cells. The  
530 cultures were passaged in this manner for 14 days; cryopreserved culture stocks were  
531 made daily in glycerol. To use the Day 14 transconjugant populations in conjugation  
532 reactions, the glycerol stocks were completely thawed on ice, and 20  $\mu$ L was inoculated  
533 into plain BHI broth. The cultures were incubated for 6-8 h to allow them to reach mid-  
534 exponential phase ( $OD_{600nm} \approx 0.5-0.7$ ), and 900  $\mu$ L was used as recipient in conjugation  
535 reactions as described above.

536

537 **Deep sequencing of CRISPR3 amplicons and genomic DNA.** For CRISPR3 amplicon  
538 sequencing, 3  $\mu$ L from a broth culture was used as template in PCR using Phusion  
539 Polymerase with CR3\_seq\_F/R primers (STable1). The PCR products were purified  
540 using the Thermo Scientific PCR purification kit (Thermo Scientific). Genomic DNA was  
541 isolated using the phenol-chloroform method (58). The purified PCR amplicons and  
542 genomic DNA samples were sequenced using 2 x 150 bp paired end sequencing  
543 chemistry by Molecular Research LP (MR DNA; Texas).

544

545 **Whole genome sequencing analysis.** T11 supercontig and pAD1 plasmid contig  
546 references were downloaded from NCBI (accession numbers: T11: NZ\_GG688637.1-  
547 NZ\_GG688649; pAD1: AB007844, AF394225, AH011360, L01794, L19532, L37110,  
548 M84374, M87836, U00681, X17214, X62657, X62658). Reads were aligned to these  
549 references using default parameters in CLC Genomics Workbench (Qiagen) where  
550  $\geq 50\%$  of each mapped read has  $\geq 80\%$  sequence identity to the reference. Variations  
551 occurring with  $\geq 35\%$  frequency at positions with  $\geq 10X$  coverage between our samples  
552 and the reference contigs were detected using the Basic Variant Detector. At the same  
553 time, local realignment was performed, followed by Fixed Ploidy variant detection using  
554 default parameters and variants probability  $\geq 90\%$  in CLC Genomics Workbench. The  
555 basic variants and fixed ploidy variants were combined for each sequencing sample and  
556 subjected to manual inspection. The variants that were detected in the T11 genome from  
557 all samples were inferred to be variants in our parent T11 stock and were manually  
558 removed. The variants that were detected in pAD1 genome from all transconjugant  
559 samples were inferred to be variants in our pAM714 stock, hence were also manually  
560 removed. Next, variants within the CRISPR3 array were removed as we analyzed  
561 CRISPR3 alleles using a different approach (amplicon deep sequencing; see below). All  
562 variants detected from all populations were manually checked for coverage depth to  
563 eliminate the detection bias. The variants detected in all samples are shown in STable2.

564

565 **Analysis of CRISPR3 amplicon sequencing.** Reads from the 1,763 bp CRISPR3  
566 amplicon were mapped to the T11 CRISPR3 reference (NZ\_GG688647.1, positions  
567 646834 - 648596) using stringent mapping conditions in CLC Genomics Workbench.  
568 The stringent mapping conditions require 100% of each mapped read to have  $\geq 95\%$   
569 identity to the reference. The percent mapped reads were calculated by dividing the  
570 number of reads mapped by the total number of reads, these percentages are listed in

571 STable3, step 1. The coverage depth was then calculated for each position within the  
572 PCR amplicon region using CLC Genomics Workbench, normalized using reads per  
573 million, and plotted against reference positions (Fig 4).

574

575 To further analyze CRISPR3 spacer deletions and rearrangements, we manually created  
576 CRISPR3 references. The CRISPR3 amplicon references contain two spacers  
577 connected by a T11 CRISPR3-Cas repeat: 5'-spacer[x]-repeat-spacer[y]-3' (5'-S<sub>x</sub>RSy-  
578 3'), where spacer[x] and spacer[y] could be 30 bp upstream of the first repeat (leader  
579 end; or S<sub>0</sub> hereafter; Fig 1a), or any internal spacer within the CRISPR3 array (from  
580 spacer 1 to spacer 21; or S<sub>1</sub> to S<sub>21</sub>; Fig 1a). Each manually generated CRISPR3  
581 amplicon reference is 96 bp in length. The references where y=x+1 represent wild-type  
582 alleles. The terminal repeat following S<sub>21</sub> in the CRISPR3 array is divergent from the  
583 regular direct repeat sequence, so references containing 5'-spacer[x]-TerminalRepeat-  
584 S<sub>T</sub>-3' (5'-S<sub>x</sub>TRS<sub>T</sub>-3') were constructed, where spacer[x] ranges from S<sub>0</sub> to S<sub>21</sub> and spacer  
585 S<sub>T</sub> represents the sequence 30 bp downstream of the terminal repeat (Fig 1a). The 5'-  
586 S<sub>21</sub>TRS<sub>T</sub>-3' reference represents the wild-type. In total, 484 references with length of 96  
587 bp were generated for the CRISPR3 amplicon. Considering that the read length is 150  
588 bp, we manually split each read into two subsequences (one subsequence was 75 bp;  
589 with the remainder of the read being the second subsequence) to enhance mapping  
590 efficiency, allowing for retrieval of maximal sequence information. The split amplicon  
591 sequencing reads were mapped to the 5'-S<sub>x</sub>RSy-3' and 5'-S<sub>x</sub>TRS<sub>T</sub>-3' references using  
592 stringent mapping parameters in CLC Genomics Workbench (Qiagen). The stringent  
593 mapping parameters require 100% of each mapped read to be ≥95% identical to one  
594 unique reference. Thus, the sequencing reads from different CRISPR alleles will be  
595 distinguished. These amplicon mapping results were applied to the calculation of forward  
596 spacer deletion and backward spacer rearrangement rates.



597

598 To further evaluate the mapping efficiency, the unmapped reads from initial mapping to  
599 the T11 CRISPR3 reference (STable3, step 1) were subjected to additional quality  
600 control analysis. The unmapped reads were mapped to the 484 manually created  
601 spacer[x]-repeat-spacer[y] references using the same mapping parameters in CLC as  
602 above (STable3, step 2 mapping; ignore unspecific mapping). The unmapped reads  
603 from step 2 were subjected to mapping to all possible references (CRISPR3 region plus  
604 manually created references) using default mapping parameters, ignoring unspecific  
605 mapping (80% of each mapped read has at least 50% identity to the reference  
606 sequence; STable3, step 3 mapping). The unmapped reads from step 3 were mapped to  
607 all possible references using the default mapping parameters and randomly map  
608 unspecific matching reads (STable3, step 4 mapping).

609

610 **Forward spacer deletion and backward spacer rearrangement.** We observed two  
611 categories of mutant CRISPR3 alleles: 5'-S<sub>x</sub>RS<sub>y</sub>-3' (y > x+1) and 5'-S<sub>x</sub>RS<sub>y</sub>-3' (y < x). The  
612 forward deletion mutants with 5'-S<sub>x</sub>RS<sub>y</sub>-3' (y > x+1) are the result of spacer deletions,  
613 with spacers from S<sub>x+1</sub> to S<sub>y-1</sub> deleted; while the backward rearrangement mutants with  
614 5'-S<sub>x</sub>RS<sub>y</sub>-3' (y < x) are the result of spacer rearrangement, where a downstream spacer  
615 S<sub>y</sub> flips to become upstream of an upstream spacer S<sub>x</sub>. To study if there were positional  
616 preferences, the average forward spacer deletion rate and backward spacer  
617 rearrangement rate was calculated for each 5'-S<sub>x</sub> (0 < x < 21) within the CRISPR3 array.  
618 For each 5'-S<sub>x</sub>, the average forward deletion and backward rearrangement rate are  
619 calculated as:

620 P(5'-S<sub>x</sub> Forward)

621 
$$= \frac{\text{\# mapped reads to the reference of } 5'\text{-S}_x\text{RS}_y\text{-3'}}{\sum_{y=x+1}^n \text{\# mapped reads to the references of } 5'\text{-S}_x\text{RS}_y\text{-3' and } 5'\text{-S}_n\text{TRST-3'}}$$

622 
$$P(5'\text{-Sx Backward}) = \frac{\# \text{ mapped reads to the reference of } 5'\text{-SxRSy-3}'}{\sum_{y=0}^{x-1} \# \text{ mapped reads to the references of } 5'\text{-SxRSy-3}'}$$

623 where  $n$  is the total number of spacers within a CRISPR array, hence  $S_n$  represents  
624 terminal spacer, as described above (Fig 1a).

625

### 626 **Acknowledgements**

627 This work was supported by Public Health Service grant R01AI116610 to K.L.P and the  
628 Cecil H. and Ida Green Chairship to M.Q.Z. We thank Karthik Hullahalli for construction  
629 of pKH12 and its derivatives. We thank Dr. Chen Jia for consultation on data analysis  
630 methods.

631

### 632 **Competing Interests**

633 The authors declare no competing interests.

634

## 635 References

- 636 1. Hegstad K, Mikalsen T, Coque T, Werner G, & Sundsfjord A (2010) Mobile  
637 genetic elements and their contribution to the emergence of antimicrobial  
638 resistant *Enterococcus faecalis* and *Enterococcus faecium*. *Clinical microbiology*  
639 *and infection* 16(6):541-554.
- 640 2. Huycke MM, Sahm DF, & Gilmore MS (1998) Multiple-drug resistant enterococci:  
641 the nature of the problem and an agenda for the future. *Emerging infectious*  
642 *diseases* 4(2):239.
- 643 3. Kristich CJ, Rice LB, & Arias C, A (2014) Enterococcal Infection-Treatment and  
644 Antibiotic Resistance. *Enterococci: From Commensals to Leading Causes of*  
645 *Drug Resistant Infection*.
- 646 4. Palmer KL, Kos VN, & Gilmore MS (2010) Horizontal gene transfer and the  
647 genomics of enterococcal antibiotic resistance. *Current opinion in microbiology*  
648 13(5):632-639.
- 649 5. Uttley A, George R, Naidoo J, Woodford N, Johnson A, *et al.* (1989) High-level  
650 vancomycin-resistant enterococci causing hospital infections. *Epidemiology &*  
651 *Infection* 103(1):173-181.
- 652 6. Clewell DB, Weaver KE, Dunny GM, Coque TM, Francia MV, *et al.* (2014)  
653 Extrachromosomal and Mobile Elements in Enterococci: Transmission,  
654 Maintenance, and Epidemiology. *Enterococci: From Commensals to Leading*  
655 *Causes of Drug Resistant Infection*.
- 656 7. Dunny GM (2007) The peptide pheromone-inducible conjugation system of  
657 *Enterococcus faecalis* plasmid pCF10: cell-cell signalling, gene transfer,  
658 complexity and evolution. *Philosophical transactions of the Royal Society of*  
659 *London. Series B, Biological sciences* 362(1483):1185-1193.
- 660 8. Gilmore MS, Segarra RA, Booth MC, Bogie CP, Hall LR, *et al.* (1994) Genetic  
661 structure of the *Enterococcus faecalis* plasmid pAD1-encoded cytolytic toxin  
662 system and its relationship to lantibiotic determinants. *J Bacteriol* 176(23):7335-  
663 7344.
- 664 9. Clewell DB (2007) Properties of *Enterococcus faecalis* plasmid pAD1, a member  
665 of a widely disseminated family of pheromone-responding, conjugative, virulence  
666 elements encoding cytolsin. *Plasmid* 58(3):205-227.

- 667 10. Dunny GM (2013) Enterococcal sex pheromones: signaling, social behavior, and  
668 evolution. *Annual review of genetics* 47:457-482.
- 669 11. Jasni AS, Mullany P, Hussain H, & Roberts AP (2010) Demonstration of  
670 conjugative transposon (Tn5397)-mediated horizontal gene transfer between  
671 *Clostridium difficile* and *Enterococcus faecalis*. *Antimicrobial agents and*  
672 *chemotherapy* 54(11):4924-4926.
- 673 12. Showsh SA, De Boever EH, & Clewell DB (2001) Vancomycin resistance plasmid  
674 in *Enterococcus faecalis* that encodes sensitivity to a sex pheromone also  
675 produced by *Staphylococcus aureus*. *Antimicrobial agents and chemotherapy*  
676 45(7):2177-2178.
- 677 13. Zhu W, Murray PR, Huskins WC, Jernigan JA, McDonald LC, *et al.* (2010)  
678 Dissemination of an *Enterococcus* Inc18-Like vanA plasmid associated with  
679 vancomycin-resistant *Staphylococcus aureus*. *Antimicrobial agents and*  
680 *chemotherapy* 54(10):4314-4320.
- 681 14. Tsvetkova K, Marvaud J-C, & Lambert T (2010) Analysis of the mobilization  
682 functions of the vancomycin resistance transposon Tn1549, a member of a new  
683 family of conjugative elements. *Journal of bacteriology* 192(3):702-713.
- 684 15. Andersson DI & Levin BR (1999) The biological cost of antibiotic resistance.  
685 *Current opinion in microbiology* 2:489-493.
- 686 16. De Gelder L, Ponciano JM, Joyce P, & Top EM (2007) Stability of a promiscuous  
687 plasmid in different hosts: no guarantee for a long-term relationship. *Microbiology*  
688 153(2):452-463.
- 689 17. Harrison E & Brockhurst MA (2012) Plasmid-mediated horizontal gene transfer is  
690 a coevolutionary process. *Trends in microbiology* 20(6):262-267.
- 691 18. Sota M, Yano H, Hughes J, Daughdrill GW, Abdo Z, *et al.* (2010) Shifts in Host  
692 Range of a Promiscuous Plasmid through Parallel Evolution of its Replication  
693 Initiation Protein. *The ISME journal* 4(12):1568.
- 694 19. Hultner N, Ilhan J, Wein T, Kadibalban AS, Hammerschmidt K, *et al.* (2017) An  
695 evolutionary perspective on plasmid lifestyle modes. *Current opinion in*  
696 *microbiology* 38:74-80.
- 697 20. Gandon S & Vale PF (2014) The evolution of resistance against good and bad  
698 infections. *J Evol Biol* 27(2):303-312.

- 699 21. Stalder T, Rogers LM, Renfrow C, Yano H, Smith Z, *et al.* (2017) Emerging  
700 patterns of plasmid-host coevolution that stabilize antibiotic resistance. *Scientific*  
701 *reports* 7(1):4853.
- 702 22. Harrison E, Guymer D, Spiers AJ, Paterson S, & Brockhurst MA (2015) Parallel  
703 compensatory evolution stabilizes plasmids across the parasitism-mutualism  
704 continuum. *Current biology : CB* 25(15):2034-2039.
- 705 23. Hughes JM, Lohman BK, Deckert GE, Nichols EP, Settles M, *et al.* (2012) The  
706 role of clonal interference in the evolutionary dynamics of plasmid-host  
707 adaptation. *mBio* 3(4):e00077-00012.
- 708 24. Makarova KS, Wolf YI, Alkhnbashi OS, Costa F, Shah SA, *et al.* (2015) An  
709 updated evolutionary classification of CRISPR-Cas systems. *Nature reviews.*  
710 *Microbiology* 13(11):722-736.
- 711 25. Marraffini LA (2015) CRISPR-Cas immunity in prokaryotes. *Nature* 526(7571):55-  
712 61.
- 713 26. Bolotin A, Quinquis B, Sorokin A, & Ehrlich SD (2005) Clustered regularly  
714 interspaced short palindrome repeats (CRISPRs) have spacers of  
715 extrachromosomal origin. *Microbiology* 151(Pt 8):2551-2561.
- 716 27. Mojica FJ, Diez-Villasenor C, Garcia-Martinez J, & Soria E (2005) Intervening  
717 sequences of regularly spaced prokaryotic repeats derive from foreign genetic  
718 elements. *Journal of molecular evolution* 60(2):174-182.
- 719 28. Pourcel C, Salvignol G, & Vergnaud G (2005) CRISPR elements in *Yersinia*  
720 *pestis* acquire new repeats by preferential uptake of bacteriophage DNA, and  
721 provide additional tools for evolutionary studies. *Microbiology* 151(Pt 3):653-663.
- 722 29. Bourgeois A, Garsin DA, Qin X, Singh KV, Sillanpaa J, *et al.* (2008) Large scale  
723 variation in *Enterococcus faecalis* illustrated by the genome analysis of strain  
724 OG1RF. *Genome biology* 9(7):R110.
- 725 30. Heler R, Samai P, Modell JW, Weiner C, Goldberg GW, *et al.* (2015) Cas9  
726 specifies functional viral targets during CRISPR-Cas adaptation. *Nature*  
727 519(7542):199-202.
- 728 31. Wei Y, Terns RM, & Terns MP (2015) Cas9 function and host genome sampling  
729 in Type II-A CRISPR-Cas adaptation. *Genes & development* 29(4):356-361.

- 730 32. Chylinski K, Le Rhun A, & Charpentier E (2013) The tracrRNA and Cas9 families  
731 of type II CRISPR-Cas immunity systems. *RNA biology* 10(5):726-737.
- 732 33. Deltcheva E, Chylinski K, Sharma CM, Gonzales K, Chao Y, *et al.* (2011)  
733 CRISPR RNA maturation by trans-encoded small RNA and host factor RNase III.  
734 *Nature* 471(7340):602-607.
- 735 34. Anders C, Niewoehner O, Duerst A, & Jinek M (2014) Structural basis of PAM-  
736 dependent target DNA recognition by the Cas9 endonuclease. *Nature*  
737 513(7519):569-573.
- 738 35. Nishimasu H, Ran FA, Hsu PD, Konermann S, Shehata SI, *et al.* (2014) Crystal  
739 structure of Cas9 in complex with guide RNA and target DNA. *Cell* 156(5):935-  
740 949.
- 741 36. Sternberg SH, Redding S, Jinek M, Greene EC, & Doudna JA (2014) DNA  
742 interrogation by the CRISPR RNA-guided endonuclease Cas9. *Nature*  
743 507(7490):62-67.
- 744 37. Price VJ, Huo W, Sharifi A, Palmer KL, & Fey PD (2016) CRISPR-Cas and  
745 Restriction-Modification Act Additively against Conjugative Antibiotic Resistance  
746 Plasmid Transfer in *Enterococcus faecalis*. *mSphere* 1(3):e00064-00016.
- 747 38. Clewell D, Tomich P, Gawron-Burke M, Franke A, Yagi Y, *et al.* (1982) Mapping  
748 of *Streptococcus faecalis* plasmids pAD1 and pAD2 and studies relating to  
749 transposition of Tn917. *Journal of Bacteriology* 152(3):1220-1230.
- 750 39. Ike Y, Clewell D, Segarra R, & Gilmore M (1990) Genetic analysis of the pAD1  
751 hemolysin/bacteriocin determinant in *Enterococcus faecalis*: Tn917 insertional  
752 mutagenesis and cloning. *Journal of bacteriology* 172(1):155-163.
- 753 40. Gudbergdottir S, Deng L, Chen Z, Jensen JV, Jensen LR, *et al.* (2011) Dynamic  
754 properties of the *Sulfolobus* CRISPR/Cas and CRISPR/Cmr systems when  
755 challenged with vector - borne viral and plasmid genes and protospacers.  
756 *Molecular microbiology* 79(1):35-49.
- 757 41. Jiang W, Maniv I, Arain F, Wang Y, Levin BR, *et al.* (2013) Dealing with the  
758 evolutionary downside of CRISPR immunity: bacteria and beneficial plasmids.  
759 *PLoS genetics* 9(9):e1003844.
- 760 42. Lopez - Sanchez MJ, Sauvage E, Da Cunha V, Clermont D, Ratsima Hariniaina  
761 E, *et al.* (2012) The highly dynamic CRISPR1 system of *Streptococcus*

- 762 *agalactiae* controls the diversity of its mobilome. *Molecular microbiology*  
763 85(6):1057-1071.
- 764 43. Dunny G, Yuhasz M, & Ehrenfeld E (1982) Genetic and physiological analysis of  
765 conjugation in *Streptococcus faecalis* *Journal of Bacteriology* 151(2):855-859.
- 766 44. Palmer KL & Gilmore MS (2010) Multidrug-resistant enterococci lack CRISPR-  
767 cas. *mBio* 1(4).
- 768 45. Hullahalli K, Rodrigues M, & Palmer KL (2017) Exploiting CRISPR-Cas to  
769 manipulate *Enterococcus faecalis* populations. *eLife* 6.
- 770 46. Andersson AF & Banfield JF (2008) Virus population dynamics and acquired  
771 virus resistance in natural microbial communities. *Science* 320(5879):1047-1050.
- 772 47. Bzymek M & Lovett ST (2001) Instability of repetitive DNA sequences: the role of  
773 replication in multiple mechanisms. *Proceedings of the National Academy of*  
774 *Sciences* 98(15):8319-8325.
- 775 48. Erdmann S & Garrett RA (2012) Selective and hyperactive uptake of foreign DNA  
776 by adaptive immune systems of an archaeon via two distinct mechanisms.  
777 *Molecular microbiology* 85(6):1044-1056.
- 778 49. Iranzo J, Lobkovsky AE, Wolf YI, & Koonin EV (2013) Evolutionary dynamics of  
779 the prokaryotic adaptive immunity system CRISPR-Cas in an explicit ecological  
780 context. *Journal of bacteriology* 195(17):3834-3844.
- 781 50. Louwen R, Horst-Kreft D, de Boer AG, van der Graaf L, de Knecht G, *et al.* (2013)  
782 A novel link between *Campylobacter jejuni* bacteriophage defence, virulence and  
783 Guillain-Barre syndrome. *European journal of clinical microbiology & infectious*  
784 *diseases : official publication of the European Society of Clinical Microbiology*  
785 32(2):207-226.
- 786 51. Tyson GW & Banfield JF (2008) Rapidly evolving CRISPRs implicated in  
787 acquired resistance of microorganisms to viruses. *Environmental microbiology*  
788 10(1):200-207.
- 789 52. Hullahalli K, Rodrigues M, Schmidt BD, Li X, Bhardwaj P, *et al.* (2015)  
790 Comparative Analysis of the Orphan CRISPR2 Locus in 242 *Enterococcus*  
791 *faecalis* Strains. *PloS one* 10(9):e0138890.

- 792 53. Greenfield TJ & Weaver KE (2000) Antisense RNA regulation of the pAD1 *par*  
793 post-segregational killing system requires interaction at the 5' and 3' ends of the  
794 RNAs. *Molecular microbiology* 37(3):661-670.
- 795 54. Weaver KE & Clewell DB (1989) Construction of *Enterococcus faecalis* pAD1  
796 Miniplasmids: Identification of a Minimal Pheromone Response Regulatory  
797 Region and Evaluation of a Novel Pheromone-Dependent Growth Inhibition.  
798 *Plasmid* 22:106-119.
- 799 55. Weaver KE & Tritle DJ (1994) Identification and Characterization of an  
800 *Enterococcus faecalis* Plasmid pAD1-Encoded Stability Determinant Which  
801 Produces Two Small RNA Molecules Necessary for Its Function. *Plasmid*  
802 32:168-181.
- 803 56. Bae T, Kozlowicz B, & Dunny GM (2002) Two targets in pCF10 DNA for PrgX  
804 binding: their role in production of Qa and prgX mRNA and in regulation of  
805 pheromone-inducible conjugation. *Journal of molecular biology* 315(5):995-1007.
- 806 57. Thurlow LR, Thomas VC, & Hancock LE (2009) Capsular polysaccharide  
807 production in *Enterococcus faecalis* and contribution of CpsF to capsule  
808 serospecificity. *Journal of bacteriology* 191(20):6203-6210.
- 809 58. Manson JM, Keis S, Smith JM, & Cook GM (2003) A clonal lineage of VanA-type  
810 *Enterococcus faecalis* predominates in vancomycin-resistant enterococci isolated  
811 in New Zealand. *Antimicrobial agents and chemotherapy* 47(1):204-210.
- 812 59. Gold OG, Jordan H, & Van Houte J (1975) The prevalence of enterococci in the  
813 human mouth and their pathogenicity in animal models. *Archives of Oral Biology*  
814 20(7):473IN415-477.
- 815 60. Clewell DB, Tomich PK, Gawron-Burke MC, Franke AE, Yagi Y, *et al.* (1982)  
816 Mapping of *Streptococcus faecalis* plasmids pAD1 and pAD2 and studies relating  
817 to transposition of Tn917 *Journal of Bacteriology* 152(3):1220-1230.
- 818 61. Perez-Casal J, Caparon M, & Scott J (1991) Mry, a trans-acting positive regulator  
819 of the M protein gene of *Streptococcus pyogenes* with similarity to the receptor  
820 proteins of two-component regulatory systems. *Journal of Bacteriology*  
821 173(8):2617-2624.  
822
- 823



824

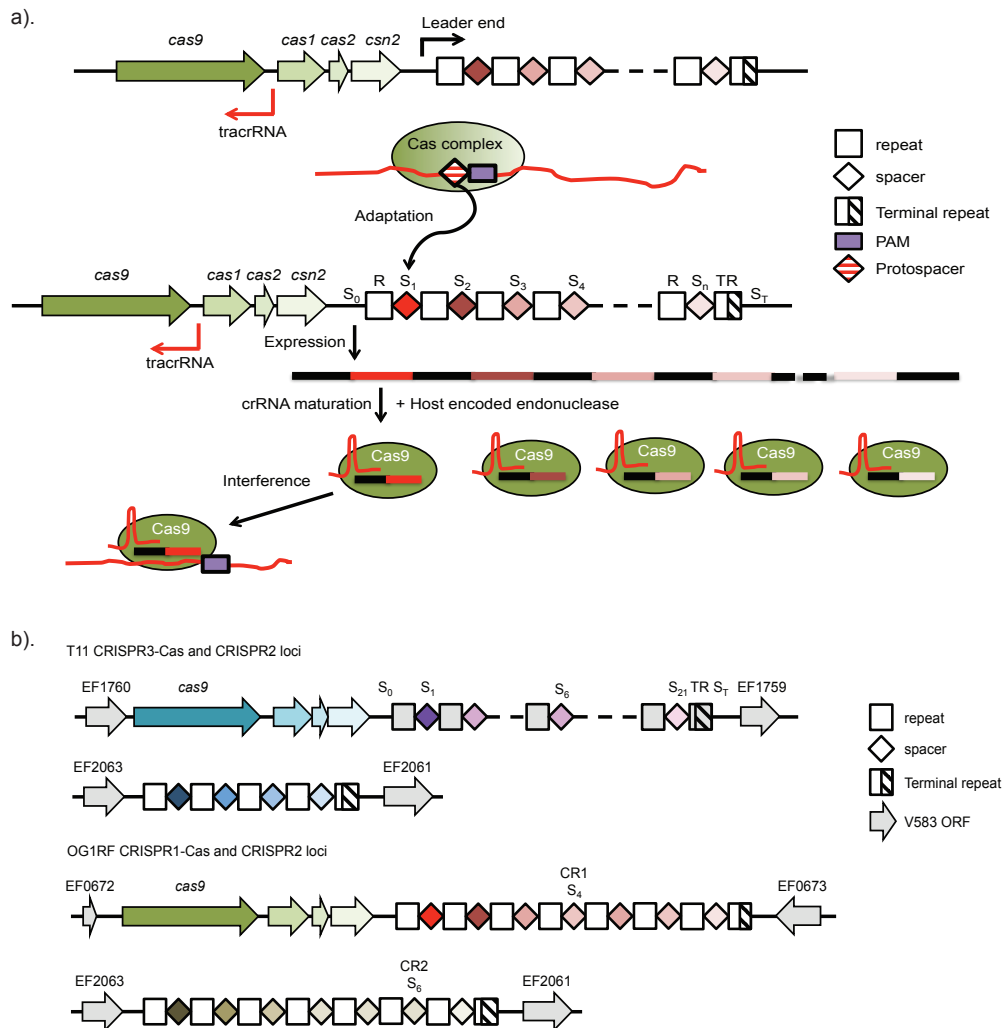

825

826

827

828 **Figure 1. *E. faecalis* possesses two Type II CRISPR-Cas systems and one orphan**

829 **CRISPR.** a) Schematic mechanism of Type II CRISPR-Cas defense in bacteria. Upon

830 MGE invasion, CRISPR-Cas acts as a genome defense system. When a new MGE is

831 encountered, the protospacer is recognized based on Protospacer Adjacent Motif

832 (PAM). A complex of Cas proteins incorporates the protospacer into the leader end of

833 CRISPR array to form a new spacer (Adaptation). During the expression stage, the

834 CRISPR array is transcribed into pre-crRNA, which is further processed into mature

835 crRNA by Cas9, tracrRNA and a host-encoded endonuclease. The mature crRNA

836 consists of part of a repeat and part of a spacer, which is bound to a Cas9:tracrRNA

837 complex to form an effector complex. When the previously encountered MGE invades

838 again, the effector complex recognizes the target by sequence complementarity and the

839 presence of a PAM. Upon recognition, the target is cleaved and thus invasion by the

840 MGE is blocked. The definition of R, TR and S<sub>n</sub> is described in Material and Methods. b).

841 CRISPR-Cas loci occurring in *E. faecalis* T11RF and OG1RF. *E. faecalis* T11RF

842 encodes a CRISPR3-Cas system and a CRISPR2 array. S<sub>6</sub> within the CRISPR3 array

843 targets pAM714 and pWH107.S6, while S<sub>1</sub> and S<sub>7</sub> within CRISPR3 array target

844 pWH107.S1 and pWH107.S7, respectively. *E. faecalis* OG1RF encodes a CRISPR1-

845 Cas system and a CRISPR2 array. S<sub>4</sub> within CRISPR1 array targets pKHS96, while S<sub>6</sub>

within CRISPR2 array targets pKHS5.

845

846

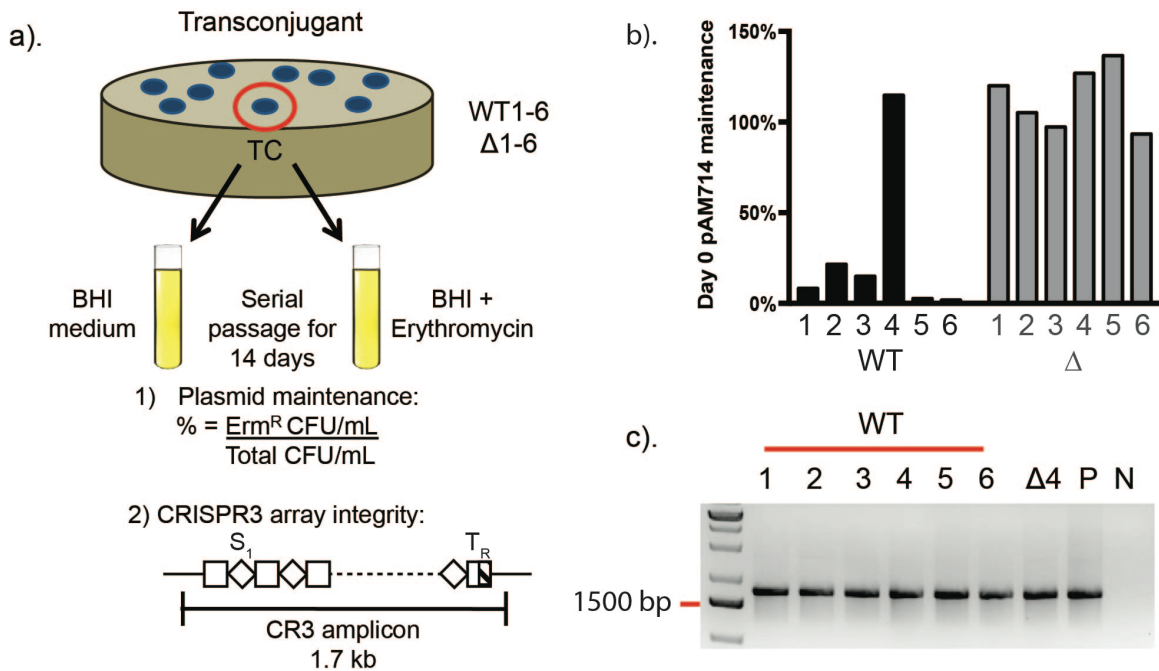

847

848

849

850

851

852

853

854

855

856

857

858

859

860

861

**Figure 2. Design of *in vitro* evolution experiment and initial plasmid carriage and CRISPR-Cas phenotypes of select transconjugants.** a) Design of *in vitro* evolution assay. Randomly selected T11RF pAM714 and T11RFΔcas9 pAM714 transconjugants were passaged for 14 days in the presence and absence of antibiotic selection for pAM714. These populations were monitored daily for: 1) pAM714 maintenance by determining the percentage of the population that was erythromycin-resistant, and 2) deviations in the CRISPR3 array by amplifying the 1.7 kb region encompassing the CRISPR3 array. b) Frequency of pAM714 carriage in transconjugant colonies used to initiate serial passage experiments. c) CRISPR3 amplicon PCR results for transconjugant colonies used to initiate serial passage experiments. Shown are CRISPR3 amplicon sizes for six T11RF pAM714 transconjugants (WT 1-6), a representative T11RFΔcas9 pAM714 transconjugant (Δ4), T11RF genomic DNA as a positive control (P), and a reagent control (N).

862

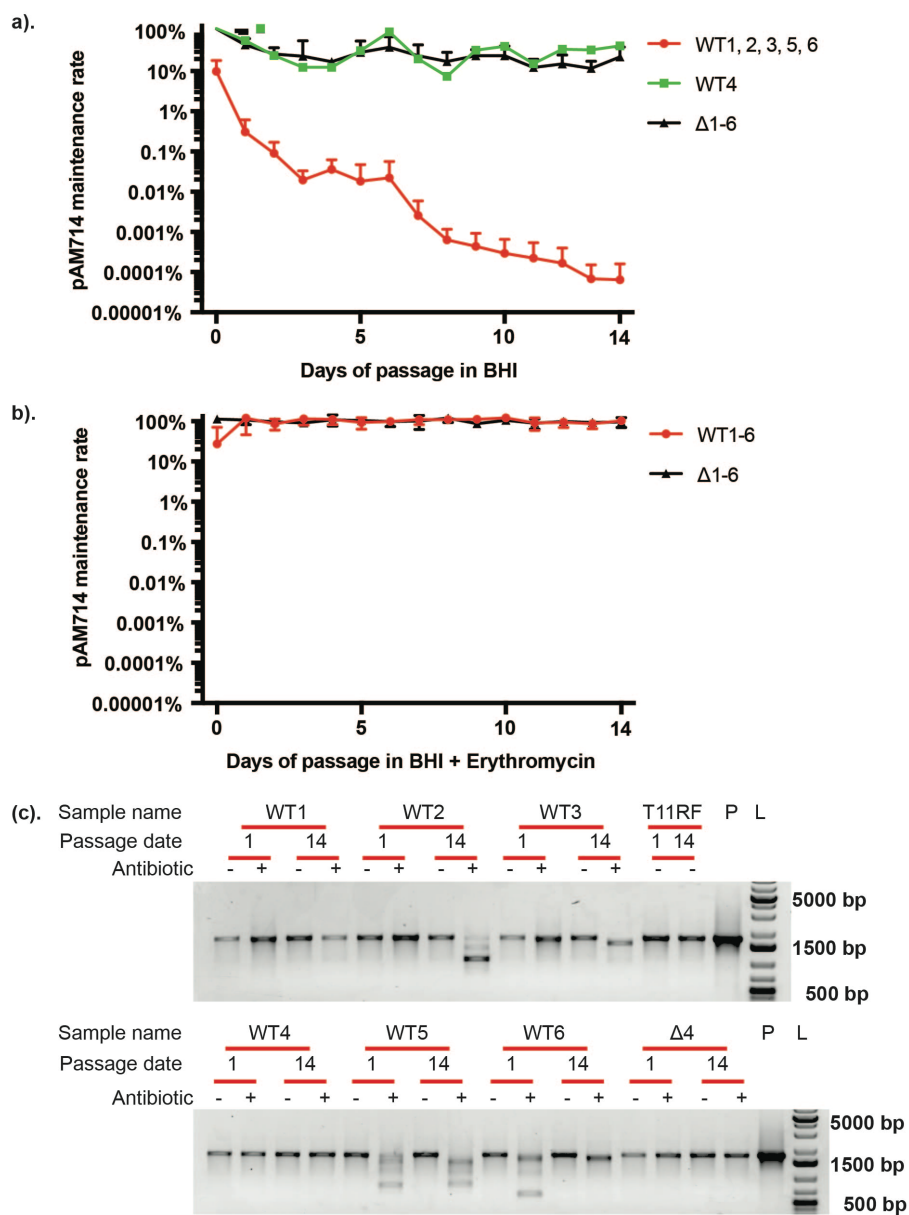

863

864

865 **Figure 3. Antibiotic selection-specific phenotypes reflect outcomes of plasmid-**

866 **host interactions.** a-b) pAM714 maintenance over the course of passage without (a)

867 and with (b) antibiotic selection. Plasmid maintenance is expressed as percentage of

868 bacterial cells conferring erythromycin resistance. WT populations are shown in green or

869 red and  $\Delta cas9$  populations are shown in black. c) CRISPR3 amplicon size from early

870 (Day 1) and late (Day 14) passage dates for six WT transconjugant populations and a

871 representative  $\Delta cas9$  transconjugant population ( $\Delta 4$ ). As a control, T11RF without

872 pAM714 was passaged for 14 days and the CRISPR3 locus was queried (T11RF). P:

873 positive control, T11RF genomic DNA. L: DNA ladder.

874

875 The following figure supplement is available for Figure 3:

876 **Figure supplement 1.** Gel electrophoresis of CRISPR3 amplicons in T11RF pAM714

877 transconjugants over 14 days passaged with and without antibiotic.

877

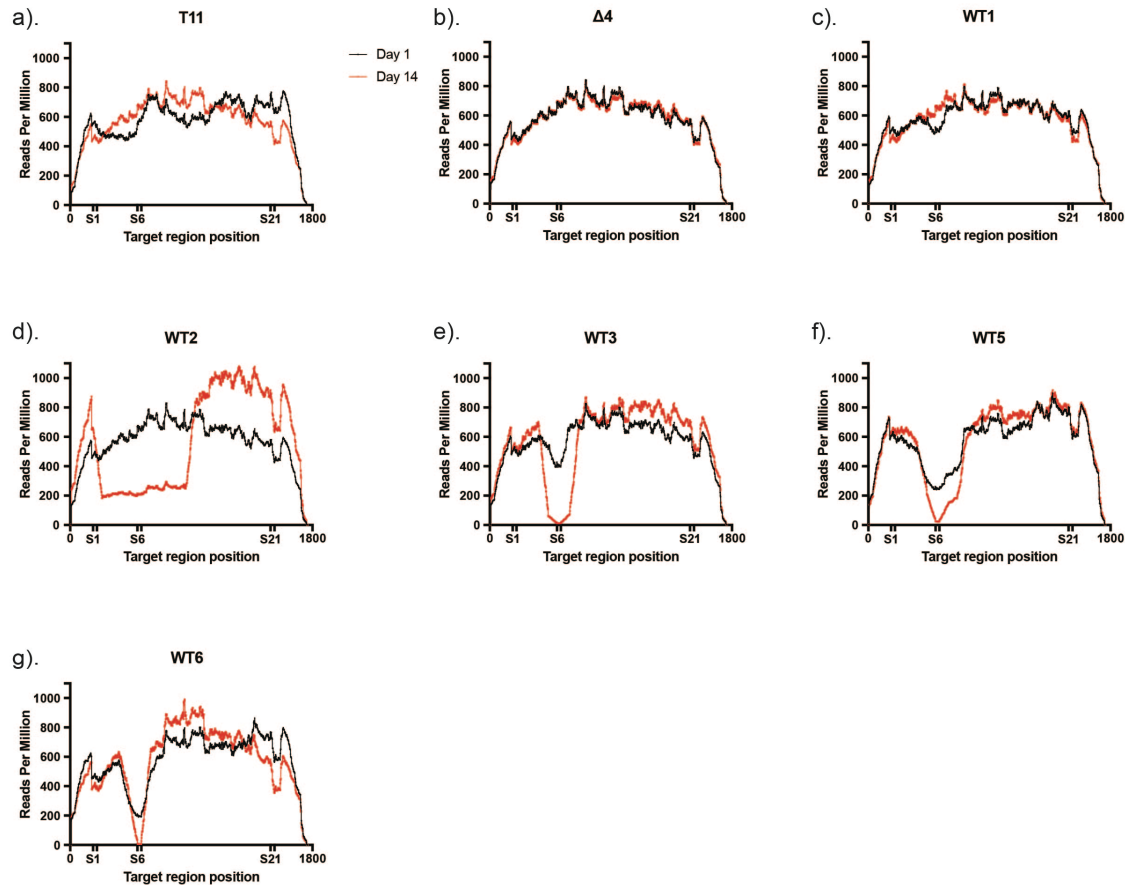

878

879

880

881

882

883

884

885

886

887

888

889

890

891

892

893

**Figure 4. Targeted sequencing revealed stochastic spacer loss after passage in antibiotic.** The coverage depth is calculated for each position within the amplicon and normalized using reads per million, which is then plotted against the genomic position. For each sample, the results for Day 1 and Day 14 are represented in black and red lines, respectively. The beginning and end of the regions along the amplicon corresponding to S<sub>1</sub>, S<sub>6</sub> and S<sub>21</sub> within the CRISPR3 array are labeled with vertical hash marks on the x-axis. a) BHI passaged T11RF parent strain. b) Erythromycin passaged  $\Delta 4$  transconjugant. c-g) Erythromycin passaged WT transconjugants. Here, the WT4 population is not included due to the inactivating *cas9* mutation, as discussed in the main text.

The following source data is available for Figure 4:

**Figure 4 - Source data 1.** Coverage depth mapping report for each position within the CRISPR3 amplicon.

894

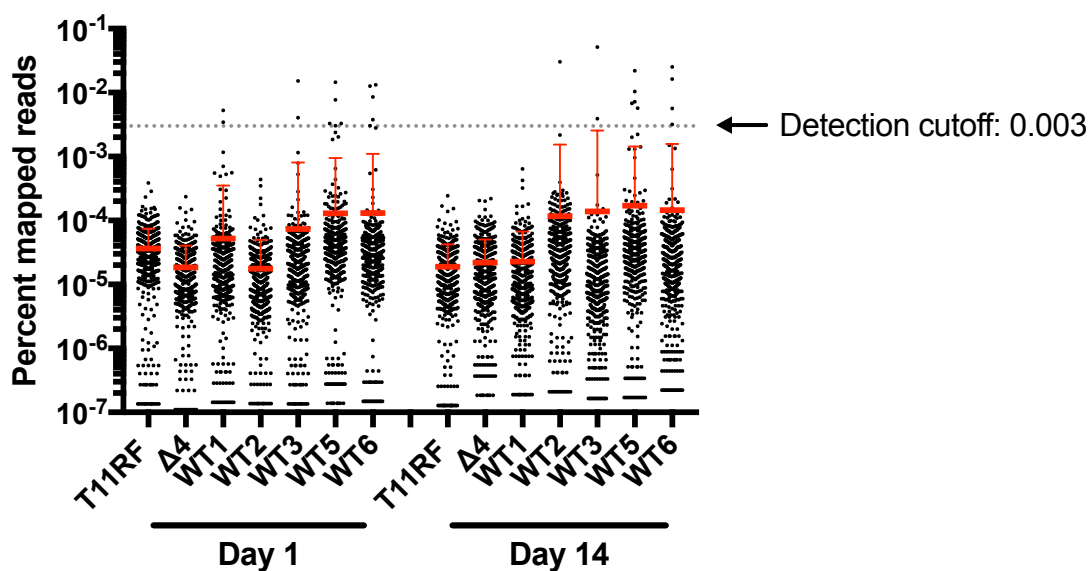

895

896

897 **Figure 5. Distribution of mutant CRISPR3 array alleles among antibiotic-passaged**

898 **wild-type transconjugants.** Percent mapped reads were calculated for each artificial

899 reference by dividing mapped reads at each position to the total number of mapped reads.

900 The percent mapped reads to mutant alleles (dots) are shown here with average (thick red

901 bar) and standard deviation (thin red bar). A detection cutoff value was applied so that

902 mutant alleles with high abundances can be detected.

903

904 The following source data is available for Figure 5:

905

**Figure 5 - Source data 1.** Percent reads mapped to artificial CRISPR references.

906

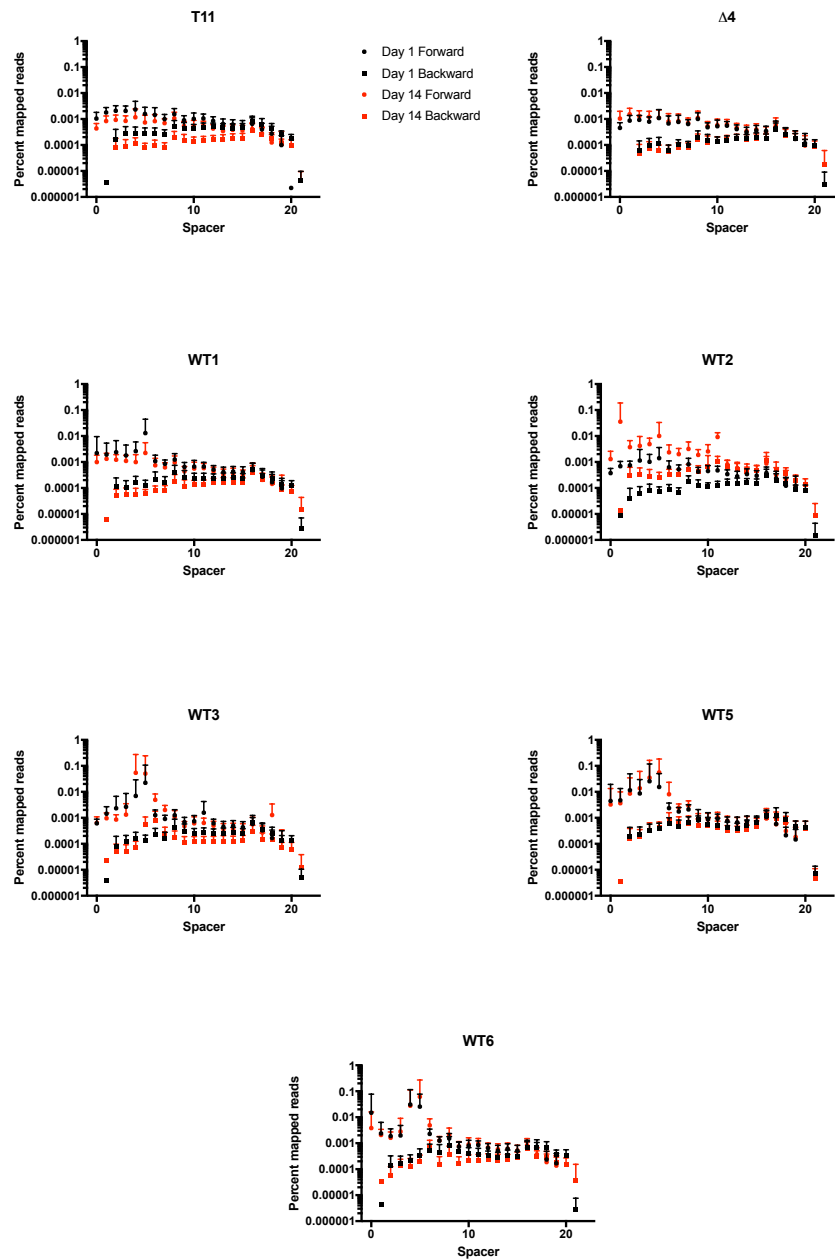

907

908 **Figure 6. Mutant CRISPR alleles arise predominately through forward spacer**

909 **deletion events.** The forward spacer deletion and backward rearrangement rates (y-

910 axis) were calculated for the CRISPR3 amplicon of each passaged population and are

911 plotted against each spacer occurring in the CRISPR3 array shown on the x-axis. For

912 each sample, the forward deletion (dots) and backward rearrangement (squares) rates

913 for Day 1 and Day 14 of the passage are shown in black and red, respectively. a) BHI

914 passaged T11RF parent strain. b) Erythromycin passaged  $\Delta 4$  transconjugant. c-g)

915 Erythromycin passaged WT transconjugants.

916

917 The following source data is available for Figure 6:

918 **Figure 6 - Source data 1.** Percent reads mapped to all possible CRISPR alleles.

919

920

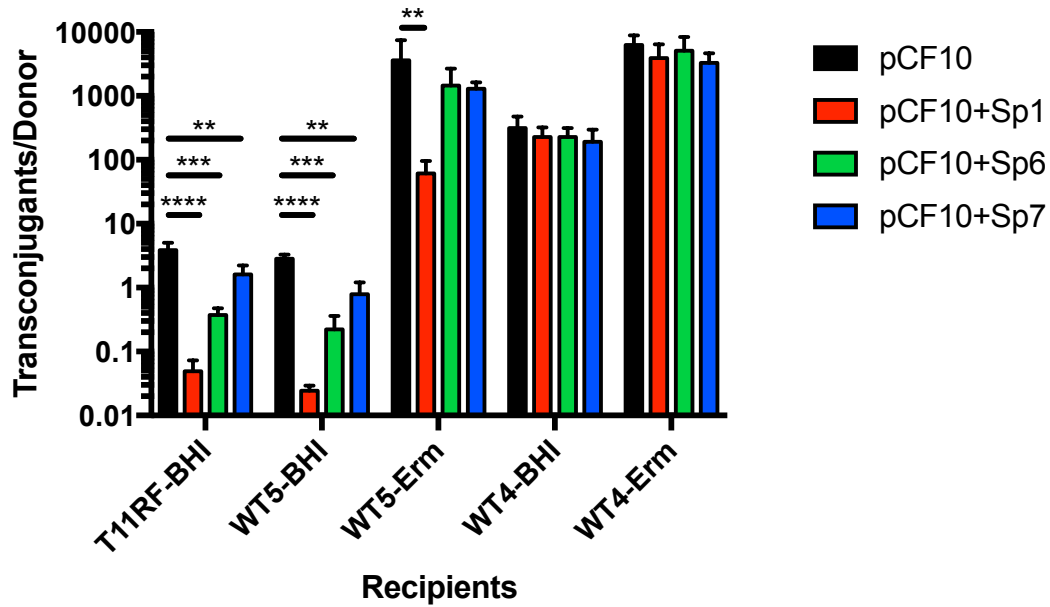

921

922

923 **Figure 7. Compromised CRISPR-Cas primes populations for MGE acquisition.** Day  
924 14 transconjugant populations passaged in BHI and erythromycin were used as  
925 recipients in conjugation with OG1SSp pCF10 and derivatives with protospacers  
926 corresponding to spacers 1, 6 and 7 of the T11RF CRISPR3 array. The Day 14 BHI-  
927 passaged T11RF control population was used as recipient in conjugation, serving as  
928 positive control. The graph shows the conjugation frequency or ratio of transconjugants  
929 to donors from mating reactions. Statistical significance was determined using a  
930 student's t-test; P-values: \*\*  $\leq 0.01$ ; \*\*\*  $\leq 0.001$ ; \*\*\*\*  $\leq 0.0001$ .

930

931 The following source data is available for Figure 7:

932 **Figure 7 - Source data 1.** CFU/mL of transconjugant and donor cell populations from  
933 conjugation reactions.

934

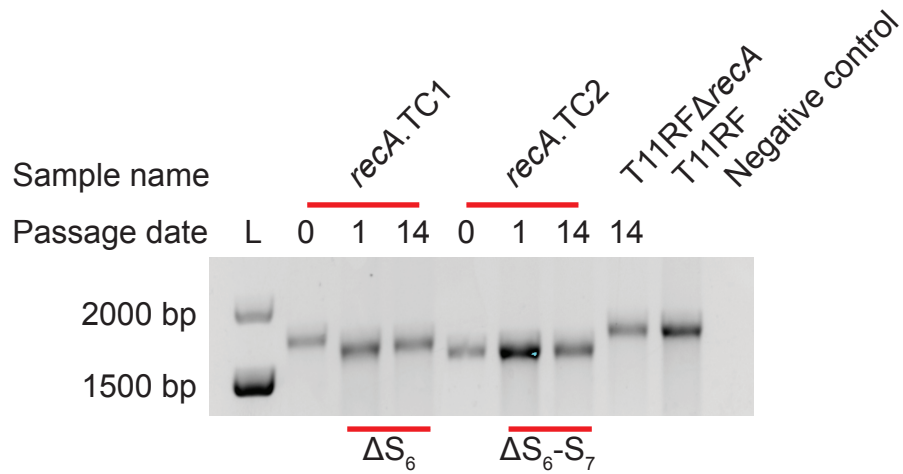

935  
936  
937  
938  
939  
940  
941

**Figure 8. CRISPR3 array reduction is not dependent on RecA.** Two randomly selected transconjugants were passaged *in vitro* with erythromycin selection and the CRISPR3 amplicon sizes were monitored using PCR and gel electrophoresis. As a control, the T11RF $\Delta$ recA parent strain was passaged in BHI and used as a control in PCR analysis. L: DNA Ladder.



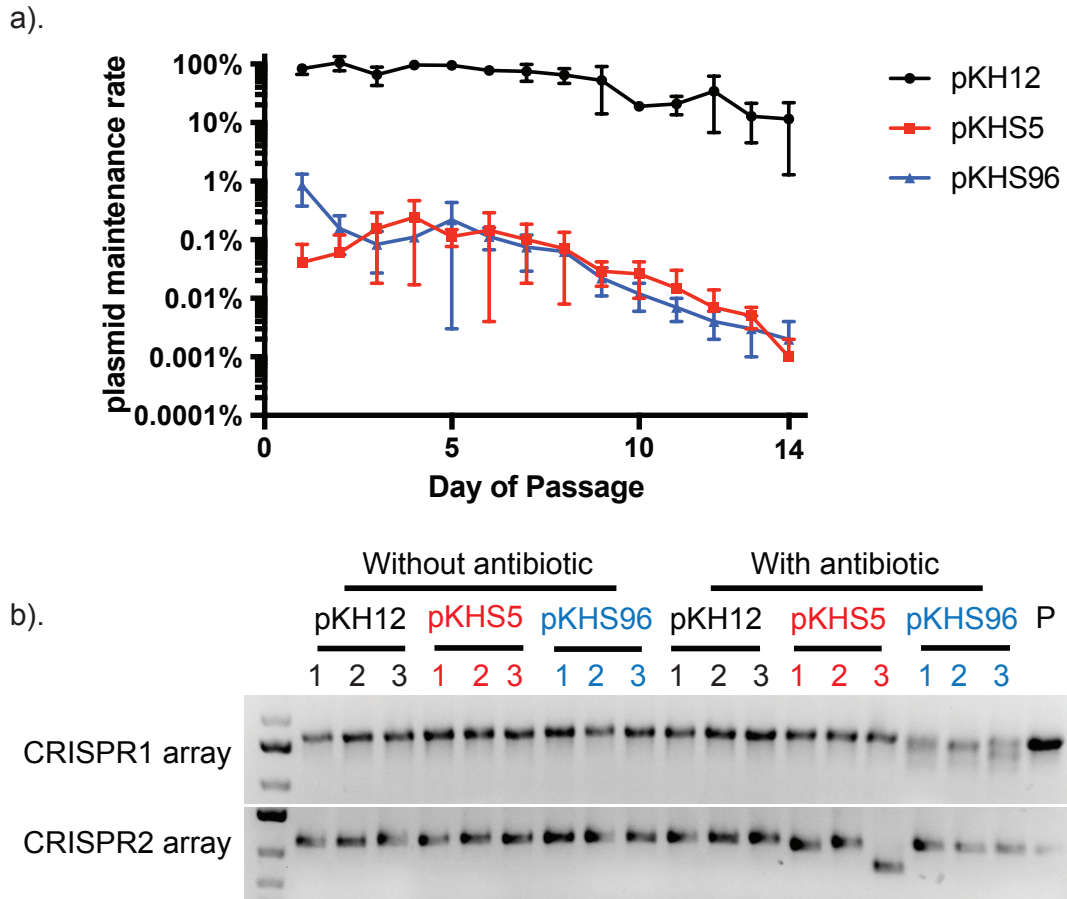

942  
943  
944  
945  
946  
947  
948  
949  
950

**Figure 9. Antibiotic-driven CRISPR compromise is conserved in all type II CRISPR-Cas systems in *E. faecalis*.** a) Plasmid maintenance rates of OG1RF transformants passaged in the absence of chloramphenicol. Each dot represents the average rate from three transformants with the standard deviation. b) CRISPR1 and CRISPR2 amplicon PCR results from Day 14 transformant populations passaged without antibiotic (left) and with antibiotic (right). P: positive control.

951 **Table 1. Bacterial strains and plasmids used.**

| <b>Name</b>                       | <b>Description</b>                                                                                                    | <b>Reference</b> |
|-----------------------------------|-----------------------------------------------------------------------------------------------------------------------|------------------|
| <b><i>E. faecalis</i> strains</b> |                                                                                                                       |                  |
| T11RF                             | Rifampicin- and fusidic acid-resistant derivative of the human urine isolate T11                                      | (4, 37)          |
| T11RF $\Delta$ <i>cas9</i>        | Derivative of T11RF with <i>cas9</i> deleted                                                                          | (37)             |
| T11RF $\Delta$ <i>recA</i>        | Derivative of T11RF with <i>recA</i> deleted                                                                          | This study       |
| OG1RF                             | Rifampicin- and fusidic acid-resistant derivative of the human oral isolate OG1                                       | (29, 59)         |
| OG1SSp                            | Spectinomycin- and streptomycin-resistant derivative of OG1; donor strain for conjugation assays                      | (39, 43, 60)     |
| <b>Plasmids</b>                   |                                                                                                                       |                  |
| pAM714                            | 65 kb PRP encoding erythromycin on Tn917, derivative of pAD1                                                          | (39)             |
| pCF10                             | 67 kb PRP encoding tetracycline resistance on Tn925                                                                   | (43)             |
| pLZ12                             | Broad host range shuttle vector encoding chloramphenicol resistance                                                   | (61)             |
| pKH12                             | pLZ12 with <i>oriT</i>                                                                                                | (45)             |
| pKHS5                             | pKH12 with CRISPR2 protospacer S5 and CRISPR1/2 PAM                                                                   | This study       |
| pKHS96                            | pKH12 with CRISPR1 protospacer S96 and CRISPR1/2 PAM                                                                  | (45)             |
| pWH <i>recA</i>                   | pLT06 with ~750 bp up- and downstream of T11RF <i>recA</i>                                                            |                  |
| pVP107                            | pLT06 with T11CR2 protospacer and CRISPR1/2 PAM                                                                       | (37)             |
| pWH107                            | pVP107 digested with XbaI/SphI and re-ligated with primers pVP107_XbaI_For/pVP107_SphI_Rev to remove PstI enzyme site | This study       |
| pWH107.S1                         | pWH107 with T11CR3 protospacer S1 and CRISPR3 PAM inserted between BamHI/PstI                                         | This study       |
| pWH107.S6                         | pWH107 with T11CR3 protospacer S6 and CRISPR3 PAM inserted between BamHI/PstI                                         | This study       |
| pWH107.S7                         | pWH107 with T11CR3 protospacer S10 and CRISPR3 PAM inserted between BamHI/PstI                                        | This study       |

952

953 **Table 2. CRISPR alleles.**

| Sample name                | Day 1 Sanger <sup>c</sup>                      | Day 14 Sanger <sup>c</sup>                     | Day 1 Amplicon <sup>d</sup>                                                                                                                    | Day 14 Amplicon <sup>d</sup>                                                                                                                   |
|----------------------------|------------------------------------------------|------------------------------------------------|------------------------------------------------------------------------------------------------------------------------------------------------|------------------------------------------------------------------------------------------------------------------------------------------------|
| T11RF control <sup>a</sup> | WT                                             | WT                                             | WT                                                                                                                                             | WT                                                                                                                                             |
| $\Delta 4^b$               | WT                                             | WT                                             | WT                                                                                                                                             | WT                                                                                                                                             |
| WT1 <sup>b</sup>           | Poor quality at S <sub>6</sub> -S <sub>7</sub> | WT                                             | $\Delta S_6$<br>$\Delta S_6$ -S <sub>7</sub>                                                                                                   | WT                                                                                                                                             |
| WT2 <sup>b</sup>           | WT                                             | $\Delta S_2$ -S <sub>11</sub>                  | WT                                                                                                                                             | $\Delta S_2$ -S <sub>11</sub>                                                                                                                  |
| WT3 <sup>b</sup>           | Poor quality at S <sub>6</sub> -S <sub>7</sub> | $\Delta S_5$ -S <sub>7</sub>                   | $\Delta S_6$<br>$\Delta S_5$ -S <sub>7</sub>                                                                                                   | $\Delta S_5$ -S <sub>7</sub><br>$\Delta S_6$                                                                                                   |
| WT5 <sup>b</sup>           | Poor quality at S <sub>3</sub> -S <sub>8</sub> | Poor quality at S <sub>3</sub> -S <sub>9</sub> | $\Delta S_5$ -S <sub>8</sub><br>$\Delta S_3$ -S <sub>16</sub><br>$\Delta S_6$<br>$\Delta S_4$ -S <sub>9</sub><br>$\Delta S_1$ -S <sub>14</sub> | $\Delta S_5$ -S <sub>8</sub><br>$\Delta S_4$ -S <sub>9</sub><br>$\Delta S_6$<br>$\Delta S_6$ -S <sub>18</sub><br>$\Delta S_3$ -S <sub>16</sub> |
| WT6 <sup>b</sup>           | Poor quality at S <sub>1</sub> -S <sub>7</sub> | Poor quality at S <sub>5</sub> -S <sub>6</sub> | $\Delta S_5$ -S <sub>6</sub><br>$\Delta S_1$ -S <sub>17</sub><br>$\Delta S_5$ -S <sub>7</sub><br>$\Delta S_6$<br>$\Delta S_6$ -S <sub>9</sub>  | $\Delta S_6$<br>$\Delta S_5$ -S <sub>6</sub><br>$\Delta S_5$ -S <sub>7</sub><br>$\Delta S_6$ -S <sub>10</sub>                                  |

954 <sup>a</sup>T11RF without pAM714 passaged for 14 days in BHI medium.

955 <sup>b</sup>pAM714 transconjugants passaged for 14 days in BHI medium with erythromycin.

956 <sup>c</sup>CRISPR3 alleles detected by Sanger sequencing.

957 <sup>d</sup>CRISPR3 alleles detected by Illumina amplicon deep sequencing. Mutant alleles with  
958 >0.3% abundance are shown for each population and are listed from highest to lowest  
959 abundance. If no mutant alleles were detected above this threshold, "WT" is stated.

960

961 The following source data is available for Table 2:

962 **Figure 5 - Source data 1.** Percent reads mapped to artificial CRISPR references.

963

964 **Table 3. Nonsynonymous cas9 mutations detected by whole genome sequencing.**

| Position | Ref | Allele | Amino acid change | WT1 <sup>a</sup> | WT2 <sup>a</sup> | WT3 <sup>a</sup> |
|----------|-----|--------|-------------------|------------------|------------------|------------------|
| 652983   | G   | A      | Gln506*           | 31.6% (689x)     | ND (590x)        | ND (577x)        |
| 653184   | C   | T      | Glu439Lys         | ND (640x)        | ND (536x)        | 24.2% (594x)     |
| 653180   | AG  | T      | Leu440fs          | ND (640x)        | ND (528x)        | 23.5% (590x)     |
| 654165   | G   | -      | Arg112fs          | ND (676x)        | 48.4% (659x)     | ND (772x)        |

965 <sup>a</sup>Shown are variation frequency and coverage at the indicated nucleotide position on *E.*  
966 *faecalis* T11 contig 1.11.

967 ND, not detected.

968

969 The following figure supplements and source data are available for Table 3:

970 **Table supplement 2.** SNPs detection in all gDNA sequencing samples.

971 Source data has been deposited in the sequencing reads archive under **BioProject ID:**

972 **PRJNA418345.**

973

974

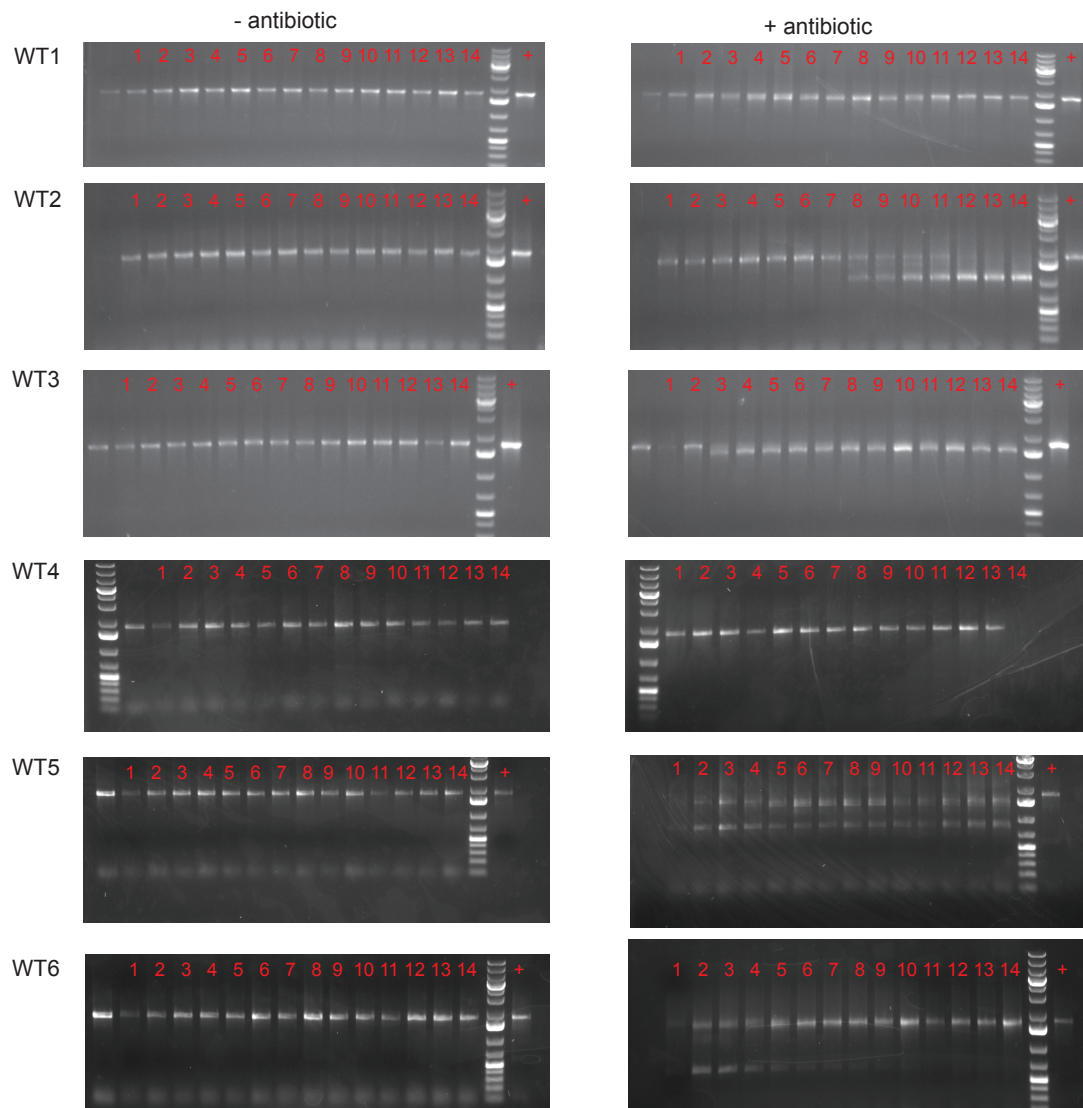

975

976

977 **Figure supplement 1. Gel electrophoresis of CRISPR3 amplicons in T11RF**

978 **pAM714 transconjugants over 14 days passaged with and without antibiotic. Six**

979 **T11RF pAM714 transconjugants were serially passaged for 14 days in BHI (left panel) or**

980 **BHI with erythromycin (right panel). The size of the CRISPR3 array was monitored using**

981 **PCR and gel electrophoresis on each passage day.**

982

983 **Table supplement 1. Primers used in this study.**

---

| <b>Name</b>                   | <b>Primer sequence</b>                              |
|-------------------------------|-----------------------------------------------------|
| <b>CRISPR seq primers</b>     |                                                     |
| CRISPR1 seq For               | CGTATTTGACAGAGGATGAAG                               |
| CRISPR1 seq Rev               | CGAATATGCCTGTGGTGAAA                                |
| CRISPR2 seq For               | TGCTGTTACAGCTACTAAA                                 |
| CRISPR2 seq Rev               | GCCAATGTTACAATATCAAACA                              |
| CRISPR3 seq For               | GCTCACTGTATTGGAAGAAC                                |
| CRISPR3 seq Rev               | CATCGATTCAATTATTCCTCCAA                             |
| <b>pWH107 and derivatives</b> |                                                     |
| pVP107_XbaI_For               | CTAGAGATAATATATCTTTTATATAGAAGATGGGTACCAT<br>GGCATG  |
| pVP107_SphI_Rev               | CCATGGTACCCATCTTCTATATAAAAAGATATATTATCT             |
| T11CR3sp6_BamPst_F            | GATCCTCCCGATACAGCTCTTTATTCTTCTAATTACATTG<br>TACTGCA |
| T11CR3sp6_BamPst_R            | GTACAATGTAATTAGAAGAATAAAGAGCTGTATCGGGAG             |
| T11CR3sp1_BamPst_F            | GATCCTCAAAGTTGAATATGTTTCGCTTTGGTGTAAATTG<br>TACTGCA |
| T11CR3sp1_BamPst_R            | GTACAATTACACCAAAGCGAAACATATTCAACTTTTGAG             |
| T11CR3sp7_BamPst_F            | GATCCTCTGCTTTTGGAGGAATACAAATGAGAAGATTTTG<br>TACTGCA |
| T11CR3sp7_BamPst_R            | GTACAAAATCTTCTCATTGTATTCTCCAAAAGCAGAG               |
| T11CR2S1 seq arm1 F           | CGAAATCAGCACATGGAACA                                |
| T11CR2S1 seq arm2 R           | CCAGTAACTGTATCAACTAC                                |

---

984

985 **Table supplement 2. SNPs detection in all gDNA sequencing samples.**

| Contig | Position | Ref | Allele | Annotation                                                 | Amino acid change              | T11RF <sup>a</sup> | WT3 <sup>b</sup> | WT1 <sup>c</sup> | WT2 <sup>c</sup> | WT3 <sup>c</sup> | WT5 <sup>c</sup> | WT6 <sup>c</sup> | Δ4 <sup>c</sup> |
|--------|----------|-----|--------|------------------------------------------------------------|--------------------------------|--------------------|------------------|------------------|------------------|------------------|------------------|------------------|-----------------|
| AD1REP |          |     |        |                                                            | AAB00504.1:                    |                    |                  |                  |                  |                  |                  |                  |                 |
| ABC    | 1904     | C   | T      | Replication protein                                        | p.Pro100Leu                    |                    |                  |                  | 45.49            |                  |                  |                  |                 |
| 1.11   | 51613    | C   | T      | Collagen adhesin                                           |                                |                    |                  |                  |                  |                  |                  | 25.00            |                 |
| 1.11   | 51674    | G   | A      | Collagen adhesin                                           | WP_002379313.1:<br>p.Gly392Ser |                    |                  |                  |                  |                  | 33.90            | 33.39            |                 |
| 1.11   | 51745    | A   | G      | Collagen adhesin                                           |                                |                    |                  |                  |                  |                  | 33.02            |                  |                 |
| 1.11   | 337315   | G   | T      | Helicase                                                   | WP_002382285.1:<br>p.Glu425*   |                    |                  |                  |                  |                  |                  |                  | 37.16           |
| 1.11   | 652983   | G   | A      | Cas9                                                       | WP_002379510.1:<br>p.Gln506*   |                    |                  | 31.64            |                  |                  |                  |                  |                 |
| 1.11   | 653180   | AG  | T      | Cas9                                                       | WP_002379510.1:<br>p.Leu440fs  |                    | 22.74            |                  |                  | 23.52            |                  |                  |                 |
| 1.11   | 653184   | C   | T      | Cas9                                                       | WP_002379510.1:<br>p.Glu439Lys |                    | 23.21            |                  |                  | 24.17            |                  |                  |                 |
| 1.11   | 654165   | G   | -      | Cas9<br>Conserved                                          | WP_002379510.1:<br>p.Arg112fs  |                    |                  |                  | 48.41            |                  |                  |                  |                 |
| 1.11   | 685523   | A   | T      | hypothetical protein<br>Conserved                          | WP_002382413.1:<br>p.Glu5Val   |                    | 23.24            |                  |                  |                  |                  |                  |                 |
| 1.11   | 685938   | A   | T      | hypothetical protein<br>Cell wall surface<br>anchor family | WP_002382413.1:<br>p.Glu143Asp |                    | 26.00            |                  |                  |                  |                  |                  |                 |
| 1.11   | 974866   | AT  | GC     | Cell wall surface<br>anchor family<br>protein              | WP_002379620.1:<br>p.Ile972Ala |                    |                  |                  |                  |                  |                  | 23.41            |                 |
| 1.11   | 974991   | A   | G      | Cell wall surface<br>anchor family<br>protein              |                                |                    |                  |                  |                  |                  |                  |                  | 22.67           |
| 1.2    | 2903     | C   | T      | Peptidylprolyl<br>isomerase                                | WP_002355150.1:<br>p.Val167Ile |                    |                  |                  | 46.03            |                  |                  |                  |                 |

986 <sup>a</sup>Day 14 BHI-passaged

987 <sup>b</sup>Day 1 Erythromycin-passaged population WT3 to confirm presence of cas9 mutations prior to Day 14

988 <sup>c</sup>Day 14 Erythromycin-passaged

989

990 Source data for Table supplement 2 has been deposited in the sequencing reads archive under **BioProject ID:**  
991 **PRJNA418345.**

992

993 **Table supplement 3. Quality control of the amplicon sequencing reads.**

| <b>Sample name</b> | <b># of Total reads</b> | <b>Total mapped reads</b> | <b># mapped to WT references</b> | <b># mapped to mutant references</b> | <b>% reads mapped in Step 1</b> | <b>% reads mapped in Step 2</b> | <b>% reads mapped in Step 3</b> | <b>% reads mapped in Step 4</b> | <b>% reads left</b> |
|--------------------|-------------------------|---------------------------|----------------------------------|--------------------------------------|---------------------------------|---------------------------------|---------------------------------|---------------------------------|---------------------|
| <b>Day 1</b>       |                         |                           |                                  |                                      |                                 |                                 |                                 |                                 |                     |
| T11RF              | 19,082,652              | 7398495                   | 7273291                          | 125204                               | 97.543%                         | 0.642%                          | 0.543%                          | 0.865%                          | 0.408%              |
| Δ4                 | 20,808,404              | 9073461                   | 8995910                          | 77551                                | 98.155%                         | 0.362%                          | 0.616%                          | 0.702%                          | 0.165%              |
| WT1                | 16,736,162              | 6976811                   | 6808760                          | 168051                               | 97.629%                         | 0.985%                          | 0.544%                          | 0.709%                          | 0.132%              |
| WT2                | 16,859,152              | 7281948                   | 7222339                          | 59609                                | 98.292%                         | 0.344%                          | 0.562%                          | 0.664%                          | 0.139%              |
| WT3                | 17,357,970              | 7387447                   | 7136664                          | 250783                               | 97.141%                         | 1.416%                          | 0.626%                          | 0.672%                          | 0.145%              |
| WT5                | 17,744,230              | 7215381                   | 6784881                          | 430500                               | 96.024%                         | 2.393%                          | 0.699%                          | 0.747%                          | 0.137%              |
| WT6                | 16,179,400              | 6744053                   | 6337706                          | 406347                               | 95.871%                         | 2.488%                          | 0.814%                          | 0.672%                          | 0.154%              |
| <b>Day 14</b>      |                         |                           |                                  |                                      |                                 |                                 |                                 |                                 |                     |
| T11RF              | 17,973,946              | 7829494                   | 7760594                          | 68900                                | 98.233%                         | 0.373%                          | 0.601%                          | 0.649%                          | 0.143%              |
| Δ4                 | 14,403,868              | 5424100                   | 5369063                          | 55037                                | 98.173%                         | 0.445%                          | 0.625%                          | 0.529%                          | 0.227%              |
| WT1                | 14,158,158              | 5275288                   | 5219558                          | 55730                                | 98.136%                         | 0.454%                          | 0.624%                          | 0.545%                          | 0.240%              |
| WT2                | 14,538,836              | 4744257                   | 4489642                          | 254615                               | 96.340%                         | 2.166%                          | 0.707%                          | 0.527%                          | 0.260%              |
| WT3                | 17,174,946              | 6039118                   | 5653212                          | 385906                               | 96.018%                         | 2.538%                          | 0.738%                          | 0.514%                          | 0.192%              |
| WT5                | 15,200,646              | 5844417                   | 5384356                          | 460061                               | 95.193%                         | 2.998%                          | 0.885%                          | 0.738%                          | 0.187%              |
| WT6                | 12,325,042              | 4505777                   | 4201804                          | 303973                               | 94.419%                         | 2.735%                          | 1.501%                          | 1.005%                          | 0.340%              |

994

995 Source data for Table supplement 3 has been deposited in the sequencing reads archive under **BioProject ID:**  
 996 **PRJNA418345.**
