1                   Deep sequencing analysis of CRISPR-escaping plasmid transconjugants in

2                                           *Enterococcus faecalis*

3

4

5           Wenwen Huo<sup>ab</sup>, Valerie J. Price<sup>ab</sup>, Ardalan Sharifi<sup>a</sup>, Michael Q. Zhang<sup>a</sup>, and Kelli L. Palmer<sup>a\*</sup>

6

7   Department of Biological Sciences, The University of Texas at Dallas, Richardson, Texas, USA<sup>a</sup>

8   <sup>b</sup>These authors contributed equally

9   \*Corresponding author

10   E-mail: [kelli.palmer@utdallas.edu](mailto:kelli.palmer@utdallas.edu) (KLP)

## 11 **Abstract**

12 *Enterococcus faecalis* is a Gram-positive bacterium that natively colonizes the human  
13 gastrointestinal tract and opportunistically causes life-threatening infections. Multidrug-resistant  
14 (MDR) *E. faecalis* strains have emerged that are replete with mobile genetic elements (MGEs).  
15 Some *E. faecalis* strains possess CRISPR-Cas systems, which reduce the conjugation  
16 frequency of pheromone-responsive plasmids. However, many transconjugants still arise, and  
17 we have demonstrated in previous studies that *E. faecalis* can transiently maintain both a  
18 functional CRISPR-Cas system and a CRISPR-Cas target. In this study, we used serial  
19 passage and deep sequencing to analyze CRISPR array dynamics over time in transconjugants  
20 which possess both a functional CRISPR-Cas system and a CRISPR-Cas target. In the  
21 presence of antibiotic selection for the plasmid, we found that plasmids ultimately escape  
22 CRISPR defense via the emergence of compromised CRISPR-Cas defense in host populations.  
23 As a consequence, these populations have enhanced abilities to acquire a second antibiotic  
24 resistance plasmid. In the absence of antibiotic selection, plasmids are lost from wild-type but  
25 not  $\Delta cas9$  host populations over time. We conclude that the adaptive immune system of *E.*  
26 *faecalis* becomes compromised under antibiotic selection for MGEs, generating populations with  
27 enhanced abilities to undergo horizontal gene transfer.

28

## 29 **Importance**

30 *Enterococcus faecalis* is a leading cause of hospital-acquired infections and known  
31 disseminator of drug resistance among Gram-positive bacteria. One of the main means of  
32 antibiotic resistance dissemination among *E. faecalis* populations is mediated by plasmids. We  
33 have previously shown that strains with an active CRISPR-Cas system can reduce plasmid  
34 acquisition and thus limit the transmission of antibiotic resistance determinants. In this study, we  
35 observed subpopulations with transient co-existence of active CRISPR-Cas and a plasmid  
36 target. Through serial passage and targeted sequencing analysis on these populations, we

37 demonstrate that antibiotic treatment plays a key role in shaping the *E. faecalis* genome,  
38 resulting in compromised genome defense that facilitates acquisition of other resistance  
39 plasmids. These results are significant because they show how antibiotic selection for a plasmid  
40 can alter the evolutionary trajectory of *E. faecalis* populations rendering them vulnerable to the  
41 acceptance of multiple resistance plasmids.  
42

## 43 **Introduction**

44 *Enterococcus faecalis* is a Gram-positive bacterium that normally colonizes the gastrointestinal  
45 tracts of humans and other animals (1). *E. faecalis* is also an opportunistic pathogen that can  
46 cause life-threatening antibiotic-resistant infections in hospitalized patients (2-4). Some *E.*  
47 *faecalis* strains have acquired antibiotic resistance through horizontal gene transfer (HGT),  
48 mediated primarily by plasmids and integrative conjugative elements (5-7). One of the most  
49 clinically relevant forms of HGT in *E. faecalis* is afforded through the pheromone-responsive  
50 plasmids (PRPs). The PRPs are narrow host range conjugative plasmids that disseminate  
51 antibiotic resistance and virulence genes among *E. faecalis* populations (5, 8-10). PRPs can  
52 also mobilize resistance genes to other clinically relevant bacterial pathogens (2, 11-14).

53

54 CRISPR-Cas systems provide prokaryotes with heritable sequence-specific genome defense  
55 against mobile genetic elements (MGEs) including plasmids and phage (15, 16). The structure  
56 and classification of these systems was reviewed recently (17). CRISPR-Cas systems consist of  
57 *cas* genes and a CRISPR array composed of spacers interspersed by direct and partially  
58 palindromic repeats (18, 19). Where sequence matches can be identified, the spacers generally  
59 have identity to MGEs of phage or plasmid origin (20). Some *E. faecalis* strains encode Type II  
60 CRISPR-Cas systems (21, 22) characterized by the Cas9 endonuclease, which cleaves DNA  
61 targets in a sequence-specific manner (23-25). Type II CRISPR-Cas defense is afforded in  
62 three stages. During adaptation, a Cas-protein complex, including Cas9, recognizes a  
63 protospacer from a newly encountered MGE in a PAM (Protospacer Adjacent Motif)-dependent  
64 manner, after which the protospacer is incorporated into the leader end of the CRISPR array  
65 (26-28). During expression, the CRISPR array is transcribed into pre-crRNA that is then then  
66 processed by the endonuclease RNase III in concert with Cas9 and tracrRNA (trans-activating  
67 crRNA), generating mature crRNAs (29). A mature crRNA bound by Cas9 and tracrRNA is an  
68 active targeting complex. When the bacterial host is invaded by a MGE that has



69 complementarity to a crRNA, the targeting complex recognizes the MGE in a PAM-dependent  
70 manner and creates a double-stranded DNA break to prevent MGE invasion (30, 31).

71  
72 We reported in a previous study that Type II CRISPR-Cas systems with spacers targeting PRPs  
73 can reduce PRP dissemination in *E. faecalis* colony biofilms by ~80-fold (32). However, PRP  
74 transconjugants were still observed at high densities ( $\sim 10^5$  cfu/mL) in these mating experiments.  
75 In contrast, in several other bacterial species, no or few transconjugants were observed when  
76 CRISPR-Cas defense in recipient cells targeted the conjugative element (16, 33-35). Some of  
77 these studies sequenced the CRISPR-Cas loci of the CRISPR-escaping transconjugants,  
78 determining that the transconjugants possessed mutations that compromised or inactivated  
79 CRISPR-Cas defense (33, 34). Deletions of CRISPR spacers were commonly observed, as well  
80 as mutations in *cas* genes (34, 36). These studies concluded that conjugation occurred into  
81 recipient cells that had pre-existing mutations in CRISPR-Cas (33, 34). Similar observations  
82 have been made for CRISPR-escape mutants obtained in plasmid transformation experiments  
83 (37, 38). Collectively, these studies are consistent with the inability of cells to concomitantly  
84 maintain both a functional CRISPR-Cas system and a target of the CRISPR-Cas system.  
85 However, in recent studies from our lab using engineered shuttle plasmids mobilized by a PRP,  
86 we determined that multidrug-resistant *E. faecalis* can transiently tolerate both CRISPR systems  
87 and their plasmid targets, albeit at a fitness cost (reduced growth rate), and that selection can  
88 determine the outcome of these conflicts (39). Specifically, CRISPR spacer deletion mutants  
89 emerged over time when antibiotic selection for the plasmid was present, and plasmids were  
90 lost when selection was absent (39). Similar observations of transient tolerance of  
91 CRISPR/target co-maintenance have been made in *Pseudomonas aeruginosa* and *Listeria*  
92 *monocytogenes* (40, 41).

93

94 In the present study, we further investigated how antibiotic selection impacts CRISPR-Cas  
95 systems and their targets in *E. faecalis*, specifically investigating PRP transconjugants using  
96 serial passage and deep sequencing experiments. Overall, our data provide evidence that  
97 antibiotic-selected PRP maintenance in *E. faecalis* can lead to compromised CRISPR-Cas  
98 defense and enhanced abilities to acquire other MGEs.

99

## 100 **Results**

101 **Design of serial passage experiments.** *E. faecalis* T11RF possesses a Type II CRISPR-Cas  
102 system, CRISPR3-Cas, that has 21 unique spacers (Fig S1) (32). Spacer 6 has 100% sequence  
103 identity to the *repB* gene of the model PRP pAD1 (42, 43), a well-characterized PRP that  
104 encodes a haemolytic bacteriocin, cytolysin; the virulence factor aggregation substance; and the  
105 toxin-antitoxin system *par* (8, 44). Previous research from our lab demonstrated that CRISPR3-  
106 Cas of T11RF significantly reduces the conjugation frequency of pAM714, a derivative of pAD1  
107 conferring erythromycin resistance via *ermB* on Tn917 (32). However, despite the activity of  
108 CRISPR3-Cas, a large number ( $\sim 10^5$ ) of presumptive T11RF(pAM714) transconjugants were  
109 obtained from these conjugation reactions. We set out to analyze these transconjugants further.

110

111 Conjugation reactions between *E. faecalis* OG1SSp(pAM714) donors and T11RF recipients  
112 were performed for 18 hours on agar plates without erythromycin selection as previously  
113 described (32). Biofilms were then scraped from the plates, resuspended and diluted, and  
114 plated on agar selective for donors, recipients, and transconjugants. Conjugation frequencies  
115 from these assays were previously reported (32). Colonies arising on transconjugant selection  
116 agar were used for this study (Fig 1a). We randomly selected transconjugant colonies from two  
117 mating schemes, T11RF(pAM714) and T11RF $\Delta$ cas9(pAM714); the  $\Delta$ cas9 strain possesses no  
118 CRISPR3-Cas activity through an in-frame deletion of the *cas9* coding region (32). We  
119 performed serial passage on a total of six T11RF(pAM714) transconjugants (referred to as

120 WT1-WT6) and six T11RF $\Delta$ cas9(pAM714) transconjugants (referred to as  $\Delta$ 1- $\Delta$ 6) that were  
121 derived from two independent conjugation experiments. The transconjugant colonies were each  
122 resuspended in brain heart infusion (BHI) broth, and the percentage of erythromycin-resistant  
123 cells and the size and Sanger sequence of the CRISPR3 amplicon was determined for each  
124 (Fig S2; these data are discussed below). These data are referred to as "Day 0." Next, the  
125 colony resuspensions were split equally into BHI medium and BHI medium with erythromycin.  
126 These populations were then passaged daily over a period of 14 days. Every 24 h during the  
127 course of the passage, the percentage of erythromycin-resistant cells relative to the total viable  
128 population and the size and Sanger sequence of the CRISPR3 amplicon were determined.

129

130 At Day 0, erythromycin resistance was detected in both the T11RF(pAM714) and  
131 T11RF $\Delta$ cas9(pAM714) transconjugant populations, with the T11RF(pAM714) colonies having  
132 overall less erythromycin-resistant cells, indicative of active CRISPR defense (Fig S2a). The  
133 CRISPR3 arrays of all transconjugants analyzed were of wild-type size based on PCR (Fig S2b)  
134 and Sanger sequencing analysis.

135

136 **Erythromycin resistance is eliminated by WT but not  $\Delta$ cas9 transconjugants during**  
137 **passage in non-selective medium.** For serial passages in the absence of erythromycin, a  
138 gradual decrease in the frequency of erythromycin-resistant cells was observed for five of the  
139 six WT transconjugants (Fig 1b). In contrast, erythromycin resistance was stably maintained at  
140 high frequencies in all of the T11RF $\Delta$ cas9(pAM714) transconjugant populations (Fig 1b).  
141 CRISPR3 array size remained wild-type over the course of serial passage for both  
142 T11RF(pAM714) and T11RF $\Delta$ cas9(pAM714) transconjugant populations (Fig 1d and Fig S3).

143

144 The WT4 population did not exhibit erythromycin resistance loss in the absence of antibiotic  
145 selection. We Sanger-sequenced the *cas9* coding region of the WT4 population at Day 0 and

146 after 1 day of passage in the presence of erythromycin and identified a mutation resulting in an  
147 Ala749Thr substitution. Ala749 occurs within the RuvC nuclease domain in T11RF Cas9 and is  
148 conserved in the model *Streptococcus pyogenes* Cas9 (32). Due to the critical catalytic function  
149 of the RuvC domain, we hypothesize that the Ala749Thr substitution confers a loss of Cas9  
150 function. We tested the ability of the BHI- and erythromycin-passaged WT4 populations to  
151 interfere with plasmid transfer using derivatives of the PRP, pCF10 (45), that are targeted by  
152 CRISPR3 spacers 1, 6, and 7. These experiments revealed that the Ala749 mutation indeed  
153 renders these populations deficient for CRISPR-Cas activity (Fig 2).

154

155 **Under continuous antibiotic selection, CRISPR-Cas mutants emerge over time in WT**  
156 **transconjugant populations.** When the transconjugant populations were serially passaged in  
157 the presence of erythromycin, we observed stable maintenance of erythromycin resistance in  
158 both WT and  $\Delta cas9$  transconjugants (Fig 1c). We amplified the CRISPR3 region of  
159 erythromycin-passaged transconjugants and observed significant heterogeneity in the CRISPR3  
160 array for WT transconjugant populations. By Day 14, four of the six T11RF(pAM714)  
161 transconjugant lineages had visibly reduced CRISPR3 arrays (Fig 1d). The variation in array  
162 size initiated sporadically over the 14 days and each transconjugant had a unique pattern (SFig  
163 3). Sanger sequencing of the CRISPR3 array from Day 1 and Day 14 erythromycin-passaged  
164 populations revealed that S<sub>6</sub> was either deleted from the array or had low sequencing quality  
165 (Table 2). In contrast to WT populations, CRISPR3 arrays for the T11RF $\Delta cas9$ (pAM714)  
166 transconjugants were unchanged (Fig 1d and Table 2). We chose the  $\Delta 4$  population as a  
167 representative of the T11RF $\Delta cas9$ (pAM714) transconjugant populations for future analyses.

168

169 To investigate the possibility of mutations within *cas* genes, we performed whole genome  
170 Illumina sequencing on five Day 14 erythromycin-passaged T11RF(pAM714) transconjugant  
171 populations and a control population,  $\Delta 4$ . We observed variation in the *cas9* sequence of the

172 WT1, WT2, and WT3 populations (Table 3). All of the mutations led to nonsynonymous changes  
173 and are predicted to result in a loss of function in Cas9 (Table 3). In addition to *cas9* mutations,  
174 some of the populations possessed variation in one or more genes, none of which are predicted  
175 to have an impact on the phenotypes observed in our study (STable2). No mutations were  
176 identified in the S<sub>6</sub> protospacer or PAM region of the *repB* gene in pAM714. However, we did  
177 identify a mutation within *repB*, not associated with the protospacer or PAM, in the WT2  
178 population (STable2). The sequencing also allowed us to investigate the possibility of Tn917  
179 transposition into the T11RF chromosome. We observed no evidence of Tn917 hopping into the  
180 T11 chromosome as all reads overlapping the ends of Tn917 also overlapped the pAD1  
181 reference sequence.

182

183 **Reduced tolerance of S<sub>6</sub> in T11RF(pAM714) transconjugant populations.** To attain greater  
184 resolution of CRISPR3 alleles present in our transconjugant populations, we used Illumina  
185 sequencing to sequence CRISPR3 amplicons from populations of interest. Using this method,  
186 we attained an average of 16 million reads for our amplicons (STable3). We first mapped  
187 CRISPR3 amplicon reads to the T11 reference sequence and calculated coverage depth to  
188 analyze mapping efficiency for BHI-passaged T11RF (lacking pAM714) (Fig. 3a) and the Δ4  
189 transconjugant population passaged in erythromycin (Fig. 3b) as controls. We then expanded  
190 this analysis to the T11RF(pAM714) transconjugants. As expected, depletion of S<sub>6</sub> was detected  
191 in WT2, WT3, WT5, and WT6 populations after 14 days of passage with antibiotic selection (Fig  
192 3d-g). For WT3, WT5, and WT6 populations, S<sub>6</sub> depletion was evident after one day of passage  
193 with selection (Fig 3e-g). For WT1, depletion of S<sub>6</sub> was not detected after 14 days passage with  
194 selection (Fig 3c), consistent with our Sanger sequencing results (Table 2).

195

196 To identify specific mutant CRISPR3 alleles in the amplicon sequencing, we manually  
197 constructed artificial CRISPR3 reference sequences for every possible spacer deletion event

198 (see Materials and Methods for more information). Each artificial reference is 96 bp in length  
199 and contains two spacers connected by a T11 CRISPR3-Cas direct repeat: 5'-spacer[x]-repeat-  
200 spacer[y]-3' (5'-S<sub>x</sub>RS<sub>y</sub>-3'), where spacer[x] and spacer[y] could be 30 bp upstream of the first  
201 repeat (leader end; or S<sub>0</sub> hereafter; see Fig S1a), or any internal spacer within the CRISPR3  
202 array (from spacer 1 to spacer 21; or S<sub>1</sub> to S<sub>21</sub>; Fig S1a). The terminal repeat following S<sub>21</sub> in the  
203 CRISPR3 array is divergent from the direct repeat sequence, so references containing 5'-  
204 spacer[x]-TerminalRepeat-S<sub>T</sub>-3' (5'-S<sub>x</sub>TRS<sub>T</sub>-3') were constructed, where spacer[x] ranges from  
205 S<sub>0</sub> to S<sub>21</sub> and spacer S<sub>T</sub> represents the sequence 30 bp downstream of the terminal repeat (Fig  
206 S1a). In total, 484 references were constructed. Wild-type CRISPR3 alleles were represented  
207 by the reference sequences where 5'-S<sub>x</sub>RS<sub>(x+1)</sub>-3' (0 ≤ x < 21) and 5'-S<sub>21</sub>TRS<sub>T</sub>-3' and mutant  
208 alleles were represented by 5'-S<sub>x</sub>RS<sub>y</sub>-3' (y ≠ x+1). For the control population, which was BHI-  
209 passaged T11RF lacking pAM714, all but 28 (Day 1) and 4 (Day 14) of the 484 possible alleles  
210 were represented in our amplicon reads. We resolved the most abundant mutant CRISPR3  
211 alleles in transconjugant populations by mapping amplicon reads to wild-type and mutant  
212 CRISPR3 references (Fig 4). Of the five T11RF transconjugant populations analyzed, all other  
213 than WT1 possessed at least one mutant CRISPR3 allele after 14 days of passage with  
214 antibiotic selection, and each of those alleles lacked S<sub>6</sub> (Table 2).

215

216 We tested the ability of the Day 14 WT5 population to prevent the acquisition of pCF10 and  
217 pCF10 derivatives that are targeted by CRISPR3 spacers 1, 6 and 7. Based on deep  
218 sequencing data (Table 2), we expected that the WT5 population would interfere with transfer of  
219 pCF10 bearing spacer 1, but not pCF10 bearing spacers 6 or 7. Compared to the BHI-passaged  
220 WT5 population that significantly reduced the acquisition of each of the pCF10 derivatives, the  
221 erythromycin-passaged WT5 population was unable to interfere with pCF10 bearing targets of  
222 spacers 6 and 7 (Fig 2).

223

224 **Preference for spacer deletion over spacer inversion events.** Spacer deletion events due to  
225 plasmid-CRISPR conflict have been previously reported (33, 37). However, the occurrence of  
226 spacer inversions, where a leader distal spacer becomes more leader proximal, have not been  
227 extensively studied. Due to the high sequence depth achieved in our study, we were able to  
228 observe both events and monitor their dynamics for the duration of the serial passaging  
229 experiments. Among our 484 artificial references, the spacer deletion group is represented by  
230 the mutant alleles where a spacer has been removed from its natural position (5'-S<sub>x</sub>RS<sub>y</sub>-3'  
231 where  $y > x+1$  and 5'-S<sub>x</sub>TRS<sub>T</sub>-3' where  $x < 21$ ), while the spacer inversion group is represented  
232 by the mutant alleles where a terminal spacer has become more leader-proximal (5'-S<sub>x</sub>RS<sub>y</sub>-3'  
233 where  $y < x$ ). We calculated spacer deletion and spacer inversion rates for each spacer as  
234 described in Materials and Methods.

235  
236 In Day 1 and Day 14 BHI-passaged T11RF amplicons, we observed slightly higher spacer  
237 deletion rates than spacer inversion rates for leader end spacers, suggesting that spacers at the  
238 leader end are more readily deleted than inverted in naturally occurring CRISPR3 arrays (Fig  
239 5a). On average, Day 14 T11RF showed slightly lower rates for deletion and inversion events  
240 than Day 1 T11RF. However, the deletion and inversion rates were similar at spacers S<sub>9</sub>-S<sub>15</sub> for  
241 Day 1 and Day 14 T11RF populations, indicating an equal chance of spacer deletion and  
242 inversion (Fig 5a). Terminal end spacers are associated with decreased deletion and inversion  
243 rates compared to leader end spacers. Interestingly, the inversion rates of terminal end spacers  
244 are slightly higher than the rates for leader end spacers. We hypothesize that the increased  
245 spacer inversion rates for terminal spacers is due to a greater number of homologous  
246 sequences (direct repeats) toward the leader end of the array, suggesting that homologous  
247 recombination played a role in spacer inversion events.

248



249 The deletion and inversion rates of five T11RF(pAM714) transconjugants and the  $\Delta 4$  population  
250 from Day 1 and Day 14 erythromycin passages were evaluated in the same manner as the  
251 T11RF population. The distribution of deletion and inversion rates in the  $\Delta 4$  and WT1  
252 populations (Fig 5b and c) were similar to T11RF (Fig 5a). We did observe an elevated deletion  
253 rate at S<sub>5</sub> for WT1 at Day 1, consistent with deep sequencing results which detected alleles  
254 containing S<sub>6</sub> deletions in this population. The spacer deletion events in the other  
255 T11RF(pAM714) erythromycin-passaged transconjugants (WT2, WT3, WT5 and WT6) have  
256 unique positional preferences based on an increase in the average number of reads mapped to  
257 the mutant allele references (Fig 5 d-g; red or black dots). Elevated spacer deletion rates were  
258 frequently observed for spacers upstream of S<sub>6</sub>, indicating a selective advantage for spacer  
259 deletion events occurring upstream of S<sub>6</sub>. Finally, we did not observe significant fluctuation of  
260 spacer inversion rates in erythromycin-passaged transconjugants (Fig 5 d-g), indicating that  
261 spacers are more readily deleted than rearranged.

262

263 **Spacer deletion is not exclusively RecA-dependent.** Under antibiotic selection,  
264 T11RF(pAM714) transconjugants lost S<sub>6</sub> to resolve the conflict between CRISPR-Cas and its  
265 target. The loss of S<sub>6</sub> was often coupled with the loss of surrounding spacers, ranging from S<sub>1</sub> to  
266 S<sub>18</sub> (Table 2). From our amplicon sequencing data, we noticed that the rearrangements  
267 associated with shortened CRISPR3 arrays occurred between repeat-spacer junctions leaving  
268 behind perfectly intact repeat-spacer-repeat sequences that are still functional for CRISPR  
269 interference (Fig 2). This observation led us to hypothesize that either homologous  
270 recombination or slippage during DNA replication plays a role in eliminating spacers from the  
271 array, as has also been hypothesized by other groups (33, 34, 37, 38).

272

273 To study if homologous recombination had an impact on spacer loss, we constructed an in-  
274 frame deletion of *recA* in T11RF, generating strain T11RF $\Delta$ *recA*, and used it as a recipient in



275 conjugation reactions with the donor OG1SSp(pAM714). We confirmed the presence of a wild  
276 type CRISPR3 array in the *recA* mutant with Sanger sequencing. Across three independent  
277 trials, only 12 transconjugant colonies were obtained. We selected two transconjugants  
278 (*recA*.TC1 and *recA*.TC2) for 14 day serial passaging with continuous erythromycin selection.  
279 PCR analysis for CRISPR3 amplicons of Day 0 *recA*.TC1 and *recA*.TC2 transconjugant  
280 colonies and the amplicons after 1 and 14 days of passage in erythromycin are shown in Figure  
281 6. We used Sanger sequencing to assess spacer loss events in Day 1 and Day 14 populations,  
282 but not Day 0 transconjugants. We determined that *recA*.TC1 had lost S<sub>6</sub> after 1 day of passage  
283 in erythromycin, while the *recA*.TC2 population had a deletion of S<sub>6</sub>-S<sub>7</sub>. The same CRISPR3  
284 alleles detected by Sanger sequencing after 1 day of passage were also observed at Day 14.

285

286 **CRISPR-plasmid conflict leads to array-specific diversification in functionally linked**  
287 **CRISPR loci.** Some *E. faecalis* strains possess the CRISPR1-Cas locus, a Type II CRISPR-  
288 Cas system that is distinct in sequence and function from the CRISPR3-Cas system of *E.*  
289 *faecalis* T11RF (22, 32). The CRISPR1-Cas system possesses identical repeats and is  
290 functionally linked to the orphan CRISPR2 locus, which occurs in all *E. faecalis* (22, 32, 39, 46).  
291 We wanted to determine if introducing a plasmid targeted by either CRISPR1-Cas or CRISPR2  
292 would impact the integrity of the other locus within the same cell under continuous antibiotic  
293 selection for the plasmid target.

294

295 For these studies, we used the well-characterized human oral isolate OG1RF in combination  
296 with pKH12-derived plasmids (Table 1) that were described by Hullahalli et al (39). pKH12 is a  
297 chloramphenicol resistant shuttle vector that is mobilizable by the *oriT* sequence derived from  
298 the PRP, pCF10. Unlike pAD1, it does not encode any post segregational killing mechanisms  
299 and its antibiotic resistance determinant is not encoded on a transposable element. pKHS96  
300 contains an engineered CRISPR1-Cas protospacer that is targeted by OG1RF CRISPR1-Cas

301 S<sub>4</sub> and pKHS5 contains an engineered CRISPR2 protospacer that is targeted by OG1RF  
302 CRISPR2 S<sub>6</sub>. The consensus PAM sequence for both CRISPR1-Cas and CRISPR2 is NGG  
303 (32) and was included adjacent to the engineered protospacers. pKH12, pKHS96 and pKHS5  
304 were each transformed into electrocompetent OG1RF. The initial integrity of the CRISPR1-Cas  
305 and CRISPR2 arrays, regardless of the plasmid transformed, was confirmed to be wild-type by  
306 Sanger sequencing.

307  
308 Three transformants for each plasmid were selected to be used in serial passaging  
309 experiments. Each transformant was passaged in plain BHI medium and BHI medium  
310 supplemented with chloramphenicol for a period of 14 days. Similar to our observations for  
311 T11RF(pAM714) transconjugants, we observed plasmid loss in the absence of antibiotic (Fig  
312 7a) and variation in the size of the CRISPR1 and CRISPR2 arrays after 14 days of passage in  
313 the presence of chloramphenicol (Fig 7b). Under antibiotic selection, all pKHS96 transformants  
314 had reduced CRISPR1 arrays (all with a loss of S<sub>4</sub>), while the integrity of the CRISPR2 array  
315 remained intact. Similarly, after 14 days of antibiotic selection, two of three pKHS5  
316 transformants had reduced CRISPR2 arrays, (both with a loss of S<sub>6</sub>) while their CRISPR1 array  
317 remained of wild type size. These results show that CRISPR array mutations that relieve the  
318 conflict between CRISPR and its target are restricted to the locus that the crRNA is derived  
319 from. The otherwise functionally linked CRISPR array that coexists in the same cell experiences  
320 no diversification.

## 321 322 **Discussion**

323  
324 It has been well documented that antibiotic use contributes to the dissemination of antibiotic  
325 resistance plasmids and the emergence of MDR organisms. However, bacteria encode genome  
326 defense systems such as CRISPR-Cas to reduce plasmid acquisition. The interactions of

327 CRISPR-Cas systems and naturally occurring resistance plasmids are poorly understood, which  
328 is of particular concern in the opportunistic pathogen *E. faecalis* due to its propensity to engage  
329 in intra- and interspecies HGT.

330  
331 We previously demonstrated that the CRISPR3-Cas system of the natively drug sensitive *E.*  
332 *faecalis* isolate T11RF significantly reduced acquisition of the PRP pAM714 in a *cas9*- and  
333 spacer 6-dependent mechanism (32). The plasmid pAM714 is a derivative of the model PRP  
334 pAD1, obtained by spontaneous Tn917 insertion between the *par* and *rep* loci of pAD1 (42, 47).  
335 Antibiotic resistance on PRPs is commonly encoded within conjugative and transposable  
336 elements that are integrated into the PRP backbone (5). In this regard, pAM714 is  
337 representative of the broader pool of PRPs conferring antibiotic resistance. Although not directly  
338 assessed for their contributions here, pAM714 also encodes cytolysin and aggregation  
339 substance, two well-studied virulence factors conferred by PRPs in *E. faecalis*.

340  
341 In our previous study, we observed a substantial number of T11RF(pAM714) transconjugants,  
342 despite CRISPR3-Cas activity. Based on previous data in other organisms (33, 34, 38), we  
343 hypothesized that conjugation occurred into T11RF recipient cells with pre-existing CRISPR-  
344 inactivating mutations. However, recent data from our lab on another CRISPR-Cas system in *E.*  
345 *faecalis* and using different model strains indicated that this hypothesis was incomplete.  
346 Specifically, we observed spacer deletion mutants emerging over time in *E. faecalis* populations  
347 having CRISPR-Cas and a plasmid target in intracellular conflict (39). To attain deeper  
348 resolution, in the present study we tracked six distinct pAM714 transconjugant lineages that  
349 were predicted to experience intracellular conflict due to the presence of an active CRISPR-Cas  
350 system and its plasmid target. Our results describe multiple possible outcomes for conflict  
351 resolution between plasmids and CRISPR, with the outcome dependent on the presence or  
352 absence of antibiotic selection for the plasmid: 1) pre-existing *cas9* mutation (WT4); 2)

353 emergence of *cas9* mutation (WT1), mutant CRISPR arrays with internal spacer deletions (WT5  
354 and WT6), or both (WT2 and WT3) during passage with selection; and 3) plasmid loss in the  
355 absence of selection. Importantly, we did not observe spacer adaptation against the plasmid  
356 during passage in the absence of selection; this in contrast to other studies where spacer  
357 acquisition against non-selected plasmids was observed (23). Rather, we hypothesize that  
358 plasmid-containing cells are at a competitive disadvantage due to intracellular CRISPR/plasmid  
359 conflict (39) and are depleted from the population over time, or, a slow-acting CRISPR-Cas  
360 system progressively scrubs the plasmid from the population over time.

361  
362 We used erythromycin resistance as a marker for pAM714 carriage. We acknowledge that the  
363 erythromycin marker is encoded within Tn917, which could theoretically integrate into the  
364 chromosome and escape CRISPR targeting of the pAM714 backbone. However, erythromycin  
365 resistance was lost from five T11RF lineages passaged in the absence of selection, but not from  
366 the  $\Delta cas9$  transconjugants. This indicates that Tn917 was lost, along with the pAM714  
367 backbone, from the T11RF lineages in a CRISPR-dependent mechanism. Moreover, our  
368 analysis of the whole genome sequencing from 8 independent populations found no evidence  
369 for Tn917 hopping under erythromycin selection.

370  
371 The plasmid pAM714 encodes a toxin-antitoxin system (44, 48, 49). The system encodes a  
372 stable toxin that will kill daughter cells that have not inherited a plasmid copy; an unstable  
373 antitoxin is encoded from the same locus that blocks toxin translation in cells with proper  
374 plasmid segregation. However, in our study, we observed a gradual decrease of erythromycin-  
375 resistant cells when we passaged T11RF(pAM714) in BHI for 14 days, indicating that the toxin-  
376 antitoxin system does not have robust activity in our experiments.

377

378 We performed high-coverage Illumina sequencing to assess the dynamics of the entire set of  
379 repeats and spacers that make up the CRISPR3 array. We determined that natural  
380 heterogeneity in CRISPR3 exists at a low frequency in wild-type T11RF populations. We reason  
381 that heterogeneity could result from slippage during DNA replication and/or recombination  
382 between CRISPR3 direct repeat sequences, consistent with previous research that proposed  
383 that heterogeneity exists within CRISPR arrays in bacterial populations (33, 34, 38).  
384 Furthermore, our results demonstrate that spacer deletion can occur in the absence of *recA*,  
385 which implicates DNA replication slippage in the emergence of mutant CRISPR alleles.  
386 However, the fact that we observed the occurrence of spacer inversions indicates that  
387 homologous recombination does play a role in the inherent allelic diversity of CRISPR arrays. It  
388 is likely that both recombination and replication slippage contribute to the emergence of  
389 heterogeneous CRISPR alleles. We do not have an estimate of which process has a greater  
390 effect, nor whether additional stresses beyond antibiotic selection could influence rates for each.  
391

392 There were consequences to the resolution of CRISPR/plasmid conflicts in *E. faecalis* populations.  
393 In one case, in which pAM714 conjugated into a recipient with a pre-existing *cas9* mutation (WT4),  
394 the population could no longer impede entry of PRPs bearing CRISPR targets. For another  
395 population, WT5, its susceptibility to future plasmid transfer events was dependent upon whether it  
396 was passaged with erythromycin. The WT5 population passaged without erythromycin could  
397 impede entry of PRPs bearing CRISPR targets at levels comparable to the wild-type control.  
398 However, the WT5 population passaged with erythromycin, in which multiple CRISPR deletion  
399 alleles arose, lost the ability to defend against PRPs bearing certain spacer targets. In effect,  
400 antibiotic selection for pAM714 selected for the emergence of mutants with compromised CRISPR-  
401 Cas. We also observed that the acquisition frequencies of pCF10 and its derivatives were higher for  
402 all populations possessing pAM714 (WT5-Erm, WT4-BHI, and WT4-Erm). We infer that pAM714  
403 enhances pCF10 conjugation frequency via an unknown mechanism. This was an unanticipated

404 additional outcome of the enforced maintenance of pAM714, and it remains to be determined  
405 whether acquisition of other conjugative elements is also enhanced in pAM714-containing  
406 populations.

407

408 In this study, we investigated outcomes of CRISPR/plasmid conflicts in *E. faecalis* using two  
409 model strains (T11RF and OG1RF), three CRISPR loci (CRISPR3-Cas, and CRISPR1-Cas and  
410 CRISPR2), two plasmid families (pAM714, a PRP, and the pKH12 family of mobilizable shuttle  
411 vectors), and two antibiotic selection regimes (erythromycin and chloramphenicol). Our work  
412 underscores the impact short-term antibiotic usage has on the evolutionary trajectory of the  
413 opportunistic pathogen, *E. faecalis*.

414

## 415 **Materials and Methods**

416

417 **Strains, reagents, and routine molecular biology procedures.** Bacterial strains and plasmids  
418 used in this study are listed in Table 1. *E. faecalis* strains were grown in Brain Heart Infusion  
419 (BHI) broth or on agar plates at 37°C unless otherwise noted. Antibiotics were used for *E.*  
420 *faecalis* at the following concentrations: erythromycin, 50 µg/mL; chloramphenicol, 15 µg/mL;  
421 streptomycin, 500 µg/mL; spectinomycin, 500 µg/mL; rifampicin, 50 µg/mL; fusidic acid, 25  
422 µg/mL. *Escherichia coli* strains used for plasmid propagation and were grown in lysogeny broth  
423 (LB) broth or on agar plates at 37°C. Chloramphenicol was used at 15 µg/mL for *E. coli*. PCR  
424 was performed using *Taq* (New England Biolabs) or *Phusion* (Fisher Scientific) polymerases.  
425 Primer sequences used are in STable 1. Routine Sanger sequencing was carried out at the  
426 Massachusetts General Hospital DNA core facility (Boston, MA). *E. faecalis* electrocompetent  
427 cells were made using the lysozyme method as previously described (50).

428

429 **Generation of mutant *E. faecalis* strains and plasmids.** In-frame deletion of *recA* in T11RF  
430 was generated using a previously established protocol (51). Briefly, ~750 bp regions up- and  
431 downstream of *recA* in *E. faecalis* T11RF were amplified, digested, and ligated into pLT06 (51)  
432 to generate pWH*recA*. The resulting plasmid was transformed into competent T11RF cells via  
433 electroporation (50). Following transformation at 30°C, a shift to the non-permissive temperature  
434 of 42°C and counterselection on p-chloro-phenylalanine were performed to generate an in-  
435 frame, markerless deletion.

436  
437 To insert the T11 CRISPR3 spacer 1 (*S*<sub>1</sub>), *S*<sub>6</sub>, and *S*<sub>7</sub> sequences and CRISPR3 PAM (TTGTA)  
438 into pCF10, 47 bp and 39 bp single stranded DNA oligos were annealed to each other to  
439 generate dsDNA with restriction enzyme overhangs for *Bam*HI and *Pst*I. The annealed oligos  
440 were ligated into the pLT06 derivative pWH107 that includes sequence from pCF10 *uvrB*, to  
441 insert these sequences into the *uvrB* gene of pCF10 by homologous recombination. A knock-in  
442 protocol was performed as previously described (32).

443  
444 **Conjugation experiments.** *E. faecalis* donor and recipient strains were grown in BHI overnight  
445 to stationary phase. A 1:10 dilution was made for both donor and recipient cultures in fresh BHI  
446 broth and incubated for 1.5 hr to reach mid-exponential phase. A mixture of 100 µL donor cells  
447 and 900 µL recipient cells was pelleted and plated on BHI agar to allow conjugation. After 18 h  
448 incubation, the conjugation mixture was scraped from the plate using 2 mL 1X PBS  
449 supplemented with 2 mM EDTA. Serial dilutions were prepared from the conjugation mixture  
450 and plated on selective BHI agars. After 24-48 h incubation, colony forming units per milliliter  
451 (CFU/mL) was determined using plates with 30 - 300 colonies. The conjugation frequency was  
452 calculated as the CFU/mL of transconjugants divided by the CFU/mL of donors.

453

454 **Serial passage.** Transconjugant or transformant colonies were suspended in 50  $\mu$ L BHI broth.  
455 The 50  $\mu$ L suspension was used as follows: 3  $\mu$ L was used for PCR to confirm the integrity of  
456 the CRISPR array, 10  $\mu$ L was inoculated into plain BHI broth, another 10  $\mu$ L was inoculated into  
457 selective BHI broth for plasmid selection, and another 10  $\mu$ L was used for serial dilution and  
458 plating on selective medium to enumerate the initial number of plasmid-containing cells in the  
459 transconjugant colonies. Broth cultures were incubated for 24 h, followed by 1:1000 dilution into  
460 either fresh plain BHI or fresh selective BHI. At each 24 h interval, 3  $\mu$ L of each culture from the  
461 previous incubation was used for PCR to check CRISPR array integrity, and 10  $\mu$ L was used for  
462 serial dilution and plating on agars to determine CFU/mL for total viable cells and plasmid-  
463 containing cells. The cultures were passaged in this manner for 14 days; cryopreserved culture  
464 stocks were made daily in glycerol. To use the Day 14 transconjugant populations in  
465 conjugation reactions, the glycerol stocks were completely thawed on ice, and 20  $\mu$ L was  
466 inoculated into plain BHI broth. The cultures were incubated for 6-8 h to allow them to reach  
467 mid-exponential phase ( $OD_{600nm} \approx 0.5-0.7$ ), and 900  $\mu$ L was used as recipient in conjugation  
468 reactions as described above.

469  
470 **Deep sequencing of CRISPR3 amplicons and genomic DNA.** For CRISPR3 amplicon  
471 sequencing, 3  $\mu$ L from a broth culture was used as template in PCR using Phusion Polymerase  
472 with CR3\_seq\_F/R primers (STable1). The PCR products were purified using the Thermo  
473 Scientific PCR purification kit (Thermo Scientific). Genomic DNA was isolated using the phenol-  
474 chloroform method (52). The purified PCR amplicons and genomic DNA samples were  
475 sequenced using 2 x 150 bp paired end sequencing chemistry by Molecular Research LP (MR  
476 DNA; Texas).

477  
478 **Whole genome sequencing analysis.** T11 supercontig and pAD1 plasmid contig references  
479 were downloaded from NCBI (accession numbers: T11: NZ\_GG688637.1-NZ\_GG688649;



480 pAD1: AB007844, AF394225, AH011360, L01794, L19532, L37110, M84374, M87836, U00681,  
481 X17214, X62657, X62658). Reads were aligned to these references using default parameters in  
482 CLC Genomics Workbench (Qiagen) where  $\geq 50\%$  of each mapped read has  $\geq 80\%$  sequence  
483 identity to the reference. Variations occurring with  $\geq 35\%$  frequency at positions with  $\geq 10X$   
484 coverage between our samples and the reference contigs were detected using the Basic Variant  
485 Detector. At the same time, local realignment was performed, followed by Fixed Ploidy variant  
486 detection using default parameters and variants probability  $\geq 90\%$  in CLC Genomics Workbench.  
487 The basic variants and fixed ploidy variants were combined for each sequencing sample and  
488 subjected to manual inspection. The variants that were detected in the T11 genome from all  
489 samples were inferred to be variants in our parent T11 stock and were manually removed. The  
490 variants that were detected in pAD1 genome from all transconjugant samples were inferred to  
491 be variants in our pAM714 stock, hence were also manually removed. Next, variants within the  
492 CRISPR3 array were removed as we analyzed CRISPR3 alleles using a different approach  
493 (amplicon deep sequencing; see below). All variants detected from all populations were  
494 manually checked for coverage depth to eliminate the detection bias. The variants detected in  
495 all samples are shown in STable2.

496

497 **Analysis of CRISPR3 amplicon sequencing.** Reads from the 1,763 bp CRISPR3 amplicon  
498 were mapped to the T11 CRISPR3 reference (NZ\_GG688647.1, positions 646834 - 648596)  
499 using stringent mapping conditions in CLC Genomics Workbench. The stringent mapping  
500 conditions require 100% of each mapped read to have  $\geq 95\%$  identity to the reference. The  
501 percent mapped reads were calculated by dividing the number of reads mapped by the total  
502 number of reads, these percentages are listed in STable3, step 1. The coverage depth was then  
503 calculated for each position within the PCR amplicon region using CLC Genomics Workbench,  
504 normalized using reads per million, and plotted against reference positions (Fig 3).

505

506 To further analyze CRISPR3 spacer deletions and rearrangements, we manually created  
507 CRISPR3 references. The CRISPR3 amplicon references contain two spacers connected by a  
508 T11 CRISPR3-Cas repeat: 5'-spacer[x]-repeat-spacer[y]-3' (5'-S<sub>x</sub>RS<sub>y</sub>-3'), where spacer[x] and  
509 spacer[y] could be 30 bp upstream of the first repeat (leader end; or S<sub>0</sub> hereafter; Fig S1a), or  
510 any internal spacer within the CRISPR3 array (from spacer 1 to spacer 21; or S<sub>1</sub> to S<sub>21</sub>; Fig  
511 S1a). Each manually generated CRISPR3 amplicon reference is 96 bp in length. The references  
512 where y=x+1 represent wild-type alleles. The terminal repeat following S<sub>21</sub> in the CRISPR3 array  
513 is divergent from the regular direct repeat sequence, so references containing 5'-spacer[x]-  
514 TerminalRepeat-S<sub>T</sub>-3' (5'-S<sub>x</sub>TRS<sub>T</sub>-3') were constructed, where spacer[x] ranges from S<sub>0</sub> to S<sub>21</sub>  
515 and spacer S<sub>T</sub> represents the sequence 30 bp downstream of the terminal repeat (Fig S1a). The  
516 5'-S<sub>21</sub>TRS<sub>T</sub>-3' reference represents the wild-type. In total, 484 references with length of 96 bp  
517 were generated for the CRISPR3 amplicon. Considering that the read length is 150 bp, we  
518 manually split each read into two subsequences (one subsequence was 75 bp; with the  
519 remainder of the read being the second subsequence) to enhance mapping efficiency, allowing  
520 for retrieval of maximal sequence information. The split amplicon sequencing reads were  
521 mapped to the 5'-S<sub>x</sub>RS<sub>y</sub>-3' and 5'-S<sub>x</sub>TRS<sub>T</sub>-3' references using stringent mapping parameters in  
522 CLC Genomics Workbench (Qiagen). The stringent mapping parameters require 100% of each  
523 mapped read to be ≥95% identical to one unique reference. Thus, the sequencing reads from  
524 different CRISPR alleles will be distinguished. These amplicon mapping results were applied to  
525 the calculation of forward spacer deletion and backward spacer rearrangement rates.

526  
527 To further evaluate the mapping efficiency, the unmapped reads from initial mapping to the T11  
528 CRISPR3 reference (STable3, step 1) were subjected to additional quality control analysis. The  
529 unmapped reads were mapped to the 484 manually created spacer[x]-repeat-spacer[y]  
530 references using the same mapping parameters in CLC as above (STable3, step 2 mapping;  
531 ignore unspecific mapping). The unmapped reads from step 2 were subjected to mapping to all

532 possible references (CRISPR3 region plus manually created references) using default mapping  
533 parameters, ignoring unspecific mapping (80% of each mapped read has at least 50% identity  
534 to the reference sequence; STable3, step 3 mapping). The unmapped reads from step 3 were  
535 mapped to all possible references using the default mapping parameters and randomly map  
536 unspecific matching reads (STable3, step 4 mapping).

537

538 **Forward spacer deletion and backward spacer rearrangement.** We observed two categories  
539 of mutant CRISPR3 alleles: 5'-S<sub>x</sub>RS<sub>y</sub>-3' (y > x+1) and 5'-S<sub>x</sub>RS<sub>y</sub>-3' (y < x). The forward deletion  
540 mutants with 5'-S<sub>x</sub>RS<sub>y</sub>-3' (y > x+1) are the result of spacer deletions, with spacers from S<sub>x+1</sub> to  
541 S<sub>y-1</sub> deleted; while the backward rearrangement mutants with 5'-S<sub>x</sub>RS<sub>y</sub>-3' (y < x) are the result of  
542 spacer rearrangement, where a downstream spacer S<sub>y</sub> flips to become upstream of an  
543 upstream spacer S<sub>x</sub>. To study if there were positional preferences, the average forward spacer  
544 deletion rate and backward spacer rearrangement rate was calculated for each 5'-S<sub>x</sub> (0 < x <  
545 21) within the CRISPR3 array. For each 5'-S<sub>x</sub>, the average forward deletion and backward  
546 rearrangement rate are calculated as:

$$547 \quad P(5'-S_x \text{ Forward}) = \frac{\# \text{ mapped reads to the reference of } 5'-S_x R S_y - 3'}{\sum_{y=x+1}^n \# \text{ mapped reads to the references of } 5'-S_x R S_y - 3' \text{ and } 5'-S_n T R S T - 3'}$$

$$548 \quad P(5'-S_x \text{ Backward}) = \frac{\# \text{ mapped reads to the reference of } 5'-S_x R S_y - 3'}{\sum_{y=0}^{x-1} \# \text{ mapped reads to the references of } 5'-S_x R S_y - 3'}$$

549 where n is the total number of spacers within a CRISPR array, hence S<sub>n</sub> represents terminal  
550 spacer, as described above (Fig S1a).

551

552 **Accession number.**

553 The sequencing data for amplicon and whole genome sequencing analysis of transconjugant  
554 populations has been deposited in the NCBI Sequence Read Archive under BioProject ID:  
555 PRJNA418345.

556

## 557 **Acknowledgements**

558 This work was supported by Public Health Service grant R01AI116610 to K.L.P and the Cecil H.  
559 and Ida Green Chair to M.Q.Z. We thank Karthik Hullahalli for construction of pKH12 and its  
560 derivatives. We thank Dr. Chen Jia for consultation on data analysis methods.

561

## 562 **References**

- 563 1. **Lebreton F, Willems RJL, Gilmore MS.** 2014. Enterococcus Diversity, Origins in  
564 Nature, and Gut Colonization. *In* Gilmore MS, Clewell DB, Ike Y, Shankar N (ed.),  
565 Enterococci: From Commensals to Leading Causes of Drug Resistant Infection, Boston.
- 566 2. **Kristich CJ, Djoric D, Little JL.** 2014. Genetic basis for vancomycin-enhanced  
567 cephalosporin susceptibility in vancomycin-resistant enterococci revealed using  
568 counterselection with dominant-negative thymidylate synthase. *Antimicrobial agents and*  
569 *chemotherapy* **58**:1556-1564.
- 570 3. **Uttley AH, George RC, Naidoo J, Woodford N, Johnson AP, Collins CH, Morrison**  
571 **D, Gilfillan AJ, Fitch LE, Heptonstall J.** 1989. High-level vancomycin-resistant  
572 enterococci causing hospital infections. *Epidemiology and infection* **103**:173-181.
- 573 4. **Huycke MM, Sahm DF, Gilmore MS.** 1998. Multiple-drug resistant enterococci: the  
574 nature of the problem and an agenda for the future. *Emerging infectious diseases* **4**:239.
- 575 5. **Clewell DB, Weaver KE, Dunny GM, Coque TM, Francia MV, Hayes F.** 2014.  
576 Extrachromosomal and Mobile Elements in Enterococci: Transmission, Maintenance,  
577 and Epidemiology. *In* Gilmore MS, Clewell DB, Ike Y, Shankar N (ed.), Enterococci:  
578 From Commensals to Leading Causes of Drug Resistant Infection, Boston.
- 579 6. **Palmer KL, Kos VN, Gilmore MS.** 2010. Horizontal gene transfer and the genomics of  
580 enterococcal antibiotic resistance. *Current opinion in microbiology* **13**:632-639.
- 581 7. **Hegstad K, Mikalsen T, Coque T, Werner G, Sundsfjord A.** 2010. Mobile genetic  
582 elements and their contribution to the emergence of antimicrobial resistant *Enterococcus*  
583 *faecalis* and *Enterococcus faecium*. *Clinical microbiology and infection* **16**:541-554.

- 584 8. **Clewell DB.** 2007. Properties of *Enterococcus faecalis* plasmid pAD1, a member of a  
585 widely disseminated family of pheromone-responding, conjugative, virulence elements  
586 encoding cytolysin. *Plasmid* **58**:205-227.
- 587 9. **Dunny GM.** 2007. The peptide pheromone-inducible conjugation system of  
588 *Enterococcus faecalis* plasmid pCF10: cell-cell signalling, gene transfer, complexity and  
589 evolution. *Philosophical transactions of the Royal Society of London. Series B, Biological*  
590 *sciences* **362**:1185-1193.
- 591 10. **Gilmore MS, Segarra RA, Booth MC, Bogie CP, Hall LR, Clewell DB.** 1994. Genetic  
592 structure of the *Enterococcus faecalis* plasmid pAD1-encoded cytolytic toxin system and  
593 its relationship to lantibiotic determinants. *Journal of bacteriology* **176**:7335-7344.
- 594 11. **Jasni AS, Mullany P, Hussain H, Roberts AP.** 2010. Demonstration of conjugative  
595 transposon (Tn5397)-mediated horizontal gene transfer between *Clostridium difficile* and  
596 *Enterococcus faecalis*. *Antimicrobial agents and chemotherapy* **54**:4924-4926.
- 597 12. **Showsh SA, De Boever EH, Clewell DB.** 2001. Vancomycin Resistance Plasmid in  
598 *Enterococcus faecalis* That Encodes Sensitivity to a Sex Pheromone Also Produced by  
599 *Staphylococcus aureus*. *Antimicrobial agents and chemotherapy* **45**:2177-2178.
- 600 13. **Tsvetkova K, Marvaud JC, Lambert T.** 2010. Analysis of the mobilization functions of  
601 the vancomycin resistance transposon Tn1549, a member of a new family of conjugative  
602 elements. *Journal of bacteriology* **192**:702-713.
- 603 14. **Zhu W, Murray PR, Huskins WC, Jernigan JA, McDonald LC, Clark NC, Anderson**  
604 **KF, McDougal LK, Hageman JC, Olsen-Rasmussen M, Frace M, Alangaden GJ,**  
605 **Chenoweth C, Zervos MJ, Robinson-Dunn B, Schreckenberger PC, Reller LB,**  
606 **Rudrik JT, Patel JB.** 2010. Dissemination of an *Enterococcus* Inc18-Like *vanA* plasmid  
607 associated with vancomycin-resistant *Staphylococcus aureus*. *Antimicrobial agents and*  
608 *chemotherapy* **54**:4314-4320.
- 609 15. **Barrangou R, Fremaux C, Deveau H, Richards M, Boyaval P, Moineau S, Romero**  
610 **DA, Horvath P.** 2007. CRISPR provides acquired resistance against viruses in  
611 prokaryotes. *Science* **315**:1709-1712.
- 612 16. **Marraffini LA, Sontheimer EJ.** 2008. CRISPR interference limits horizontal gene  
613 transfer in staphylococci by targeting DNA. *Science* **322**:1843-1845.
- 614 17. **Makarova KS, Wolf YI, Alkhnbashi OS, Costa F, Shah SA, Saunders SJ, Barrangou**  
615 **R, Brouns SJ, Charpentier E, Haft DH, Horvath P, Moineau S, Mojica FJ, Terns RM,**  
616 **Terns MP, White MF, Yakunin AF, Garrett RA, van der Oost J, Backofen R, Koonin**

- 617 **EV.** 2015. An updated evolutionary classification of CRISPR-Cas systems. *Nature*  
618 *reviews. Microbiology* **13**:722-736.
- 619 18. **Jansen R, Embden JD, Gaastra W, Schouls LM.** 2002. Identification of genes that are  
620 associated with DNA repeats in prokaryotes. *Mol Microbiol* **43**:1565-1575.
- 621 19. **Mojica FJ, Diez-Villasenor C, Garcia-Martinez J, Soria E.** 2005. Intervening  
622 sequences of regularly spaced prokaryotic repeats derive from foreign genetic elements.  
623 *Journal of molecular evolution* **60**:174-182.
- 624 20. **Shmakov SA, Sitnik V, Makarova KS, Wolf YI, Severinov KV, Koonin EV.** 2017. The  
625 CRISPR Spacer Space Is Dominated by Sequences from Species-Specific Mobilomes.  
626 *mBio* **8**:e01397-01317.
- 627 21. **Bourgogne A, Garsin DA, Qin X, Singh KV, Sillanpaa J, Yerrapragada S, Ding Y,**  
628 **Dugan-Rocha S, Buhay C, Shen H, Chen G, Williams G, Muzny D, Maadani A, Fox**  
629 **KA, Gioia J, Chen L, Shang Y, Arias CA, Nallapareddy SR, Zhao M, Prakash VP,**  
630 **Chowdhury S, Jiang H, Gibbs RA, Murray BE, Highlander SK, Weinstock GM.** 2008.  
631 Large scale variation in *Enterococcus faecalis* illustrated by the genome analysis of  
632 strain OG1RF. *Genome biology* **9**:R110.
- 633 22. **Palmer KL, Gilmore MS.** 2010. Multidrug-resistant enterococci lack CRISPR-cas. *MBio*  
634 **1**.
- 635 23. **Garneau JE, Dupuis ME, Villion M, Romero DA, Barrangou R, Boyaval P, Fremaux**  
636 **C, Horvath P, Magadan AH, Moineau S.** 2010. The CRISPR/Cas bacterial immune  
637 system cleaves bacteriophage and plasmid DNA. *Nature* **468**:67-71.
- 638 24. **Jinek M, Chylinski K, Fonfara I, Hauer M, Doudna JA, Charpentier E.** 2012. A  
639 programmable dual-RNA-guided DNA endonuclease in adaptive bacterial immunity.  
640 *Science* **337**:816-821.
- 641 25. **Nishimasu H, Ran FA, Hsu PD, Konermann S, Shehata SI, Dohmae N, Ishitani R,**  
642 **Zhang F, Nureki O.** 2014. Crystal structure of Cas9 in complex with guide RNA and  
643 target DNA. *Cell* **156**:935-949.
- 644 26. **Anders C, Niewoehner O, Duerst A, Jinek M.** 2014. Structural basis of PAM-  
645 dependent target DNA recognition by the Cas9 endonuclease. *Nature* **513**:569-573.
- 646 27. **Wei Y, Terns RM, Terns MP.** 2015. Cas9 function and host genome sampling in Type  
647 II-A CRISPR-Cas adaptation. *Genes Dev* **29**:356-361.

- 648 28. **Heler R, Samai P, Modell JW, Weiner C, Goldberg GW, Bikard D, Marraffini LA.**  
649 2015. Cas9 specifies functional viral targets during CRISPR–Cas adaptation. *Nature*  
650 **519**:199.
- 651 29. **Deltcheva E, Chylinski K, Sharma CM, Gonzales K, Chao Y, Pirzada ZA, Eckert MR,**  
652 **Vogel J, Charpentier E.** 2011. CRISPR RNA maturation by trans-encoded small RNA  
653 and host factor RNase III. *Nature* **471**:602-607.
- 654 30. **Sapranauskas R, Gasiunas G, Fremaux C, Barrangou R, Horvath P, Siksnys V.**  
655 2011. The *Streptococcus thermophilus* CRISPR/Cas system provides immunity in  
656 *Escherichia coli*. *Nucleic acids research* **39**:9275-9282.
- 657 31. **Sternberg SH, Redding S, Jinek M, Greene EC, Doudna JA.** 2014. DNA interrogation  
658 by the CRISPR RNA-guided endonuclease Cas9. *Nature* **507**:62-67.
- 659 32. **Price VJ, Huo W, Sharifi A, Palmer KL.** 2016. CRISPR-Cas and Restriction-  
660 Modification Act Additively against Conjugative Antibiotic Resistance Plasmid Transfer in  
661 *Enterococcus faecalis*. *mSphere* **1**:e00064-00016.
- 662 33. **Jiang W, Maniv I, Arain F, Wang Y, Levin BR, Marraffini LA.** 2013. Dealing with the  
663 evolutionary downside of CRISPR immunity: bacteria and beneficial plasmids. *PLoS*  
664 *genetics* **9**:e1003844.
- 665 34. **Lopez-Sanchez MJ, Sauvage E, Da Cunha V, Clermont D, Ratsima Hariniaina E,**  
666 **Gonzalez-Zorn B, Poyart C, Rosinski-Chupin I, Glaser P.** 2012. The highly dynamic  
667 CRISPR1 system of *Streptococcus agalactiae* controls the diversity of its mobilome. *Mol*  
668 *Microbiol* **85**:1057-1071.
- 669 35. **Boudry P, Semenova E, Monot M, Datsenko KA, Lopatina A, Sekulovic O, Ospina-**  
670 **Bedoya M, Fortier L-C, Severinov K, Dupuy B.** 2015. Function of the CRISPR-Cas  
671 system of the human pathogen *Clostridium difficile*. *MBio* **6**:e01112-01115.
- 672 36. **Jiang W, Bikard D, Cox D, Zhang F, Marraffini LA.** 2013. RNA-guided editing of  
673 bacterial genomes using CRISPR-Cas systems. *Nature biotechnology* **31**:233-239.
- 674 37. **Bikard D, Hatoum-Aslan A, Mucida D, Marraffini LA.** 2012. CRISPR interference can  
675 prevent natural transformation and virulence acquisition during in vivo bacterial infection.  
676 *Cell host & microbe* **12**:177-186.
- 677 38. **Gudbergdottir S, Deng L, Chen Z, Jensen JV, Jensen LR, She Q, Garrett RA.**  
678 2011. Dynamic properties of the *Sulfolobus* CRISPR/Cas and CRISPR/Cmr systems



- 679 when challenged with vector-borne viral and plasmid genes and protospacers. Mol  
680 Microbiol **79**:35-49.
- 681 39. **Hullahalli K, Rodrigues M, Palmer KL.** 2017. Exploiting CRISPR-Cas to manipulate  
682 *Enterococcus faecalis* populations. Elife **6**.
- 683 40. **Hoyland-Kroghsbo NM, Paczkowski J, Mukherjee S, Broniewski J, Westra E,**  
684 **Bondy-Denomy J, Bassler BL.** 2017. Quorum sensing controls the *Pseudomonas*  
685 *aeruginosa* CRISPR-Cas adaptive immune system. Proceedings of the National  
686 Academy of Sciences of the United States of America **114**:131-135.
- 687 41. **Rauch BJ, Silvis MR, Hultquist JF, Waters CS, McGregor MJ, Krogan NJ, Bondy-**  
688 **Denomy J.** 2017. Inhibition of CRISPR-Cas9 with bacteriophage proteins. Cell **168**:150-  
689 158. e110.
- 690 42. **Clewell DB, Tomich PK, Gawron-Burke MC, Franke AE, Yagi Y, An FY.** 1982.  
691 Mapping of *Streptococcus faecalis* plasmids pAD1 and pAD2 and studies relating to  
692 transposition of Tn917. Journal of bacteriology **152**:1220-1230.
- 693 43. **Ike Y, Clewell DB, Segarra RA, Gilmore MS.** 1990. Genetic analysis of the pAD1  
694 hemolysin/bacteriocin determinant in *Enterococcus faecalis*: Tn917 insertional  
695 mutagenesis and cloning. Journal of bacteriology **172**:155-163.
- 696 44. **Weaver KE, Tritle DJ.** 1994. Identification and characterization of an *Enterococcus*  
697 *faecalis* plasmid pAD1-encoded stability determinant which produces two small RNA  
698 molecules necessary for its function. Plasmid **32**:168-181.
- 699 45. **Dunny G, Yuhasz M, Ehrenfeld E.** 1982. Genetic and physiological analysis of  
700 conjugation in *Streptococcus faecalis*. Journal of bacteriology **151**:855-859.
- 701 46. **Hullahalli K, Rodrigues M, Schmidt BD, Li X, Bhardwaj P, Palmer KL.** 2015.  
702 Comparative Analysis of the Orphan CRISPR2 Locus in 242 *Enterococcus faecalis*  
703 Strains. PloS one **10**:e0138890.
- 704 47. **Ike Y, Clewell DB.** 1984. Genetic analysis of the pAD1 pheromone response in  
705 *Streptococcus faecalis*, using transposon Tn917 as an insertional mutagen. Journal of  
706 bacteriology **158**:777-783.
- 707 48. **Greenfield TJ, Ehli E, Kirshenmann T, Franch T, Gerdes K, Weaver KE.** 2000. The  
708 antisense RNA of the *par* locus of pAD1 regulates the expression of a 33-amino-acid  
709 toxic peptide by an unusual mechanism. Mol Microbiol **37**:652-660.



- 710 49. **Weaver KE, Clewell DB.** 1989. Construction of *Enterococcus faecalis* pAD1  
711 miniplasmids: identification of a minimal pheromone response regulatory region and  
712 evaluation of a novel pheromone-dependent growth inhibition. *Plasmid* **22**:106-119.
- 713 50. **Bae T, Kozlowski B, Dunny GM.** 2002. Two targets in pCF10 DNA for PrgX binding:  
714 their role in production of Qa and *prgX* mRNA and in regulation of pheromone-inducible  
715 conjugation. *Journal of molecular biology* **315**:995-1007.
- 716 51. **Thurlow LR, Thomas VC, Hancock LE.** 2009. Capsular polysaccharide production in  
717 *Enterococcus faecalis* and contribution of CpsF to capsule serospecificity. *Journal of*  
718 *bacteriology* **191**:6203-6210.
- 719 52. **Manson JM, Keis S, Smith JMB, Cook GM.** 2003. A Clonal Lineage of VanA-Type  
720 *Enterococcus faecalis* Predominates in Vancomycin-Resistant Enterococci Isolated in  
721 New Zealand. *Antimicrobial agents and chemotherapy* **47**:204-210.
- 722 53. **Palmer KL, Godfrey P, Griggs A, Kos VN, Zucker J, Desjardins C, Cerqueira G,**  
723 **Gevers D, Walker S, Wortman J, Feldgarden M, Haas B, Birren B, Gilmore MS.**  
724 2012. Comparative genomics of enterococci: variation in *Enterococcus faecalis*, clade  
725 structure in *E. faecium*, and defining characteristics of *E. gallinarum* and *E. casseliflavus*.  
726 *MBio* **3**:e00318-00311.
- 727 54. **Gold OG, Jordan HV, van Houte J.** 1975. The prevalence of enterococci in the human  
728 mouth and their pathogenicity in animal models. *Archives of oral biology* **20**:473-477.
- 729 55. **Perez-Casal J, Caparon MG, Scott JR.** 1991. Mry, a trans-acting positive regulator of  
730 the M protein gene of *Streptococcus pyogenes* with similarity to the receptor proteins of  
731 two-component regulatory systems. *Journal of bacteriology* **173**:2617-2624.
- 732 56. **Andersson AF, Banfield JF.** 2008. Virus population dynamics and acquired virus  
733 resistance in natural microbial communities. *Science* **320**:1047-1050.  
734

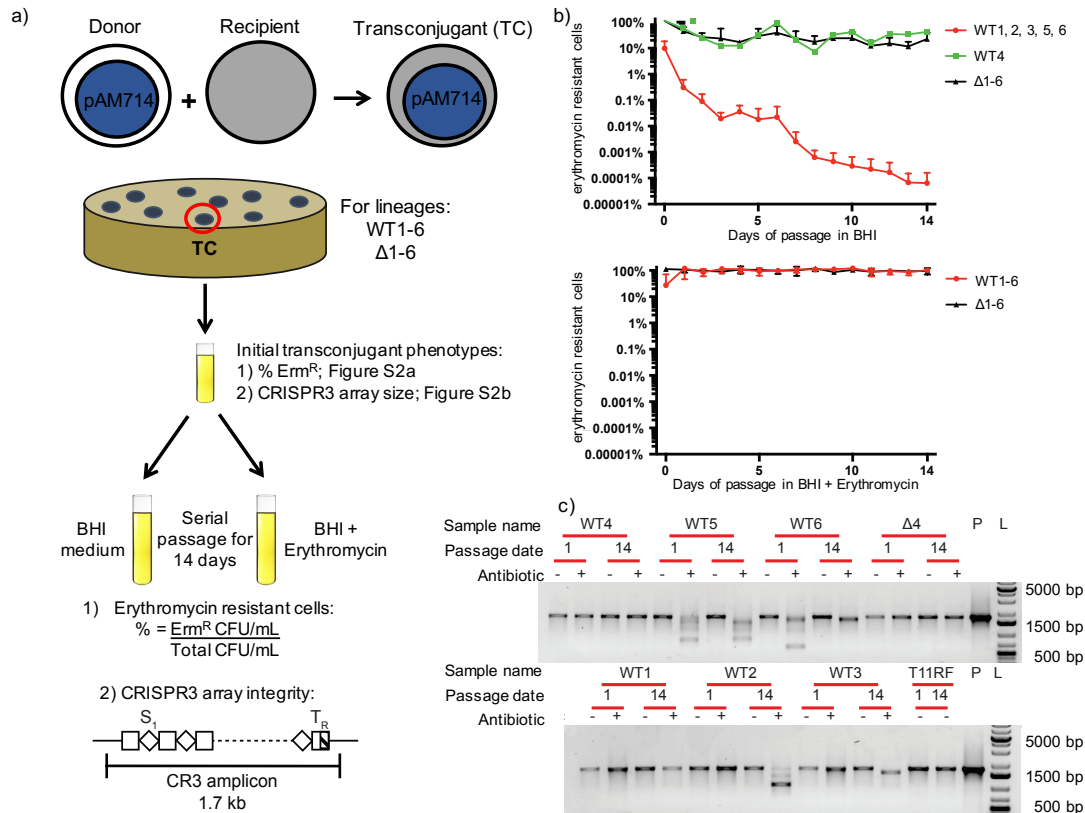

735  
736  
737

**Figure 1. Antibiotic selection-specific phenotypes after serial passaging reflect outcomes**

738 **of plasmid-host interactions.** a) Design of serial passage experiment. Randomly selected

739 T11RF(pAM714) and T11RFΔ*cas9*(pAM714) transconjugants were passaged for 14 days in the

740 presence and absence of antibiotic selection for pAM714. These populations were monitored

741 daily for: 1) erythromycin resistant cells by determining the percentage of erythromycin

742 resistance relative to the total cell population and 2) deviations in the CRISPR3 array by

743 amplifying the 1.7 kb region encompassing the CRISPR3 array. b) percentage of erythromycin

744 resistance over the course of passage without (top) and with (bottom) antibiotic selection. WT

745 populations are shown in green or red and Δ*cas9* populations are shown in black. c) CRISPR3

746 amplicon size from early (Day 1) and late (Day 14) passage dates for six WT transconjugant

747 populations and a representative Δ*cas9* transconjugant population (Δ4). As a control, T11RF

748 without pAM714 was passaged for 14 days and the CRISPR3 locus was queried (T11RF). P:

749 positive control, T11RF genomic DNA. L: DNA ladder.

750  
751  
752

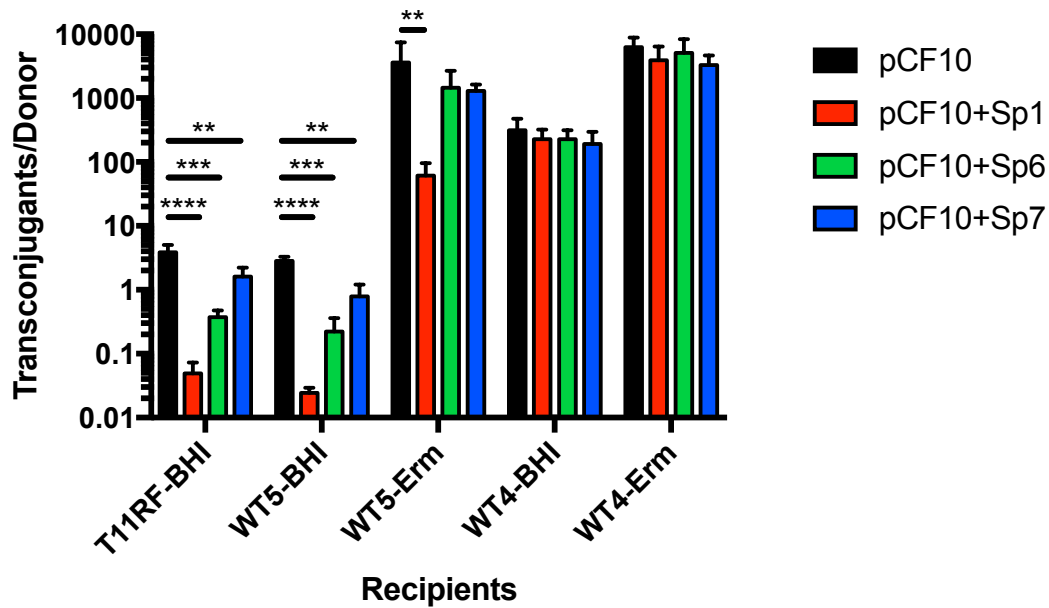

753  
754  
755  
756  
757  
758  
759  
760  
761  
762  
763  
764  
765

**Figure 2. Compromised CRISPR-Cas primes populations for MGE acquisition.** Day 14 transconjugant populations passaged in BHI and erythromycin were used as recipients in conjugation with OG1SSp pCF10 and derivatives with protospacers corresponding to spacers 1, 6 and 7 of the T11RF CRISPR3 array. The Day 14 BHI-passaged T11RF control population was used as recipient in conjugation, serving as control; pCF10 is not targeted by CRISPR3-Cas and pCF10+Sp1, Sp6 and Sp7 are all targeted. Based on the results of conjugation with the T11RF control population, we concluded that the degree of interference was different for each target where defense against a MGE bearing a target for S<sub>7</sub> was weak compared to S<sub>1</sub> and S<sub>6</sub>. The graph shows the conjugation frequency or ratio of transconjugants to donors from mating reactions. Statistical significance was determined using a student's t-test; P-values: \*\* ≤ 0.01; \*\*\* ≤ 0.001; \*\*\*\* ≤ 0.0001.

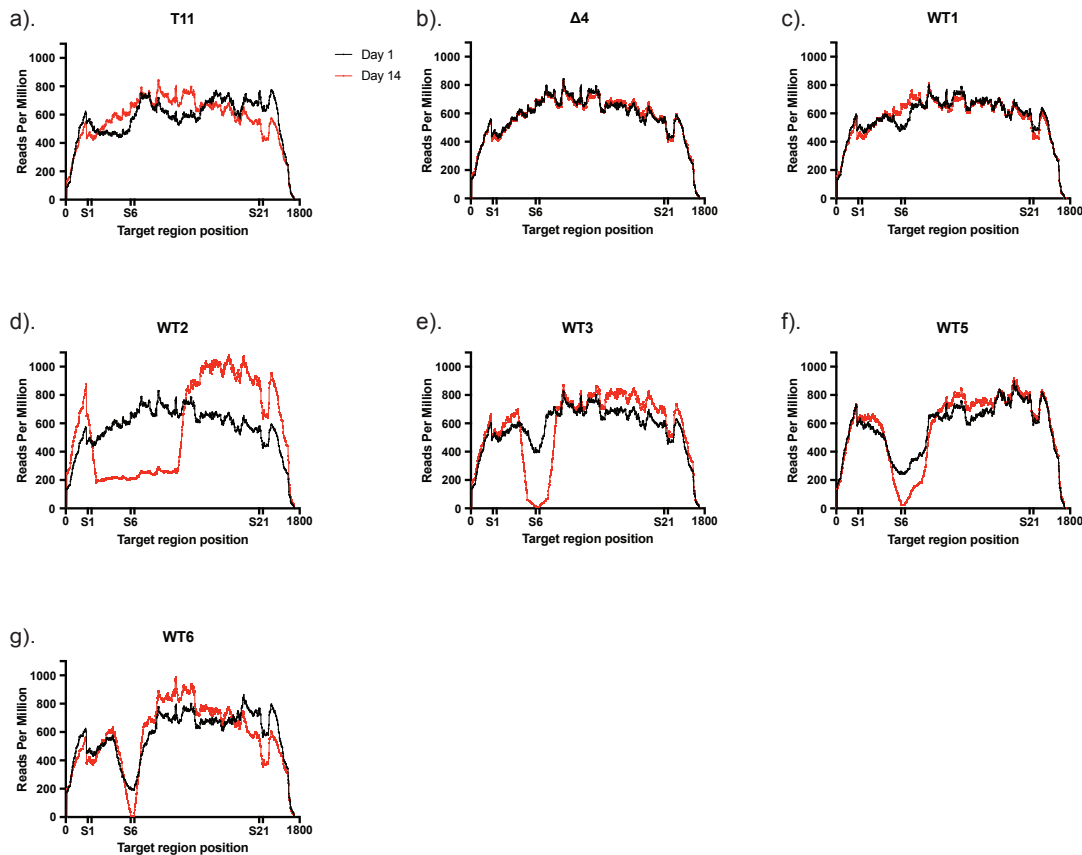

766  
767  
768

**Figure 3. Targeted sequencing revealed stochastic spacer loss after passage in**

769 **antibiotic.** The coverage depth is calculated for each position within the amplicon and  
770 normalized using reads per million, which is then plotted against the genomic position. For each  
771 sample, the results for Day 1 and Day 14 are represented in black and red lines, respectively.

772 The beginning and end of the regions along the amplicon corresponding to S<sub>1</sub>, S<sub>6</sub> and S<sub>21</sub> within  
773 the CRISPR3 array are labeled with vertical hash marks on the x-axis. a) BHI passaged T11RF  
774 parent strain. b) Erythromycin passaged  $\Delta 4$  transconjugant. c-g) Erythromycin passaged WT  
775 transconjugants. Here, the WT4 population is not included due to the inactivating *cas9* mutation,

776 as discussed in the main text.

777

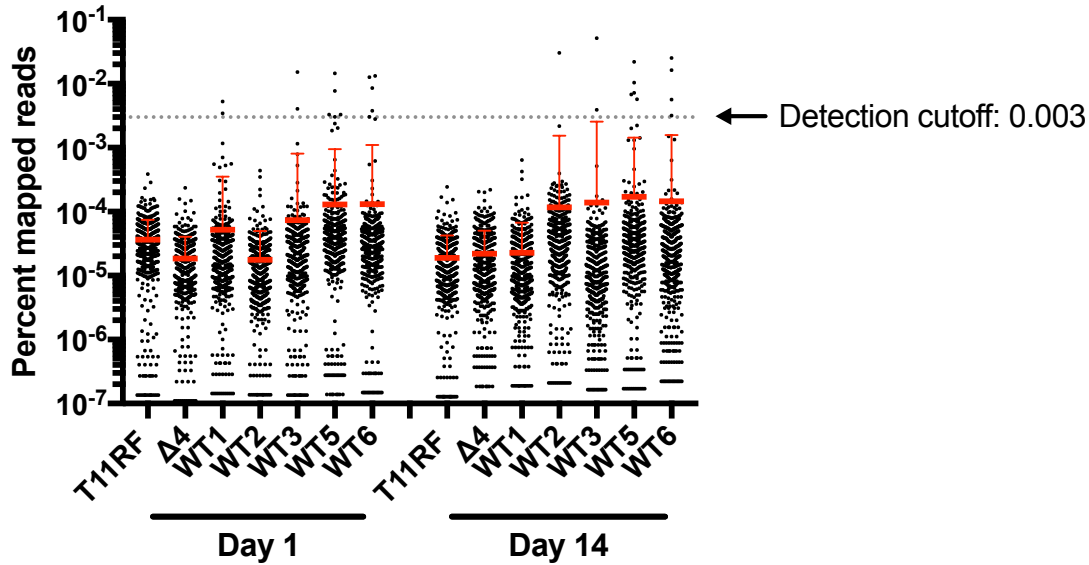

778

779

780 **Figure 4. Distribution of mutant CRISPR3 array alleles among antibiotic-passaged wild-type**

781 **transconjugants.** Percent mapped reads were calculated for each artificial reference by dividing

782 mapped reads at each position to the total number of mapped reads. The percent mapped reads to

783 mutant alleles (dots) are shown here with average (thick red bar) and standard deviation (thin red

784 bar). A detection cutoff value was applied so that mutant alleles with high abundances can be

785 detected.

786

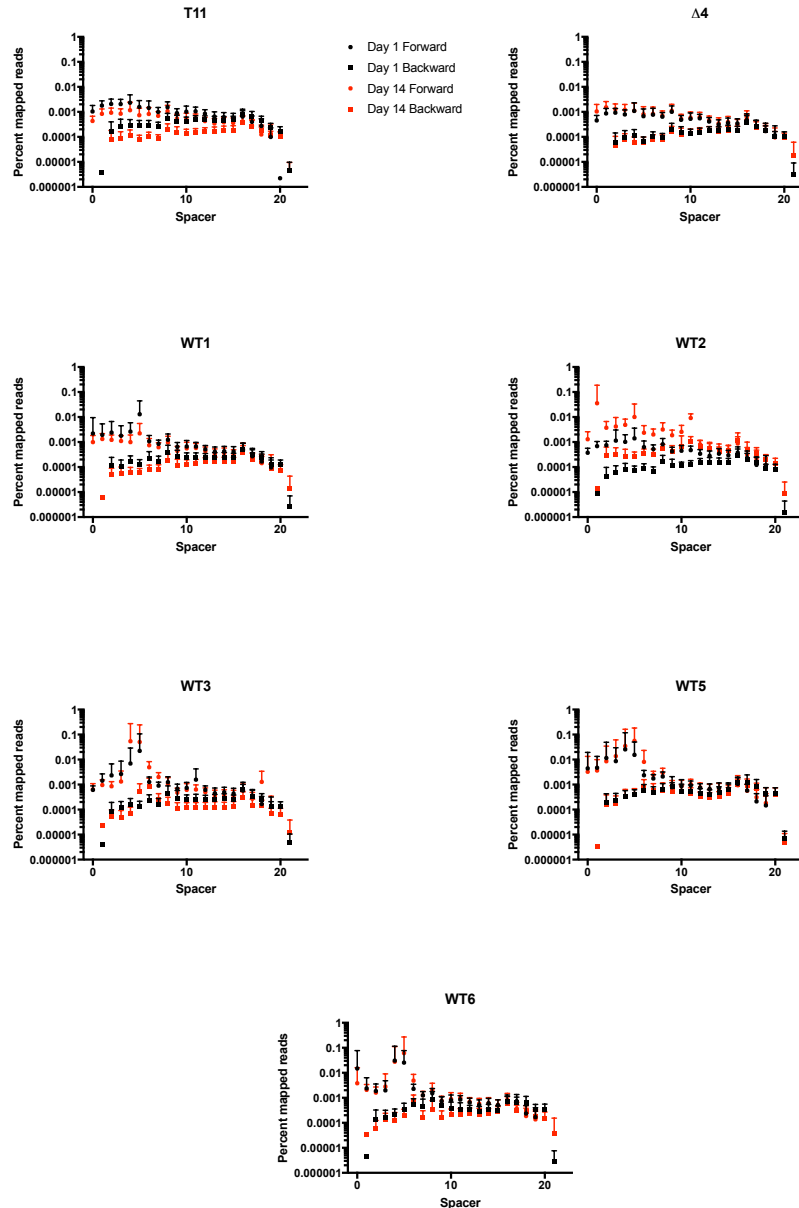

787  
788  
789 **Figure 5. Mutant CRISPR alleles arise predominately through forward spacer deletion**  
790 **events.** The forward spacer deletion and backward rearrangement rates (y-axis) were  
791 calculated for the CRISPR3 amplicon of each passaged population and are plotted against each  
792 spacer occurring in the CRISPR3 array shown on the x-axis. For each sample, the forward  
793 deletion (dots) and backward rearrangement (squares) rates for Day 1 and Day 14 of the  
794 passage are shown in black and red, respectively. a) BHI passaged T11RF parent strain. b)  
795 Erythromycin passaged  $\Delta 4$  transconjugant. c-g) Erythromycin passaged WT transconjugants.

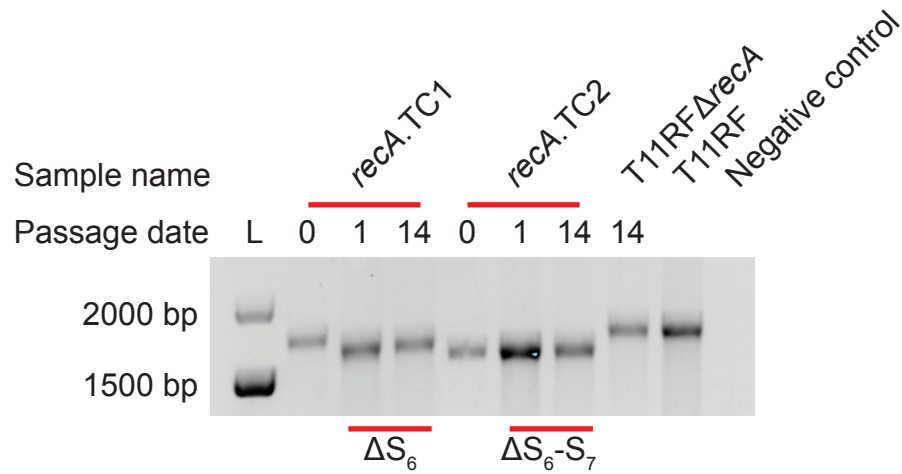

796

797

798

799

800

801

802

**Figure 6. CRISPR3 array reduction is not dependent on RecA.** Two randomly selected transconjugants were passaged *in vitro* with erythromycin selection and the CRISPR3 amplicon sizes were monitored using PCR and gel electrophoresis. As a control, the T11RFΔrecA parent strain was passaged in BHI and used as a control in PCR analysis. L: DNA Ladder.

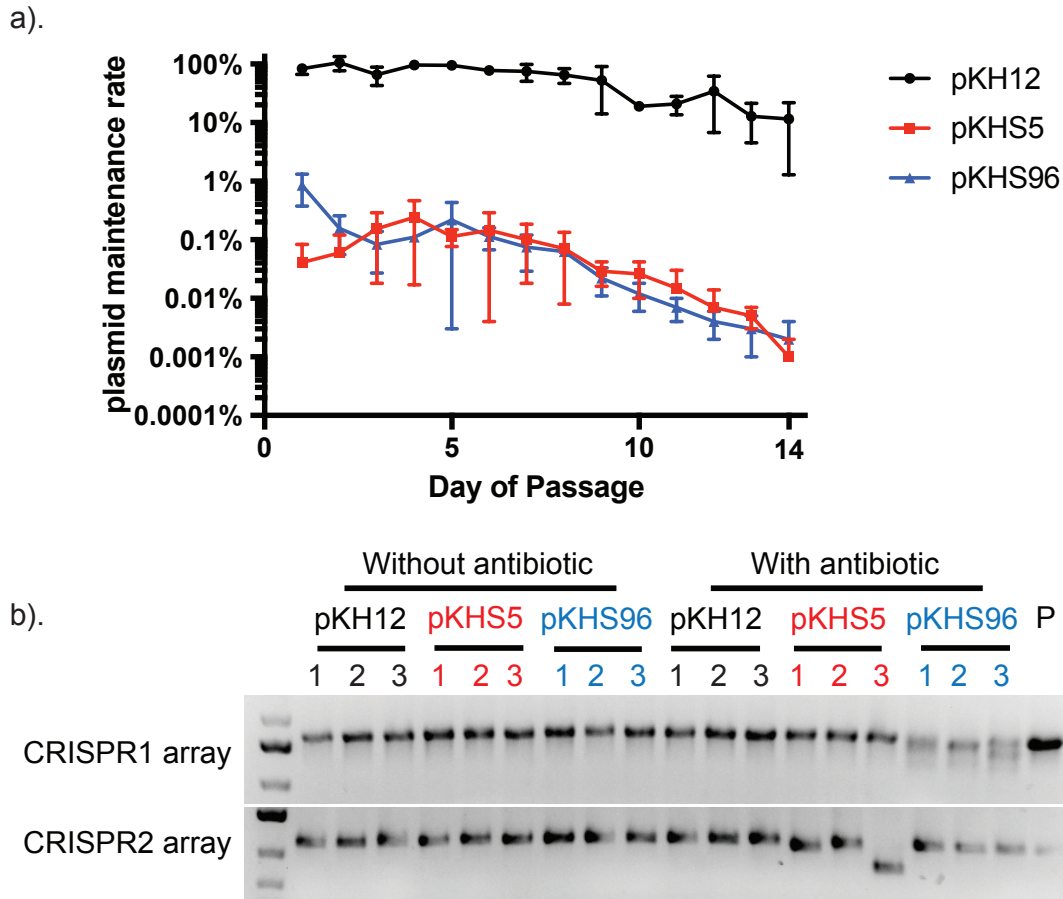

803  
804  
805

**Figure 7. Antibiotic-driven CRISPR compromise is conserved in all type II CRISPR-Cas systems in *E. faecalis*.** a) Plasmid maintenance rates of OG1RF transformants passaged in the absence of chloramphenicol. Each dot represents the average rate from three transformants with the standard deviation. b) CRISPR1 and CRISPR2 amplicon PCR results from Day 14 transformant populations passaged without antibiotic (left) and with antibiotic (right). P: positive control.

811  
812



813 **Table 1. Bacterial strains and plasmids used.**  
814

| <b>Name</b>                       | <b>Description</b>                                                                                                    | <b>Reference</b> |
|-----------------------------------|-----------------------------------------------------------------------------------------------------------------------|------------------|
| <b><i>E. faecalis</i> strains</b> |                                                                                                                       |                  |
| T11RF                             | Rifampicin- and fusidic acid-resistant derivative of the human urine isolate T11                                      | (32, 53)         |
| T11RF $\Delta$ <i>cas9</i>        | Derivative of T11RF with <i>cas9</i> deleted                                                                          | (32)             |
| T11RF $\Delta$ <i>recA</i>        | Derivative of T11RF with <i>recA</i> deleted                                                                          | This study       |
| OG1RF                             | Rifampicin- and fusidic acid-resistant derivative of the human oral isolate OG1                                       | (21, 54)         |
| OG1SSp                            | Spectinomycin- and streptomycin-resistant derivative of OG1; donor strain for conjugation assays                      | (42, 43, 45)     |
| <b>Plasmids</b>                   |                                                                                                                       |                  |
| pAM714                            | 65 kb PRP encoding erythromycin on Tn917, derivative of pAD1                                                          | (43)             |
| pCF10                             | 67 kb PRP encoding tetracycline resistance on Tn925                                                                   | (45)             |
| pLZ12                             | Broad host range shuttle vector encoding chloramphenicol resistance                                                   | (55)             |
| pKH12                             | pLZ12 with <i>oriT</i>                                                                                                | (56)             |
| pKHS5                             | pKH12 with CRISPR2 protospacer S5 and CRISPR1/2 PAM                                                                   | This study       |
| pKHS96                            | pKH12 with CRISPR1 protospacer S96 and CRISPR1/2 PAM                                                                  | (39)             |
| pWH <i>recA</i>                   | pLT06 with ~750 bp up- and downstream of T11RF <i>recA</i>                                                            | This study       |
| pVP107                            | pLT06 with T11CR2 protospacer and CRISPR1/2 PAM                                                                       | (32)             |
| pWH107                            | pVP107 digested with XbaI/SphI and re-ligated with primers pVP107_XbaI_For/pVP107_SphI_Rev to remove PstI enzyme site | This study       |
| pWH107.S1                         | pWH107 with T11CR3 protospacer S1 and CRISPR3 PAM inserted between BamHI/PstI                                         | This study       |
| pWH107.S6                         | pWH107 with T11CR3 protospacer S6 and CRISPR3 PAM inserted between BamHI/PstI                                         | This study       |
| pWH107.S7                         | pWH107 with T11CR3 protospacer S10 and CRISPR3 PAM inserted between BamHI/PstI                                        | This study       |

815

816

817 **Table 2. CRISPR alleles.**  
818

| Sample name                | Day 1 Sanger <sup>c</sup>                          | Day 14 Sanger <sup>c</sup>                         | Day 1 Amplicon <sup>d</sup>                                                                                                                    | Day 14 Amplicon <sup>d</sup>                                                                                                                   |
|----------------------------|----------------------------------------------------|----------------------------------------------------|------------------------------------------------------------------------------------------------------------------------------------------------|------------------------------------------------------------------------------------------------------------------------------------------------|
| T11RF control <sup>a</sup> | WT                                                 | WT                                                 | WT                                                                                                                                             | WT                                                                                                                                             |
| $\Delta 4^b$               | WT                                                 | WT                                                 | WT                                                                                                                                             | WT                                                                                                                                             |
| WT1 <sup>b</sup>           | Poor quality at S <sub>6</sub> -<br>S <sub>7</sub> | WT                                                 | $\Delta S_6$<br>$\Delta S_6$ -S <sub>7</sub>                                                                                                   | WT                                                                                                                                             |
| WT2 <sup>b</sup>           | WT                                                 | $\Delta S_2$ -S <sub>11</sub>                      | WT                                                                                                                                             | $\Delta S_2$ -S <sub>11</sub>                                                                                                                  |
| WT3 <sup>b</sup>           | Poor quality at S <sub>6</sub> -<br>S <sub>7</sub> | $\Delta S_5$ -S <sub>7</sub>                       | $\Delta S_6$<br>$\Delta S_5$ -S <sub>7</sub>                                                                                                   | $\Delta S_5$ -S <sub>7</sub><br>$\Delta S_6$                                                                                                   |
| WT5 <sup>b</sup>           | Poor quality at S <sub>3</sub> -<br>S <sub>8</sub> | Poor quality at S <sub>3</sub> -<br>S <sub>9</sub> | $\Delta S_5$ -S <sub>8</sub><br>$\Delta S_3$ -S <sub>16</sub><br>$\Delta S_6$<br>$\Delta S_4$ -S <sub>9</sub><br>$\Delta S_1$ -S <sub>14</sub> | $\Delta S_5$ -S <sub>8</sub><br>$\Delta S_4$ -S <sub>9</sub><br>$\Delta S_6$<br>$\Delta S_6$ -S <sub>18</sub><br>$\Delta S_3$ -S <sub>16</sub> |
| WT6 <sup>b</sup>           | Poor quality at S <sub>1</sub> -<br>S <sub>7</sub> | Poor quality at S <sub>5</sub> -<br>S <sub>6</sub> | $\Delta S_5$ -S <sub>6</sub><br>$\Delta S_1$ -S <sub>17</sub><br>$\Delta S_5$ -S <sub>7</sub><br>$\Delta S_6$<br>$\Delta S_6$ -S <sub>9</sub>  | $\Delta S_6$<br>$\Delta S_5$ -S <sub>6</sub><br>$\Delta S_5$ -S <sub>7</sub><br>$\Delta S_6$ -S <sub>10</sub>                                  |

819 <sup>a</sup>T11RF without pAM714 passaged for 14 days in BHI medium.

820 <sup>b</sup>pAM714 transconjugants passaged for 14 days in BHI medium with erythromycin.

821 <sup>c</sup>CRISPR3 alleles detected by Sanger sequencing.

822 <sup>d</sup>CRISPR3 alleles detected by Illumina amplicon deep sequencing. Mutant alleles with >0.3%  
823 abundance are shown for each population and are listed from highest to lowest abundance. If  
824 no mutant alleles were detected above this threshold, "WT" is stated.

825

826

827 **Table 3. Nonsynonymous *cas9* mutations detected by whole genome sequencing.**  
828

| Position | Ref | Allele | Amino acid change | WT1 <sup>a</sup> | WT2 <sup>a</sup> | WT3 <sup>a</sup> |
|----------|-----|--------|-------------------|------------------|------------------|------------------|
| 652983   | G   | A      | Gln506*           | 31.6% (689x)     | ND (590x)        | ND (577x)        |
| 653184   | C   | T      | Glu439Lys         | ND (640x)        | ND (536x)        | 24.2% (594x)     |
| 653180   | AG  | T      | Leu440fs          | ND (640x)        | ND (528x)        | 23.5% (590x)     |
| 654165   | G   | -      | Arg112fs          | ND (676x)        | 48.4% (659x)     | ND (772x)        |

829 <sup>a</sup>Shown are variation frequency and coverage at the indicated nucleotide position on *E. faecalis* T11  
830 contig 1.11.  
831 ND, not detected.

832

### 833 Supporting Information Figure Legends

#### 834 **Figure S1. *E. faecalis* possesses two Type II CRISPR-Cas systems and one orphan**

835 **CRISPR.** a) Schematic mechanism of Type II CRISPR-Cas defense in bacteria. Upon MGE

836 invasion, CRISPR-Cas acts as a genome defense system. When a new MGE is encountered,

837 the protospacer is recognized based on Protospacer Adjacent Motif (PAM). A complex of Cas

838 proteins incorporates the protospacer into the leader end of CRISPR array to form a new spacer

839 (Adaptation). During the expression stage, the CRISPR array is transcribed into pre-crRNA,

840 which is further processed into mature crRNA by Cas9, tracrRNA and a host-encoded

841 endonuclease. The mature crRNA consists of part of a repeat and part of a spacer, which is

842 bound to a Cas9:tracrRNA complex to form an effector complex. When the previously

843 encountered MGE invades again, the effector complex recognizes the target by sequence

844 complementarity and the presence of a PAM. Upon recognition, the target is cleaved and thus

845 invasion by the MGE is blocked. The definition of R, TR and S<sub>n</sub> is described in Material and

846 Methods. b). CRISPR-Cas loci occurring in *E. faecalis* T11RF and OG1RF. *E. faecalis* T11RF

847 encodes a CRISPR3-Cas system and a CRISPR2 array. S<sub>6</sub> within the CRISPR3 array targets

848 pAM714 and pWH107.S6, while S<sub>1</sub> and S<sub>7</sub> within CRISPR3 array target pWH107.S1 and

849 pWH107.S7, respectively. *E. faecalis* OG1RF encodes a CRISPR1-Cas system and a

850 CRISPR2 array. S<sub>4</sub> within CRISPR1 array targets pKHS96, while S<sub>6</sub> within CRISPR2 array  
851 targets pKHS5.

852

853 **Figure S2. Initial phenotypes of select transconjugants.** a) Frequency of pAM714 carriage in  
854 transconjugant colonies used to initiate serial passage experiments. b) CRISPR3 amplicon PCR  
855 results for transconjugant colonies used to initiate serial passage experiments. Shown are  
856 CRISPR3 amplicon sizes for six T11RF pAM714 transconjugants (WT 1-6), a representative  
857 T11RF $\Delta$ cas9 pAM714 transconjugant ( $\Delta$ 4), T11RF genomic DNA as a positive control (P), and  
858 a reagent control (N).

859

860 **Figure S3. Gel electrophoresis of CRISPR3 amplicons in T11RF pAM714 transconjugants**  
861 **over 14 days passaged with and without antibiotic.** Six T11RF pAM714 transconjugants  
862 were serially passaged for 14 days in BHI (left panel) or BHI with erythromycin (right panel). The  
863 size of the CRISPR3 array was monitored using PCR and gel electrophoresis on each passage  
864 day.

865

866 **Table S1. Primers used in this study.**

867

868 **Table S2. SNPs detection in all gDNA sequencing samples.**

869

870 **Table S3. Quality control of the amplicon sequencing reads.**
